# Supplementary material
Source: PubMed Central journal article supplement (PMC6528165)
Supplement: jo9b00338_si_001.pdf [file jo9b00338_si_001.pdf]

# Supplementary Information

## Synthesis of terminal ribose analogues of adenosine 5'-diphosphate ribose (ADPR) as probes for the Transient Receptor Potential (TRP) cation channel TRPM2

Ondřej Baszczyński<sup>§2</sup>, Joanna M. Watt<sup>§1,2</sup>, Monika D. Rozewitz<sup>3</sup>, Andreas H. Guse<sup>3</sup>, Ralf Fliegert<sup>3¶</sup>

and Barry V. L. Potter<sup>1,2,¶\*</sup>

<sup>1</sup>Medicinal Chemistry & Drug Discovery, Department of Pharmacology, University of Oxford, Mansfield Road, Oxford, OX1 3QT, UK

<sup>2</sup>Wolfson Laboratory of Medicinal Chemistry, Department of Pharmacy and Pharmacology, University of Bath, Bath, BA2 7AY, UK

<sup>3</sup>The Calcium Signalling Group, Department of Biochemistry and Molecular Cell Biology, University Medical Center Hamburg-Eppendorf, Martinistrasse 52, 20246 Hamburg, Germany

§ = Equal contribution, ¶ = Equal contribution

### Contents:

|                                                                                                                      |         |
|----------------------------------------------------------------------------------------------------------------------|---------|
| Supplementary Figure 1: Testing of suitable coupling procedure for pyrophosphate bond formation.                     | S2      |
| Supplementary Figure 2: HPLC trace showing decomposition of 2''-deoxy-ADPR <b>3</b>                                  | S4      |
| <sup>1</sup> H-NMR, <sup>13</sup> C-NMR and <sup>31</sup> P-NMR data for compounds <b>8-12, 14-19, 21-27, and 30</b> | S5-S29  |
| <sup>1</sup> H-NMR, <sup>13</sup> C-NMR and <sup>31</sup> P-NMR data for final compounds <b>1-6</b>                  | S30-S38 |
| HPLC and MS data for final compounds <b>1-6</b>                                                                      | S39-S44 |

# Supplementary Figure 1: Testing of suitable coupling procedure for pyrophosphate bond formation.<sup>1</sup>

a)

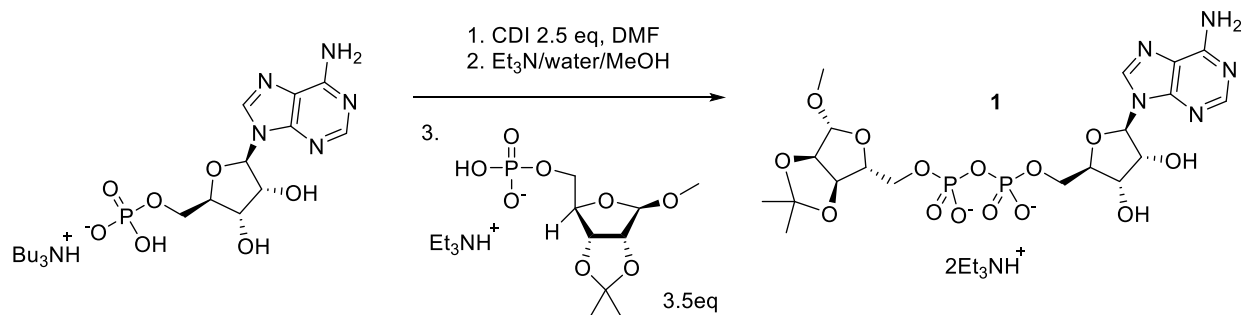

Example of HPLC analysis of the coupling reaction (Peak 4 = product – compound 1)

| SAMPLE INFORMATION |                     |                     |                        |
|--------------------|---------------------|---------------------|------------------------|
| Sample Name:       | obb-57-own          | Acquired By:        | Joanna                 |
| Sample Type:       | Unknown             | Date Acquired:      | 09/02/2016 11:46:59 AM |
| Vial:              | 29                  | Acq. Method Set:    | RP18 LC                |
| Injection #:       | 1                   | Date Processed:     | 25/02/2016 9:57:54 AM  |
| Injection Volume:  | 10.00 ul            | Processing Method:  | test protected ADPR    |
| Run Time:          | 20.0 Minutes        | Channel Name:       | WVlnCh1                |
| Sample Set Name:   | 2016_02_08_obb57own | Proc. Chnl. Descr.: | PDA 259.1 nm           |

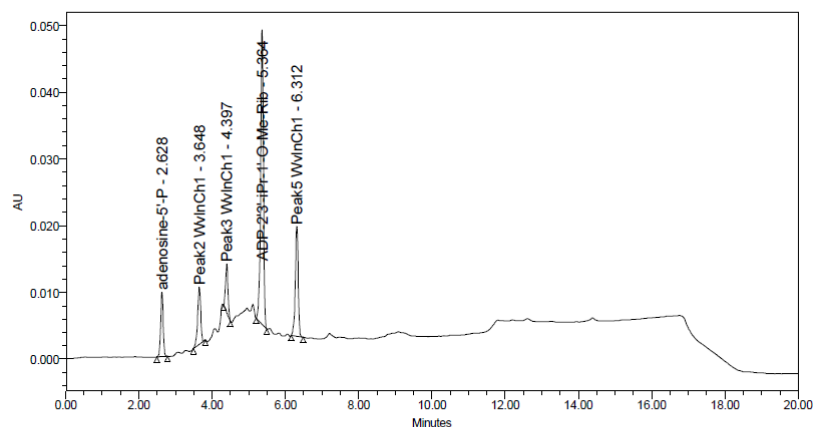

| Peak Name                  | RT    | Area   | % Area | Height |
|----------------------------|-------|--------|--------|--------|
| 1 adenosine-5'-P           | 2.628 | 46143  | 10.11  | 9658   |
| 2 Peak2 WvlnCh1            | 3.648 | 50166  | 10.99  | 8606   |
| 3 Peak3 WvlnCh1            | 4.397 | 34789  | 7.62   | 7294   |
| 4 ADP-2'3'-iPr-1'-O-Me-Rib | 5.364 | 235493 | 51.59  | 44239  |
| 5 Peak5 WvlnCh1            | 6.312 | 89866  | 19.69  | 16515  |

b) Dabrowski-Tumanski procedure<sup>2</sup>

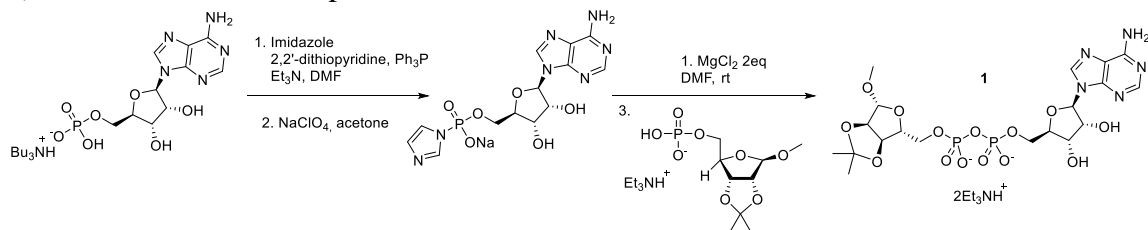

Dabrowski-Tumanski procedure<sup>2</sup>: An example of HPLC analysis of the coupling reaction (Peak 4 = product – compound **1**)

| SAMPLE INFORMATION |                       |                     |                          |
|--------------------|-----------------------|---------------------|--------------------------|
| Sample Name:       | 2016_02_24_obb59-own2 | Acquired By:        | Joanna                   |
| Sample Type:       | Unknown               | Date Acquired:      | 24/02/2016 4:47:39 PM    |
| Vial:              | 63                    | Acq. Method Set:    | RP18 LC                  |
| Injection #:       | 1                     | Date Processed:     | 25/02/2016 10:08:17 AM   |
| Injection Volume:  | 10.00 ul              | Processing Method:  | pyr coup from imidazolid |
| Run Time:          | 20.0 Minutes          | Channel Name:       | WVlnCh1                  |
| Sample Set Name:   | 2016_02_24_obb59_test | Proc. Chnl. Descr.: | PDA 259.1 nm             |

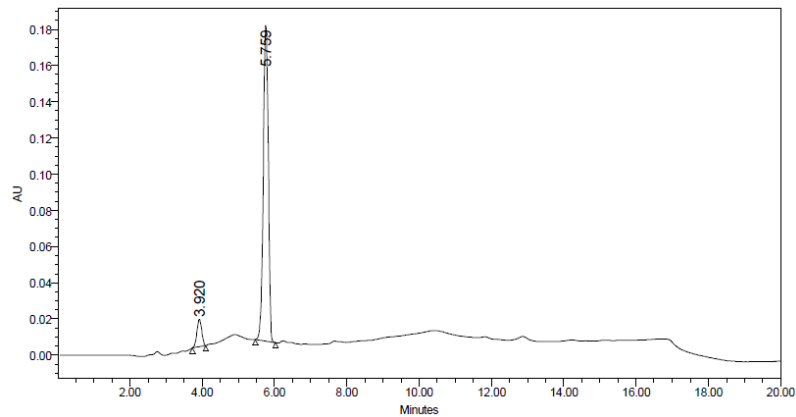

|   | Peak Name                 | RT    | Area    | % Area | Height |
|---|---------------------------|-------|---------|--------|--------|
| 1 |                           | 3.920 | 139613  | 7.63   | 15110  |
| 2 | adenosine-5'-P-imidazolid | 4.226 |         |        |        |
| 3 |                           | 5.759 | 1690715 | 92.37  | 174335 |
| 4 | ADP-2'3'-iPr-1'O-Me-Rib   | 6.401 |         |        |        |

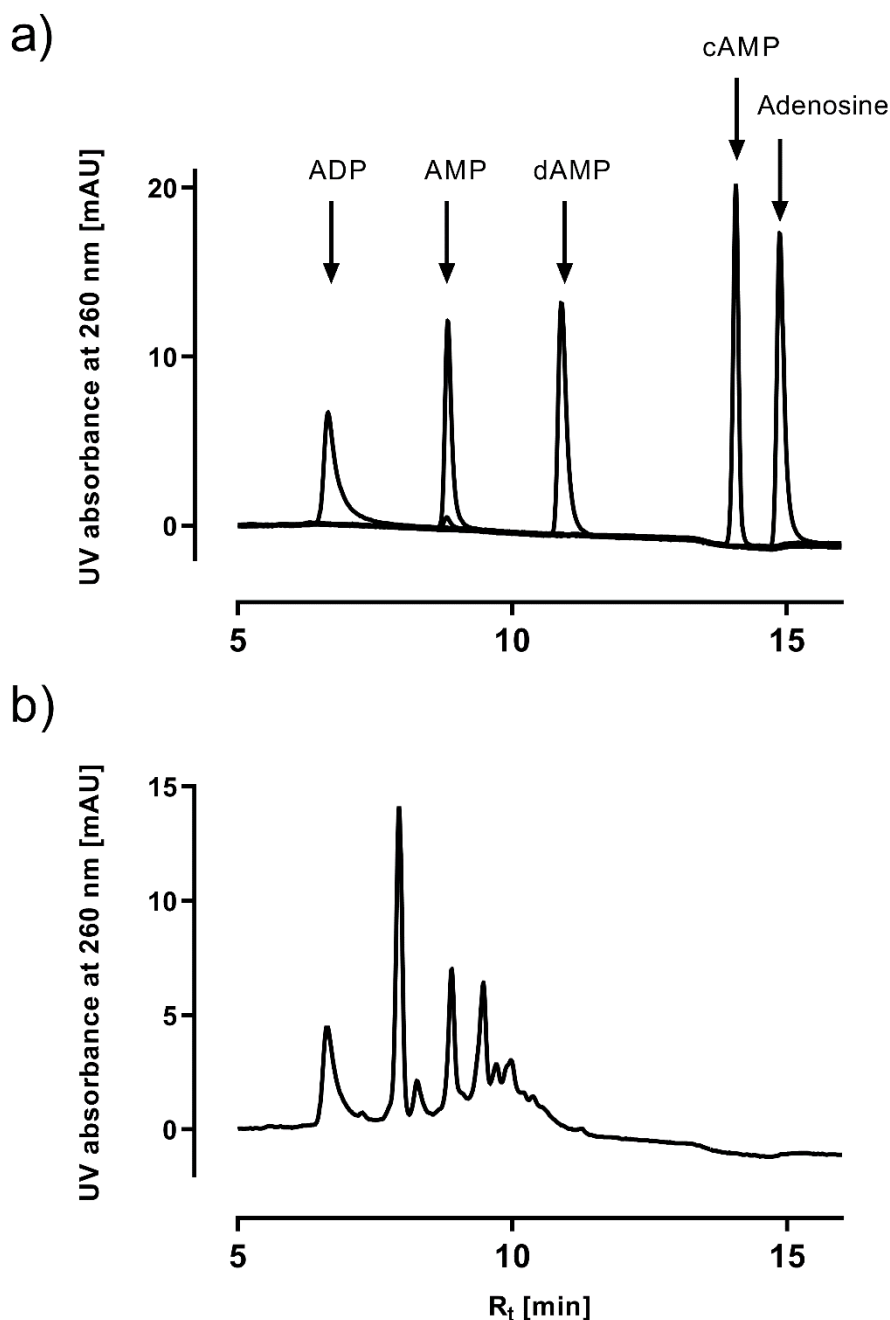

Integrity of 2''-deoxy-ADPR after transport and reconstitution was checked by RP-HPLC analysis on a 1260 Infinity system (Agilent Technologies). Samples and standards (ADP, AMP, dAMP, cAMP, Adenosine 250 pmol each) were run on a 250 mm  $\times$  4.6 mm Multohyp C18 5- $\mu$ m column (Chromatographie Service) with a 4.0 mm  $\times$  3.0 mm guard cartridge containing a C18 ODS filter element (Phenomenex) at a flow rate of 0.8 mL/min with buffer (20 mmol/l  $\text{KH}_2\text{PO}_4$ , pH 6) with a linear gradient of methanol from 0 to 50% Methanol over 22.5 min. Adenine nucleotides were detected at 260 nm. Peaks were integrated using the ChemStation Software (Rev. C.01.05; Agilent Technologies). a) Chromatograms of standards (250 pmol each). b) Chromatogram of a preparation of 2''-deoxy-ADPR after freeze drying, transport and reconstitution in 10 mmol/l HEPES pH7.2. The sample should have contained 1 nmol of 2''-deoxy-ADPR, but eluted from the column as multiple peaks, one of the fragments co-elutes with ADP.



compound-9 1HNMR

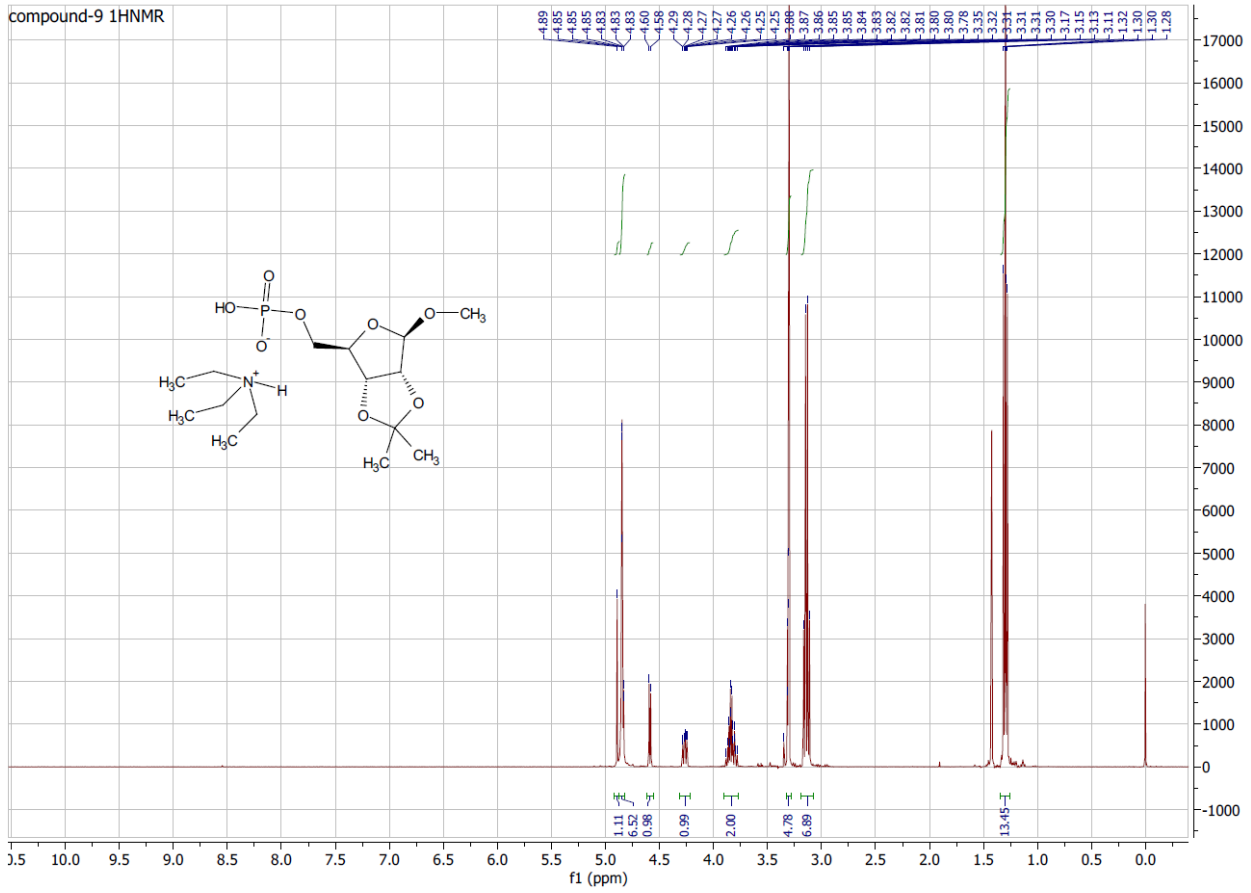

compound-9 13CNMR

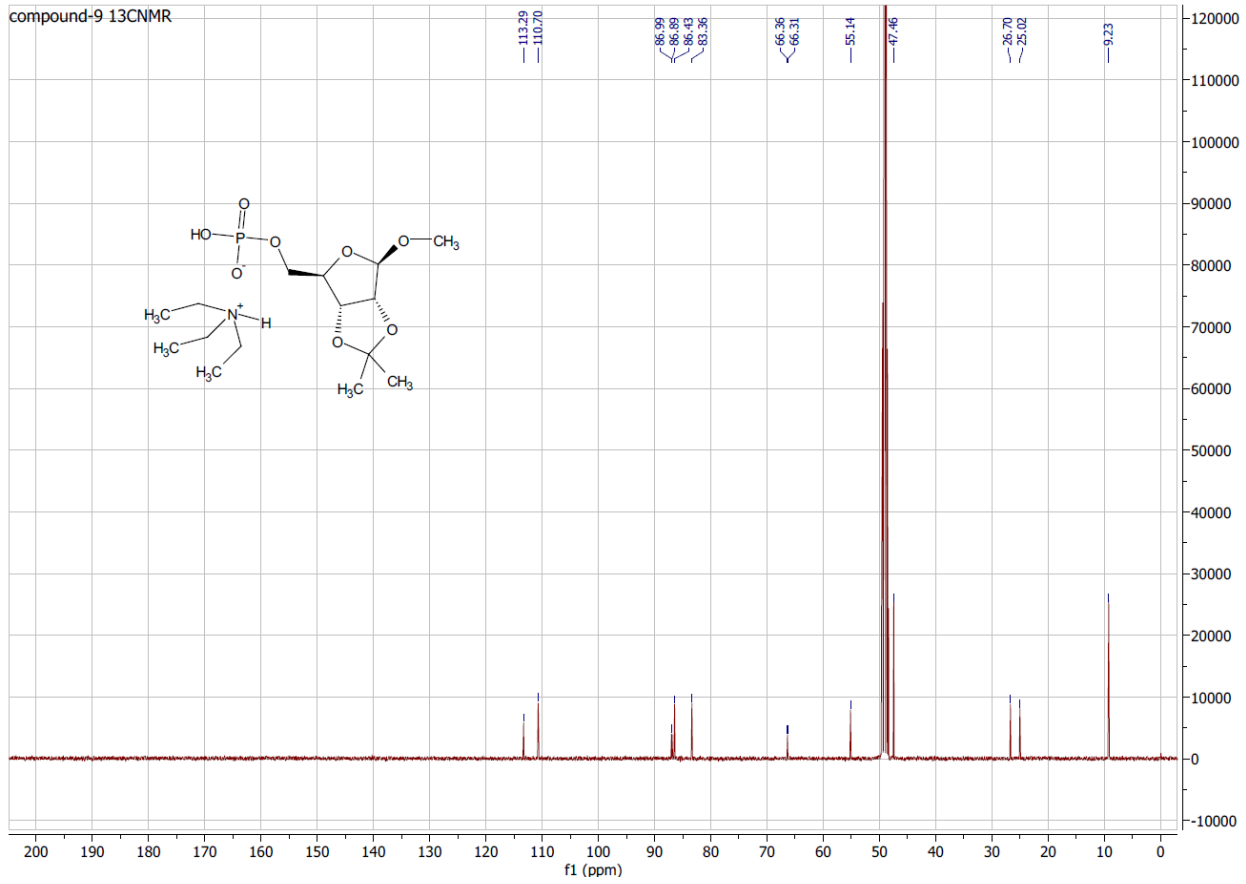



compound-15 13CNMR

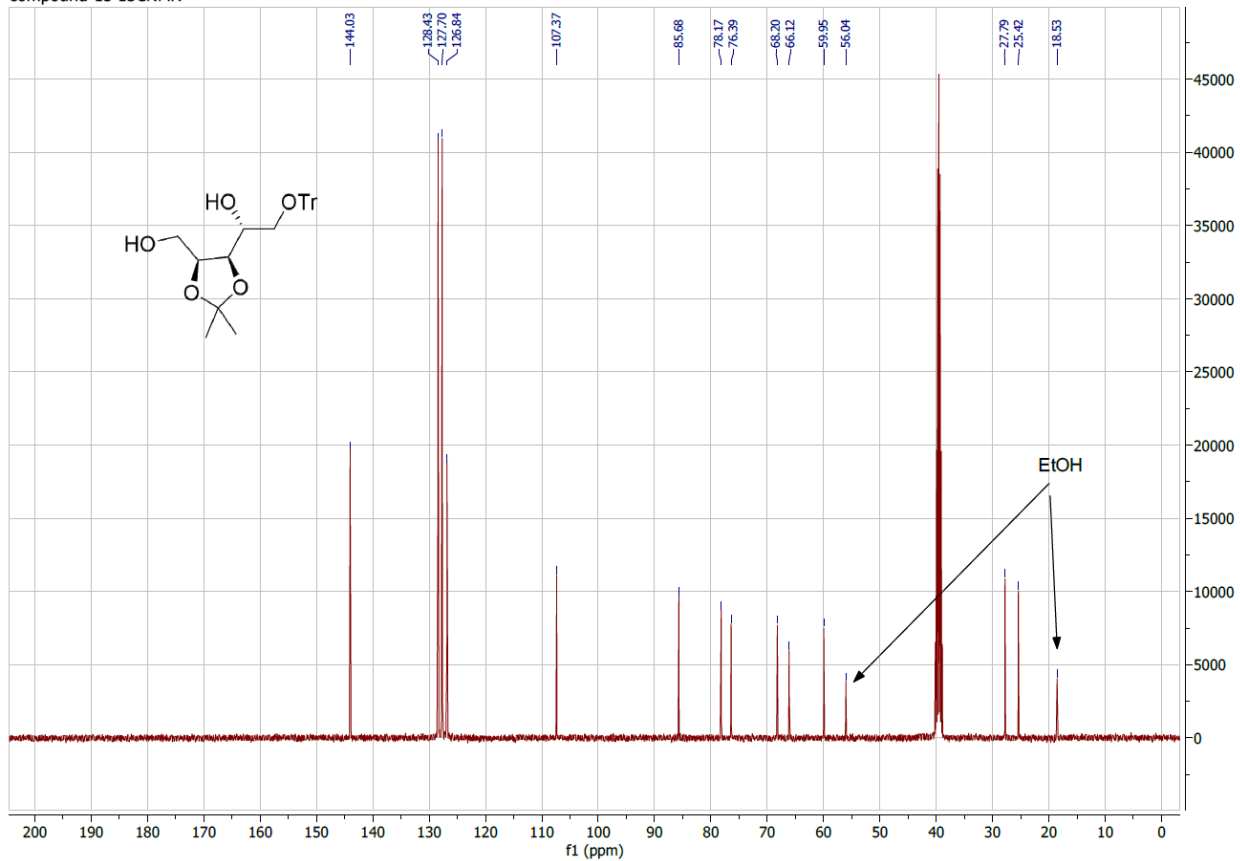

compound-16 1HNMR

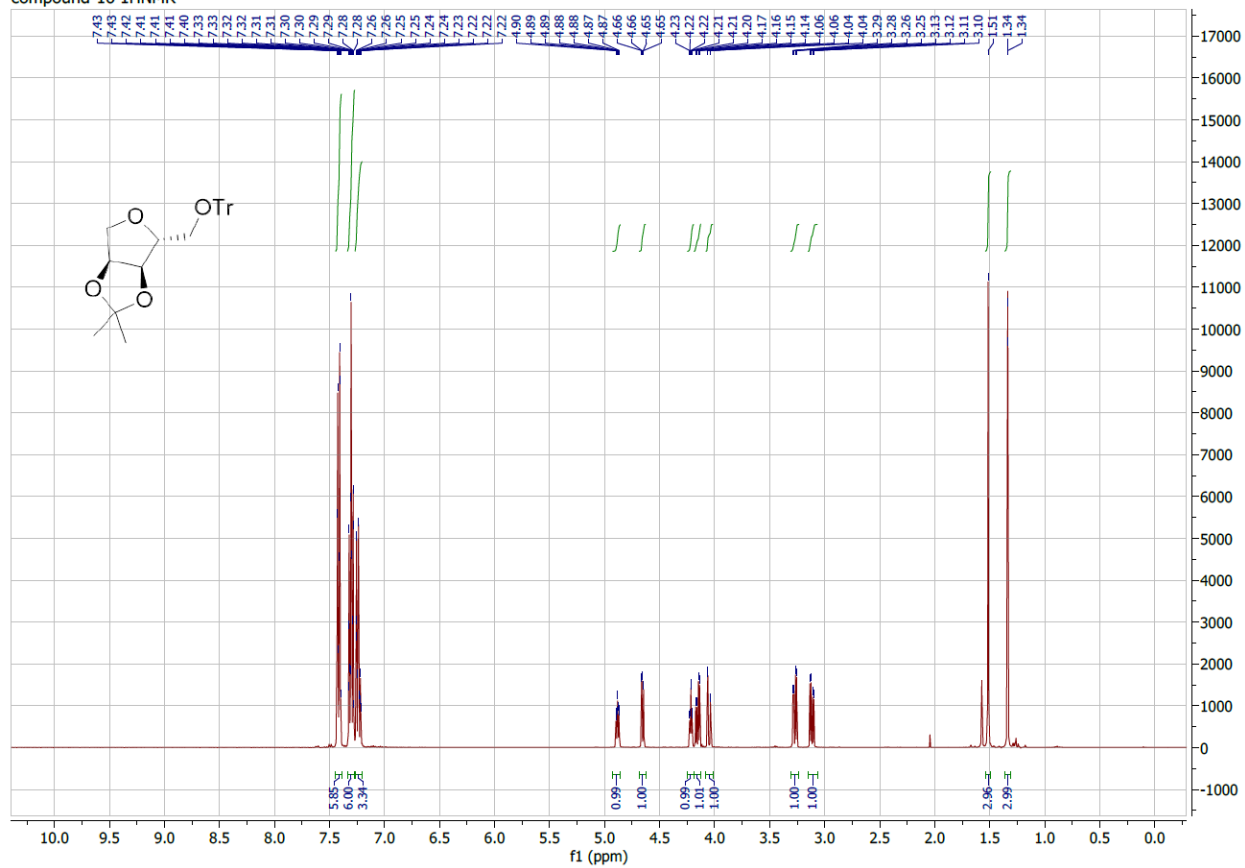



compound-16 13CNMR

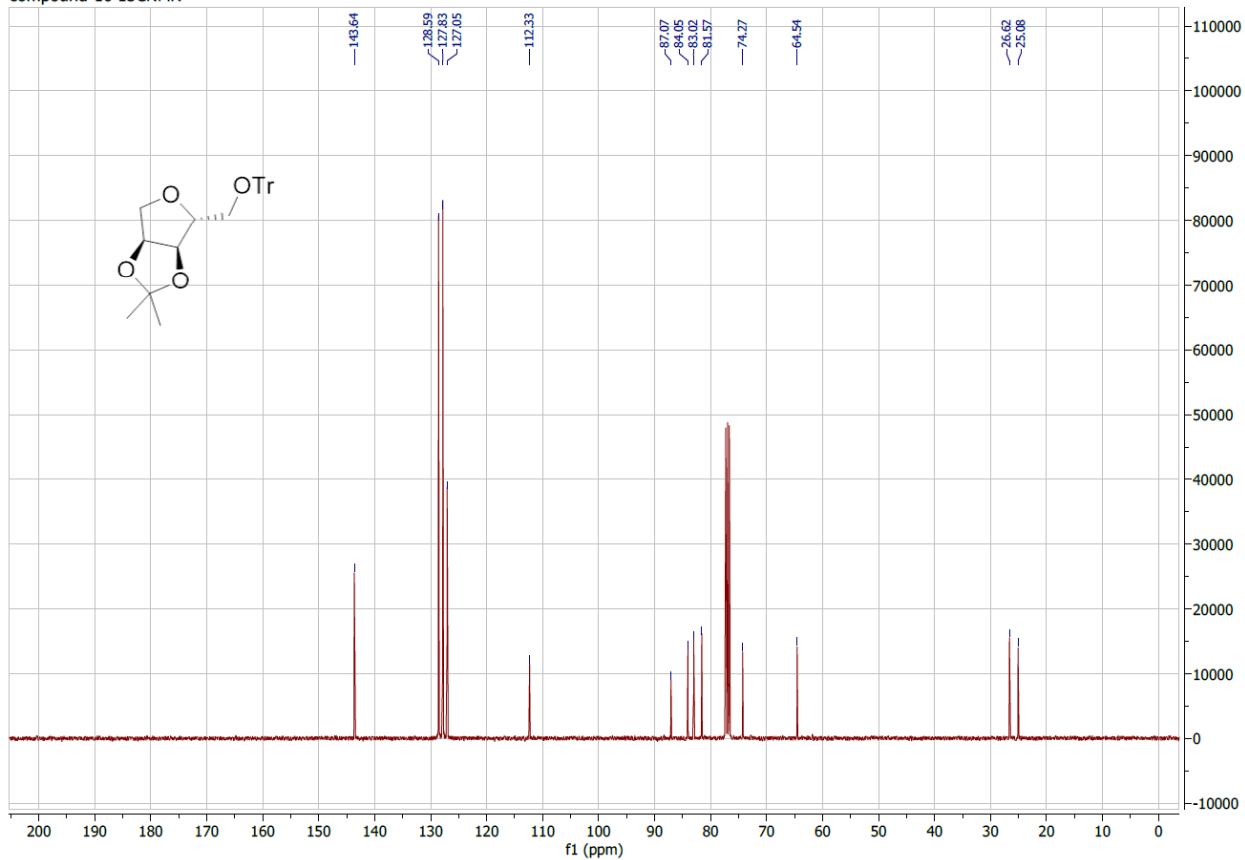

compound 17 - 1HNMR

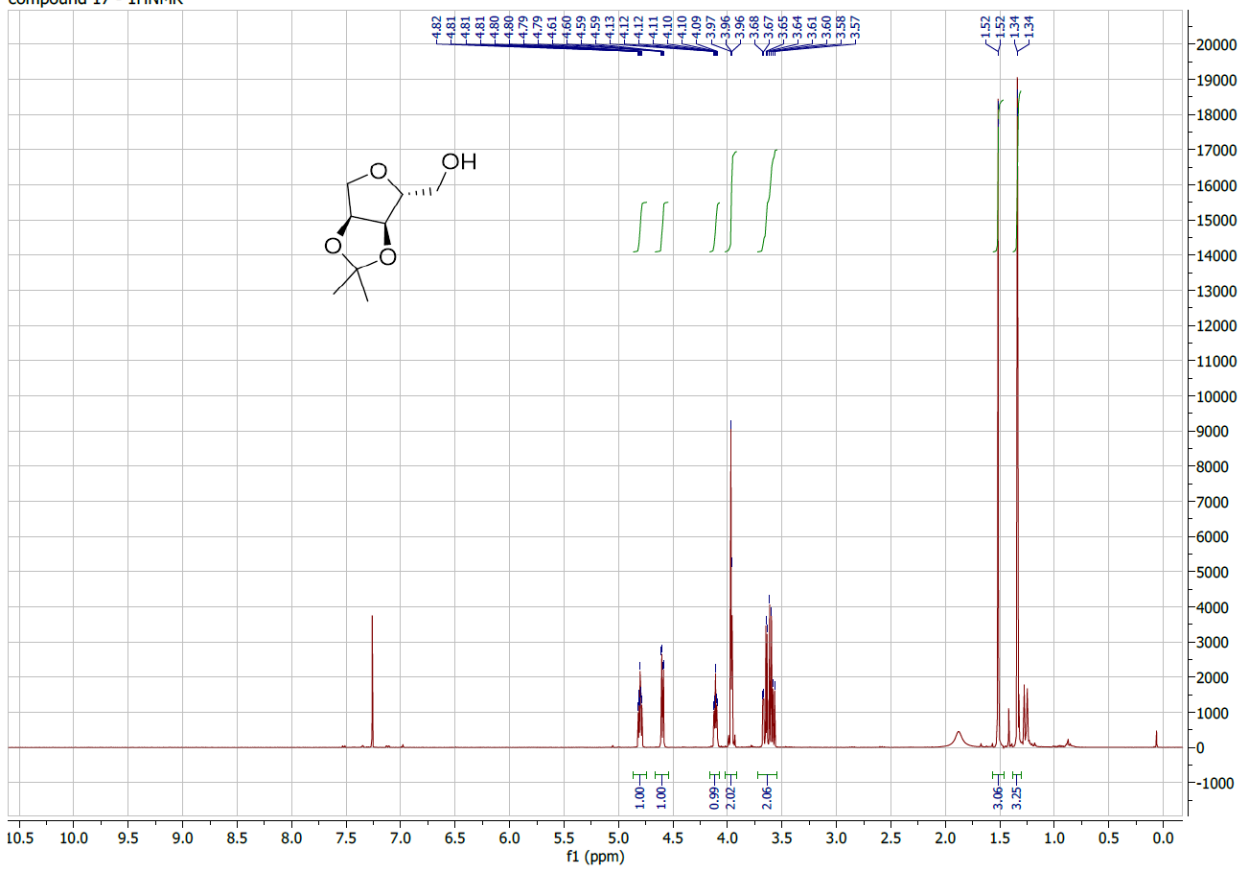

compound 17 - 13CNMR

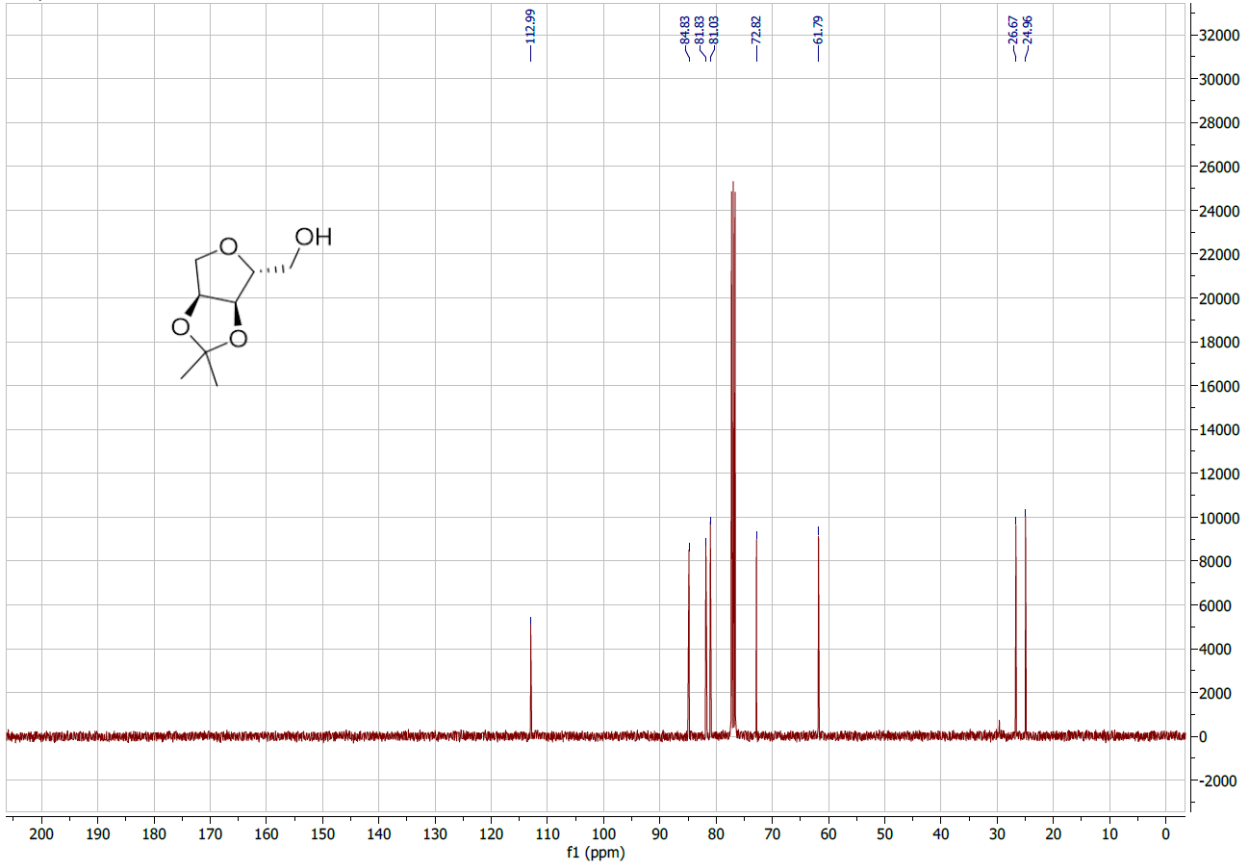

compound 18 - 1HNMR

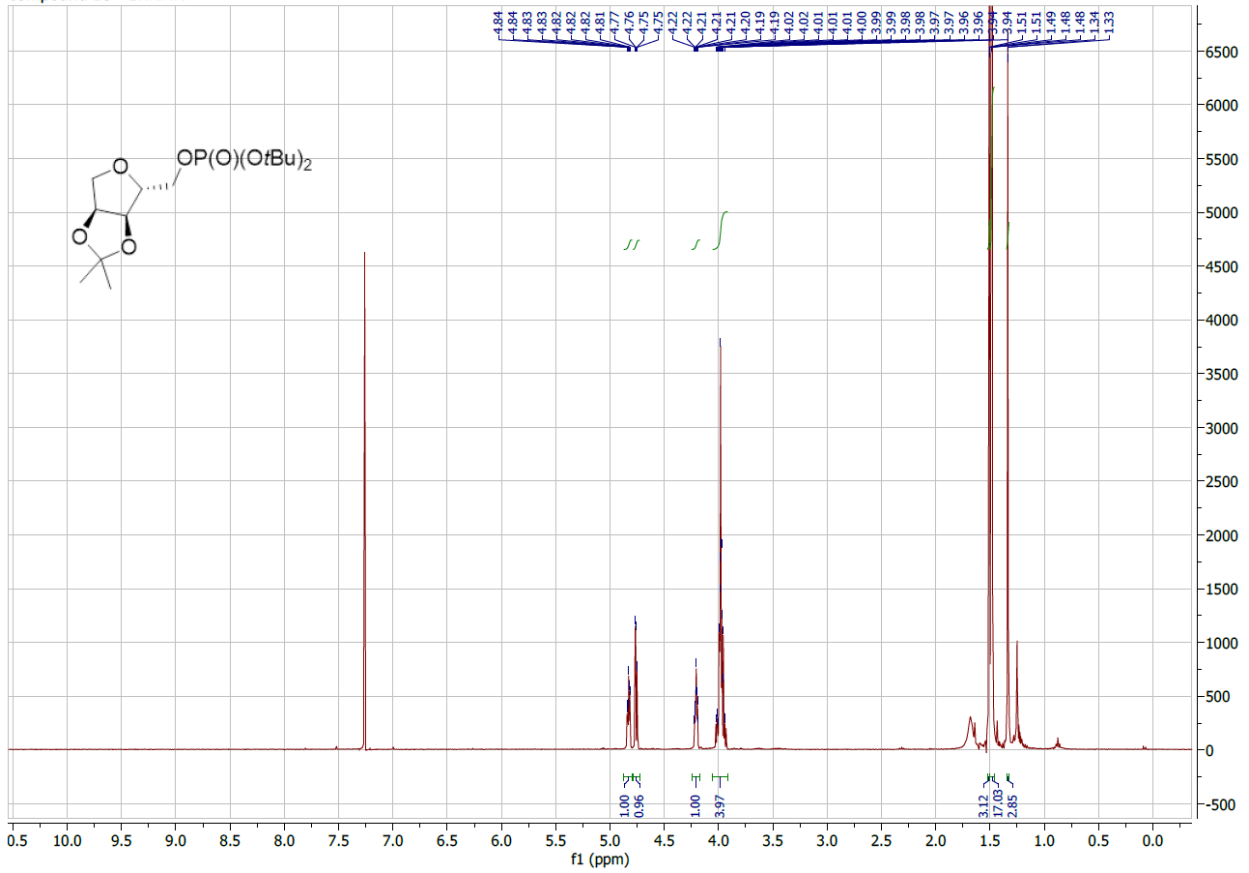

compound 18 - <sup>13</sup>CNMR

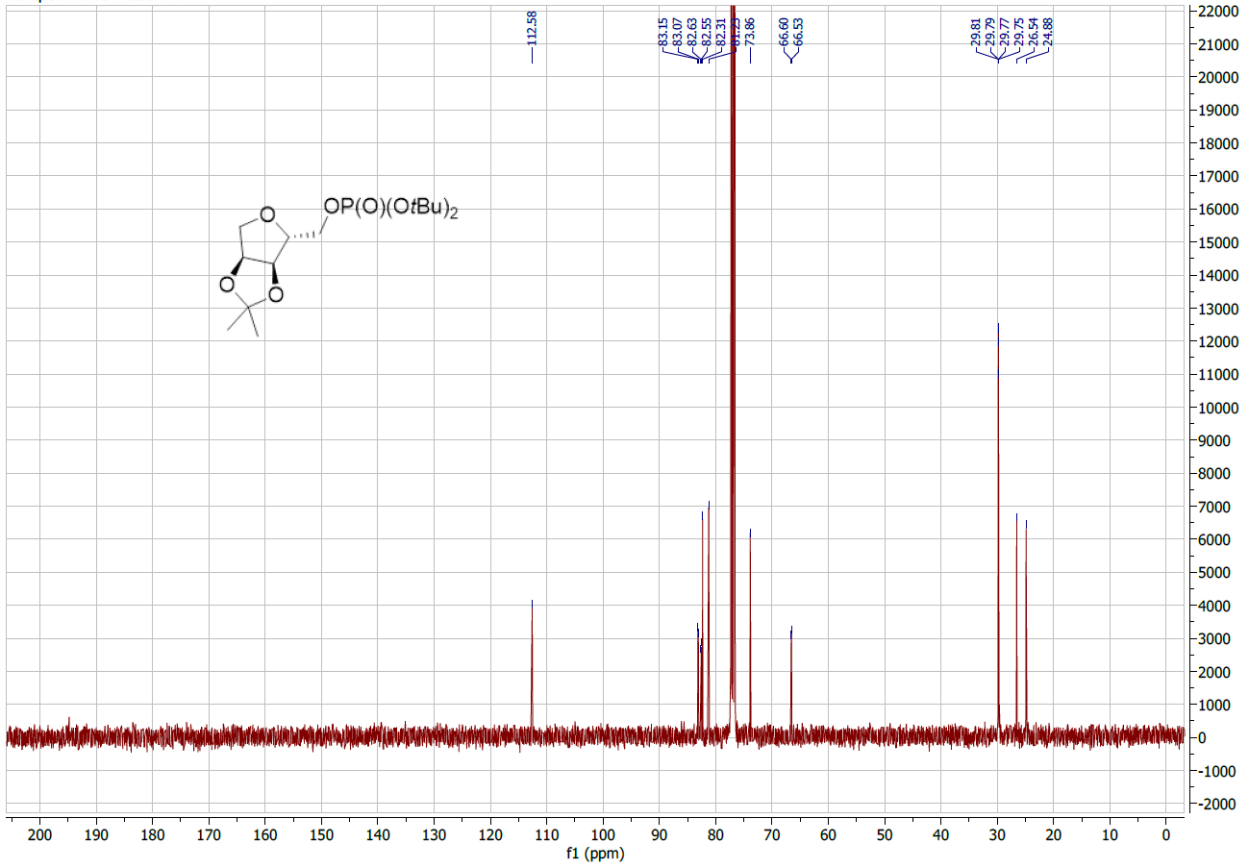

compound 18 - <sup>31</sup>PNMR

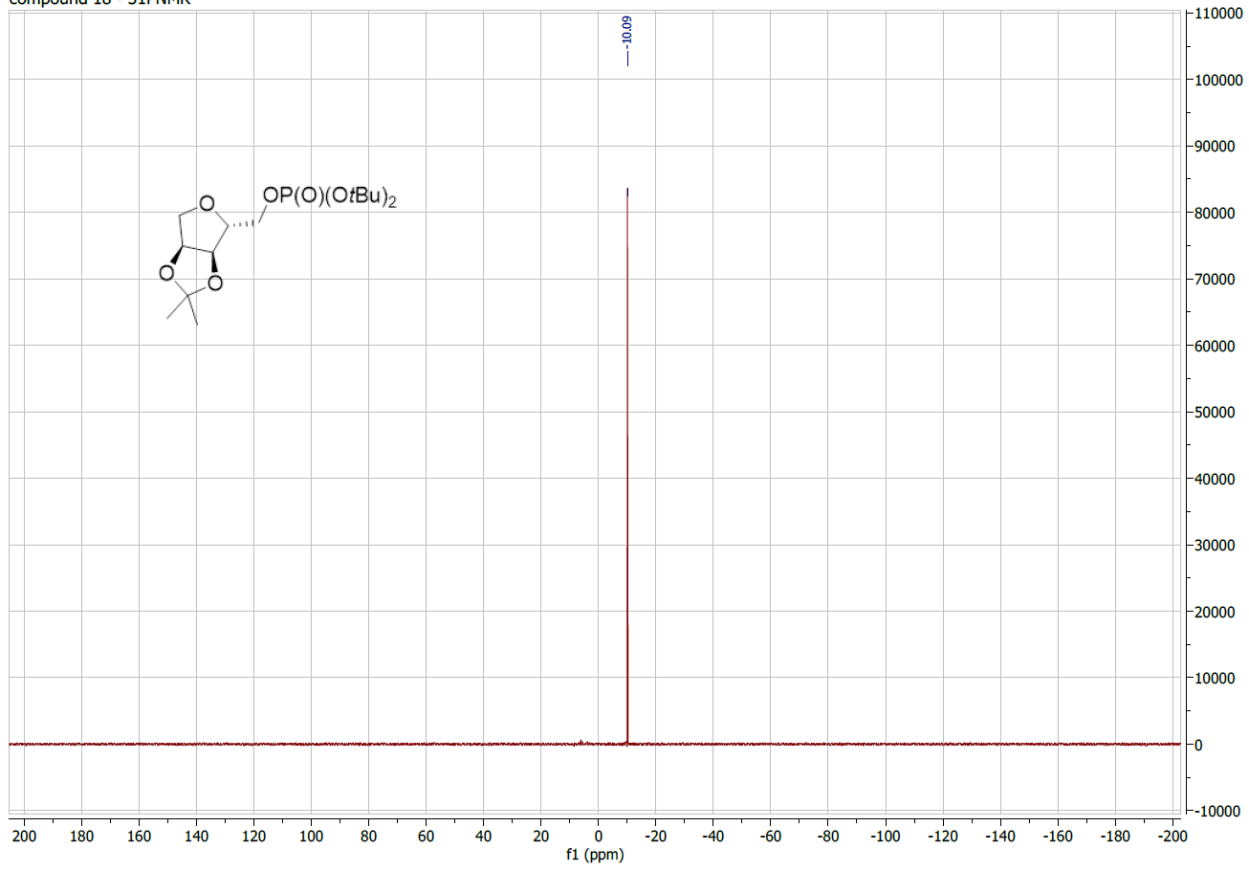

compound 10 - <sup>1</sup>H-NMR (d<sub>4</sub>-MeOH)

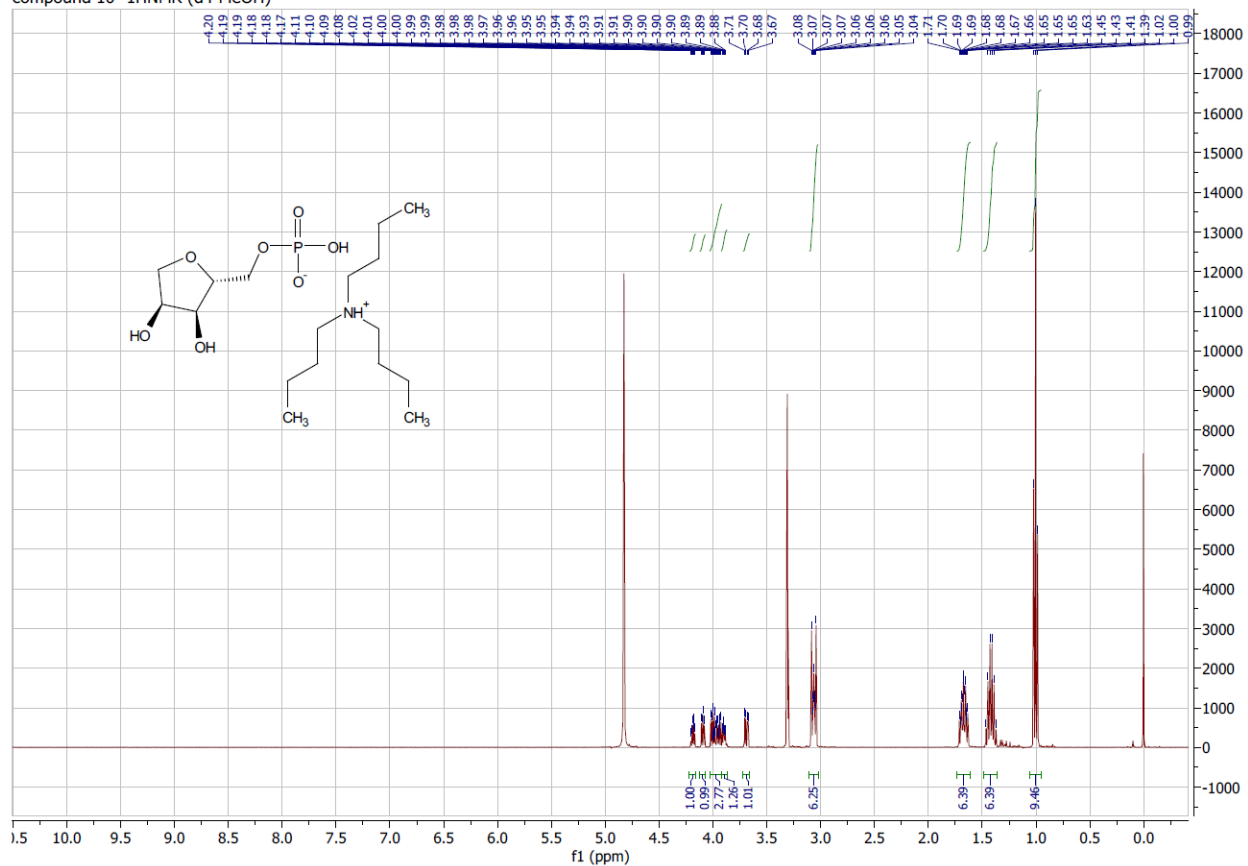

compound 10 - <sup>13</sup>C-NMR (d<sub>4</sub>-MeOH)

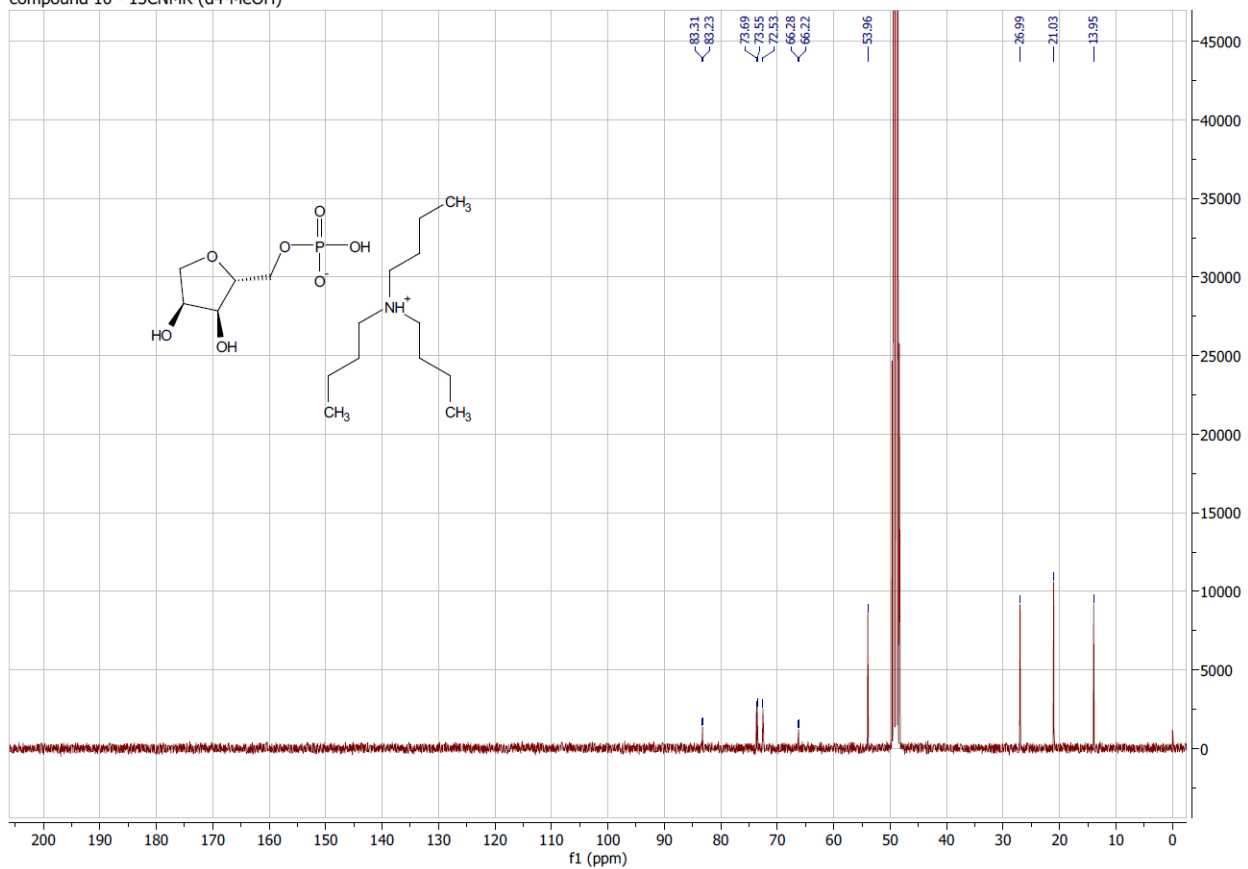

compound 10 - 31PNMR (d4-MeOH)

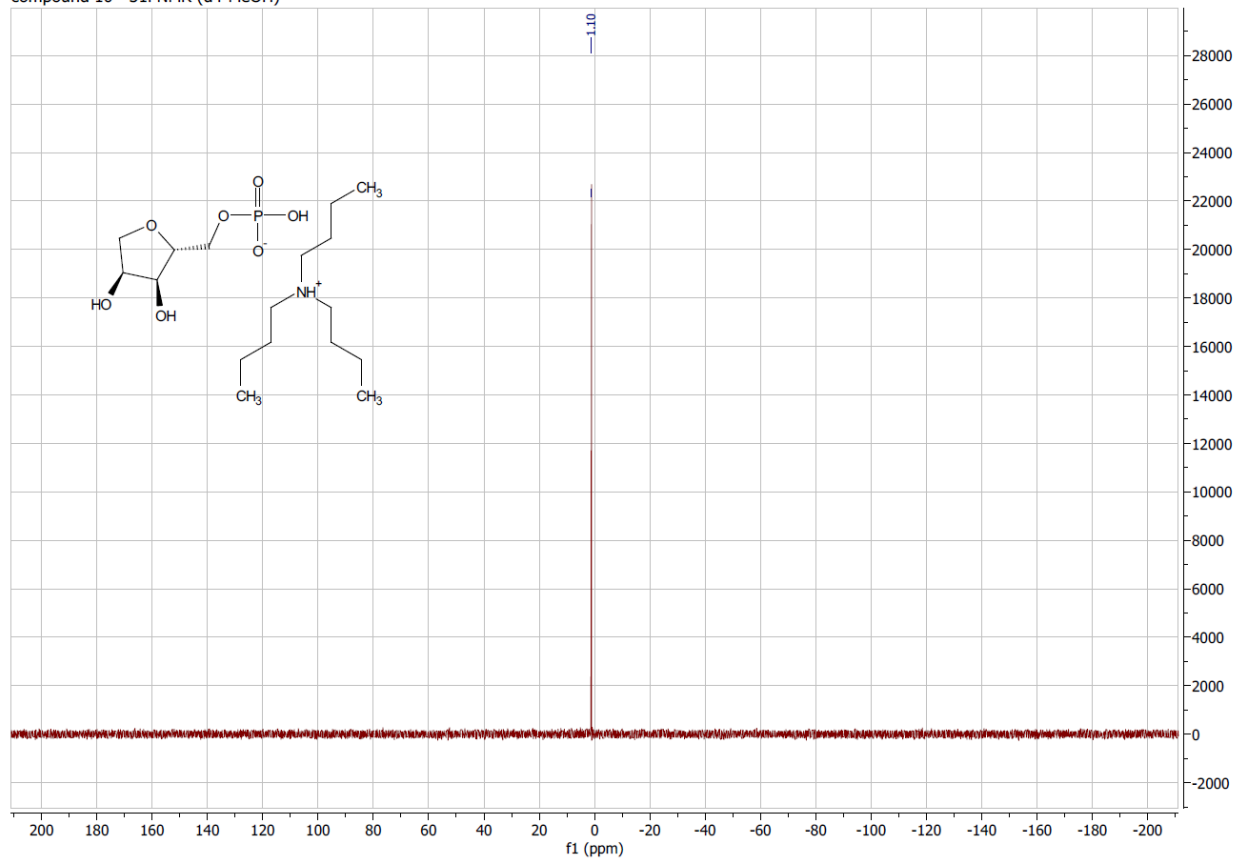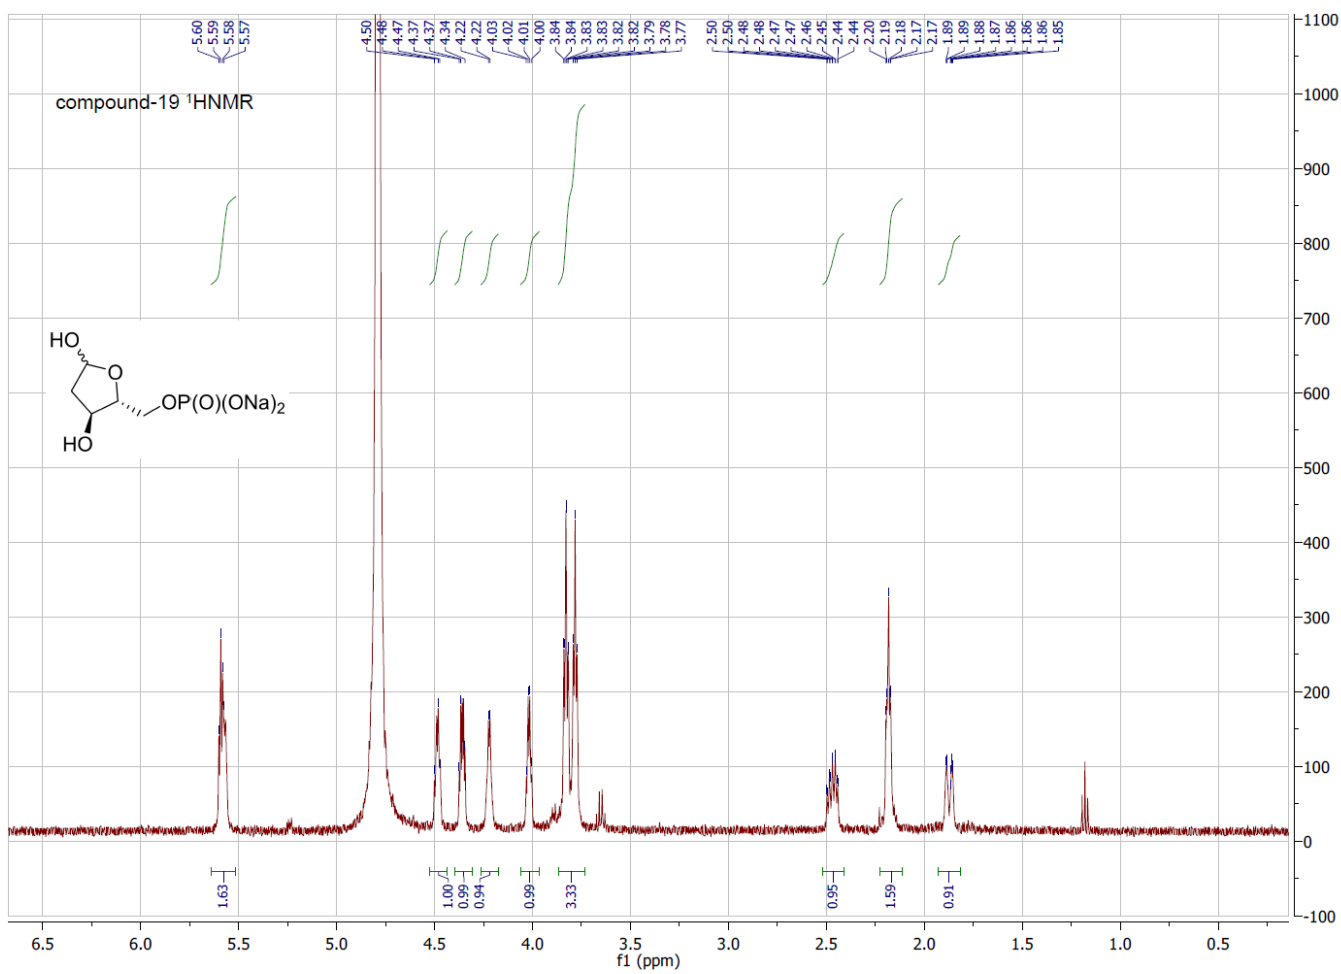

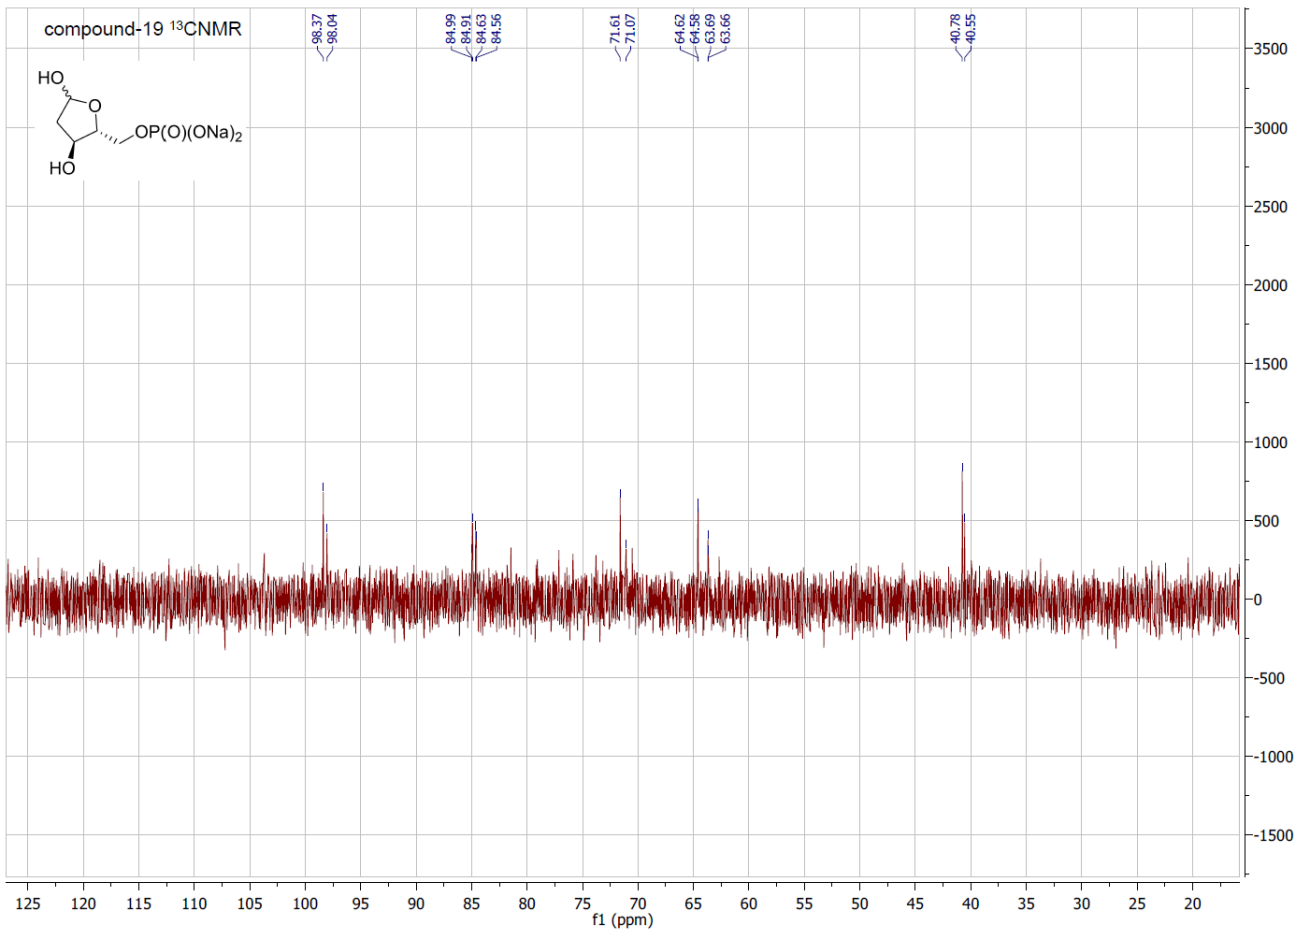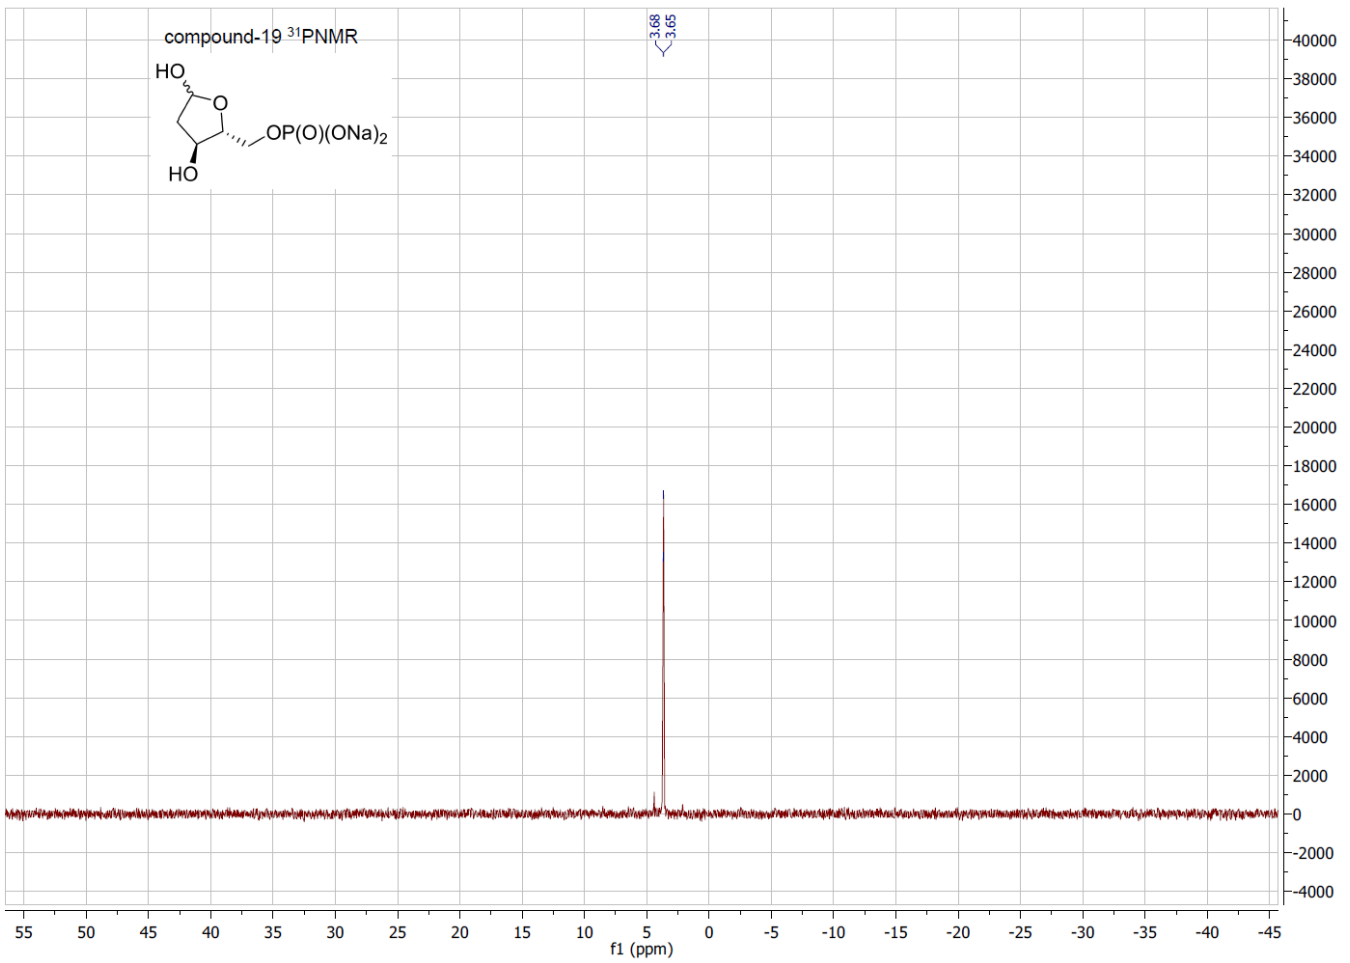

compound 11 - 1HNMR (d4-MeOH)

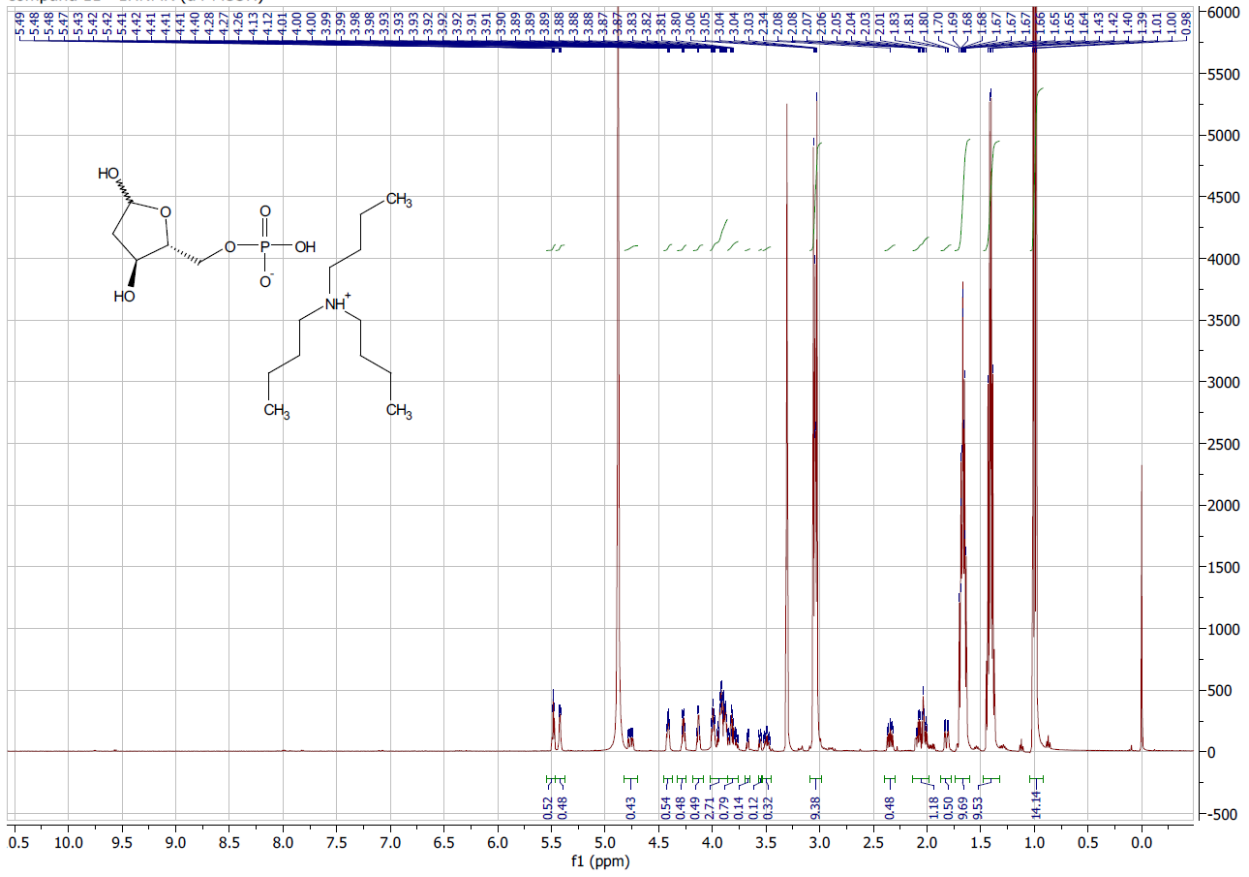

compound 11- 13CNMR

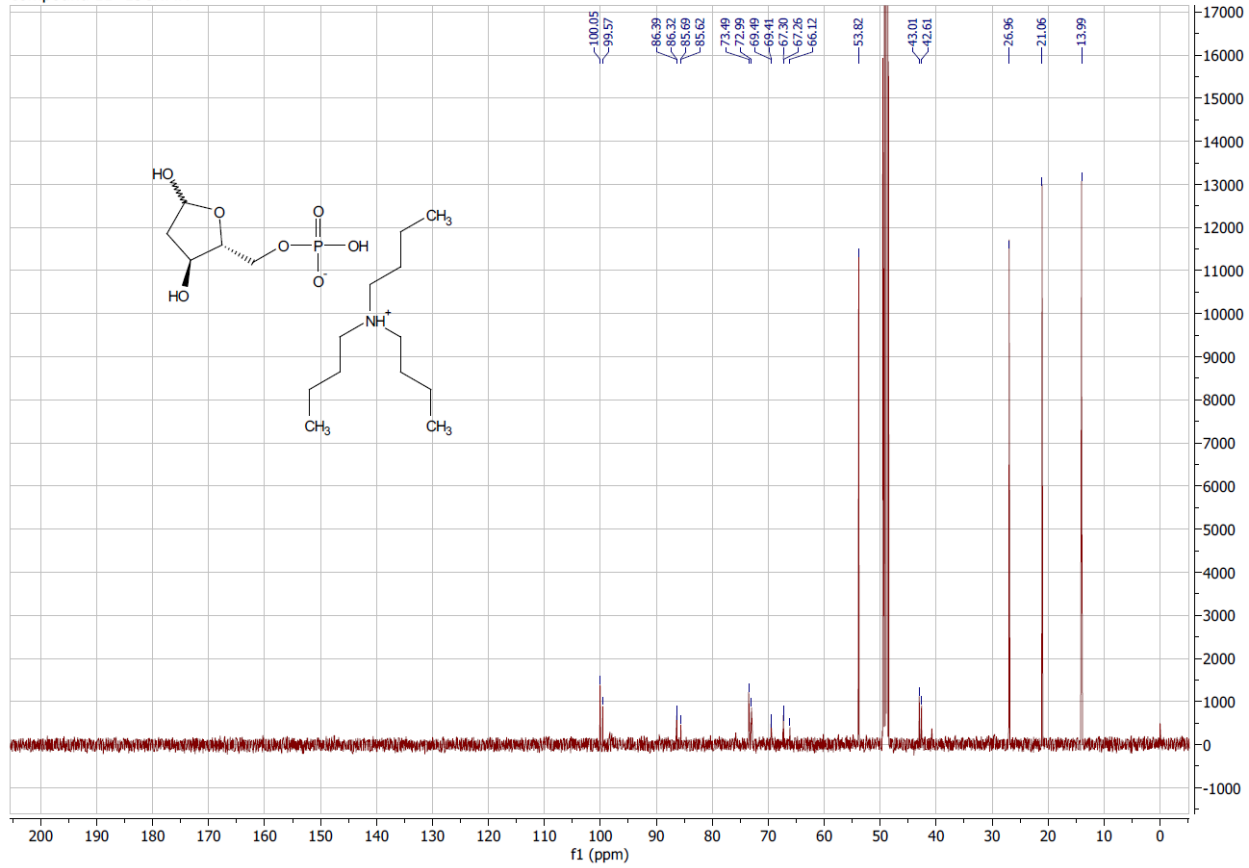

compound 11 - 31PNMR

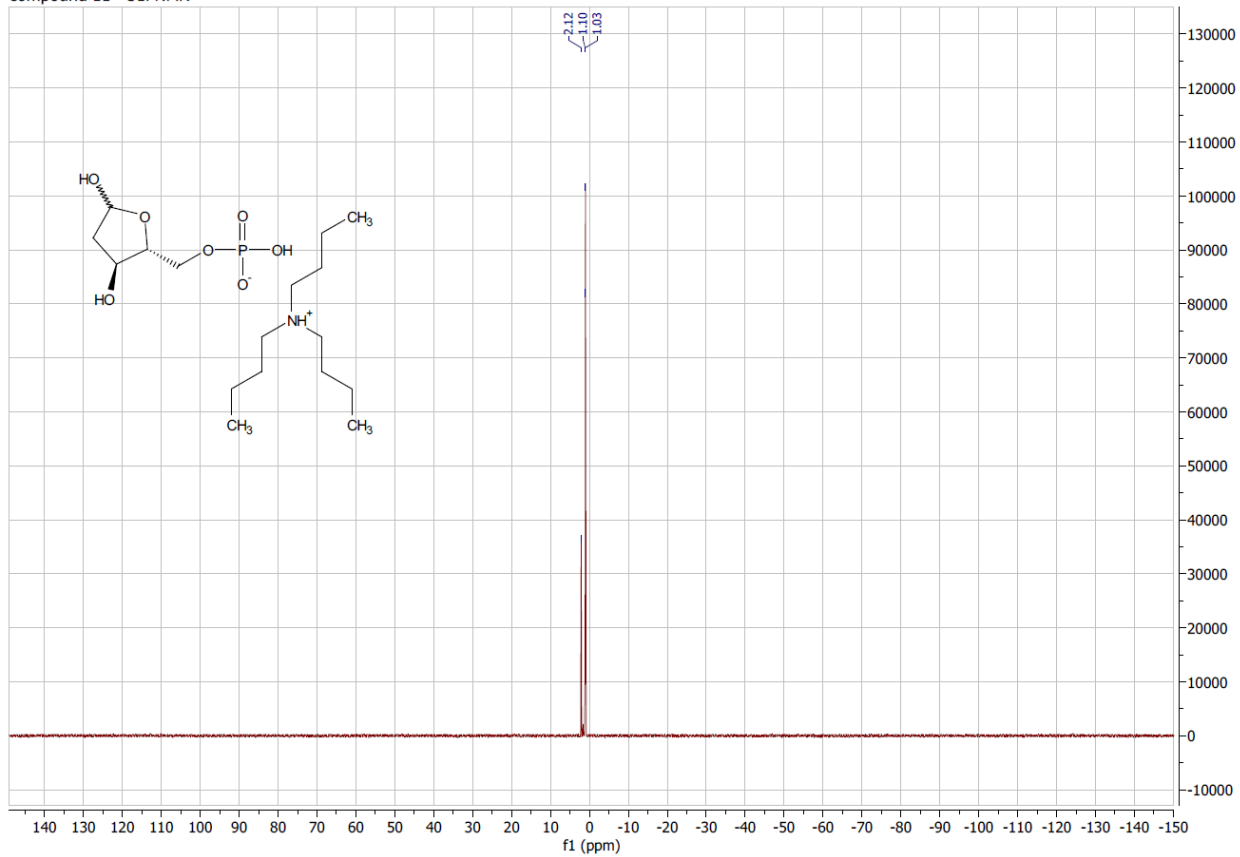

compound 20 - 1HNMR

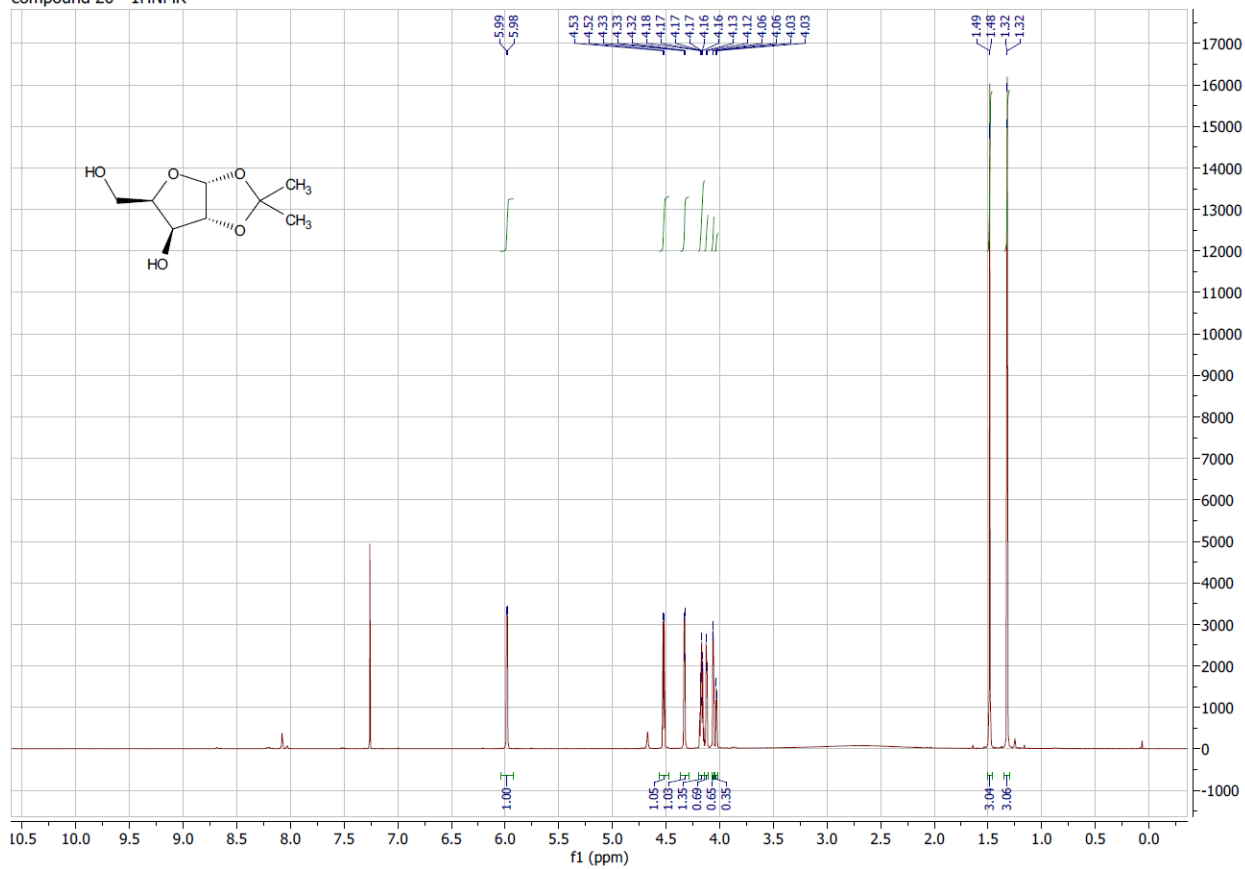



compound 20 - 13CNMR

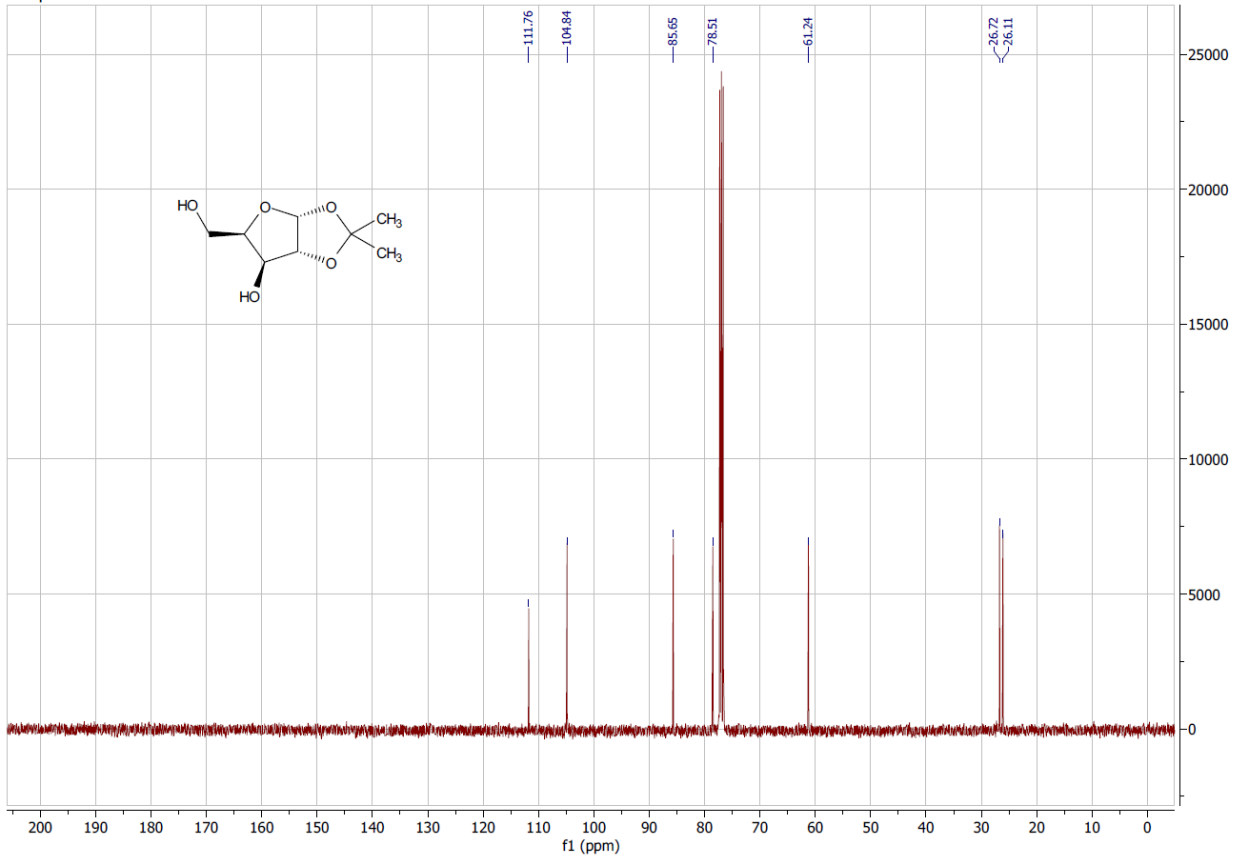

compound 21 - 1HNMR

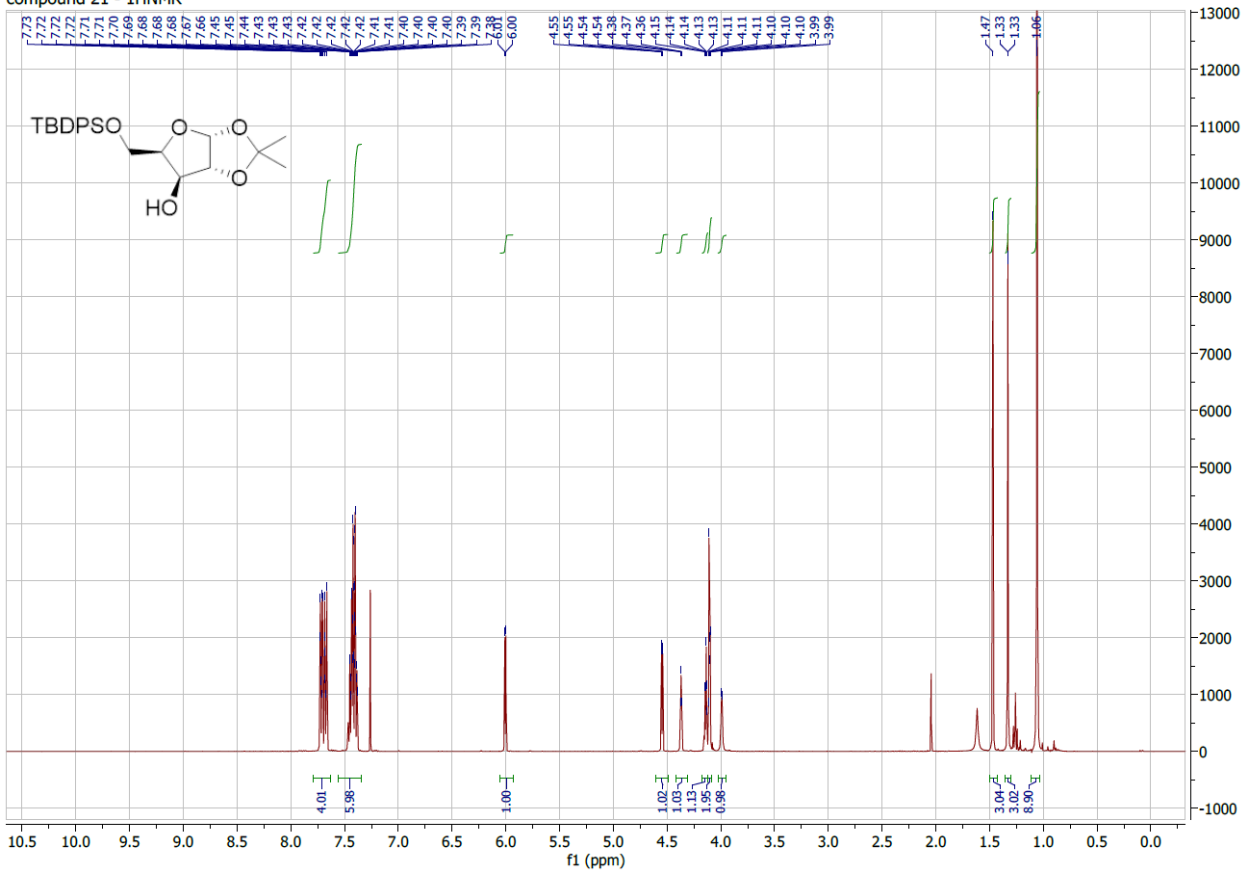



compound 22 - <sup>13</sup>CNMR

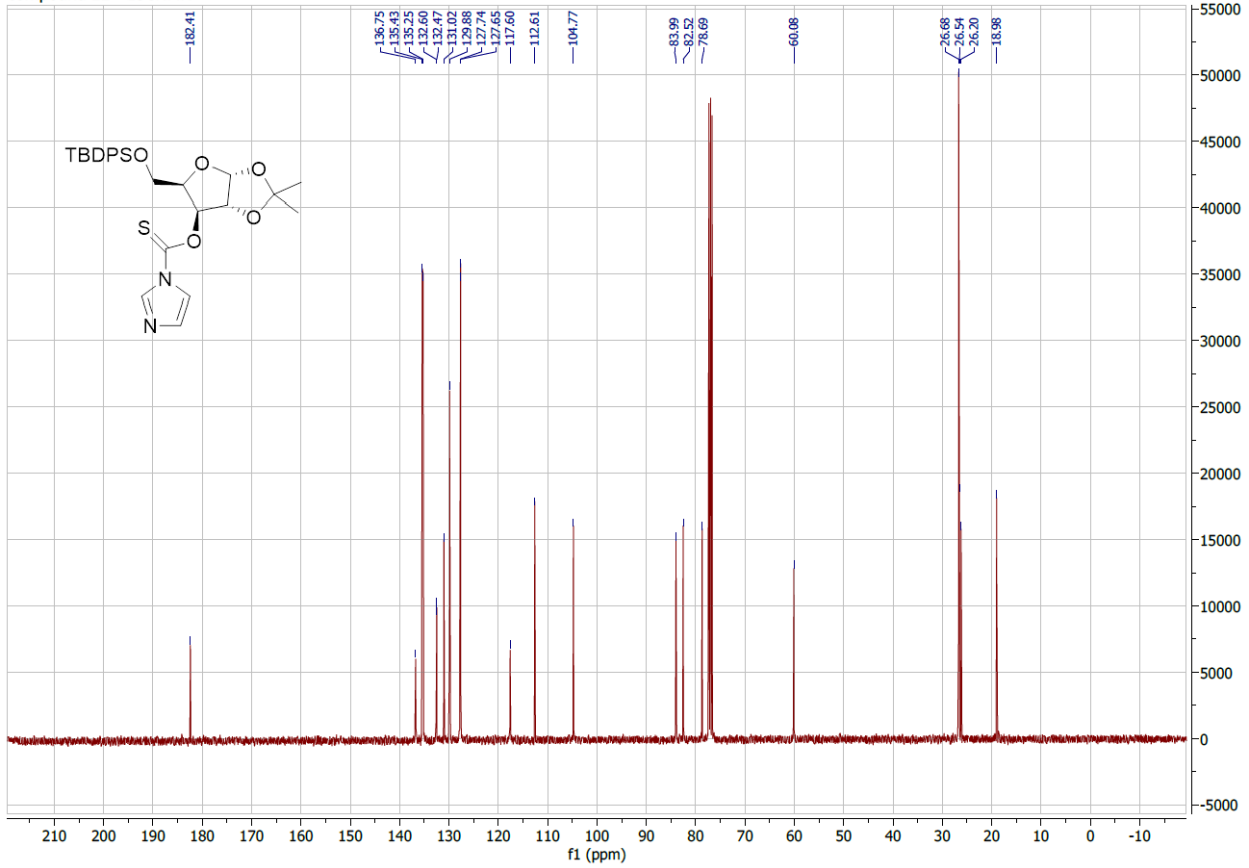

compound 23 - <sup>1</sup>HNMR

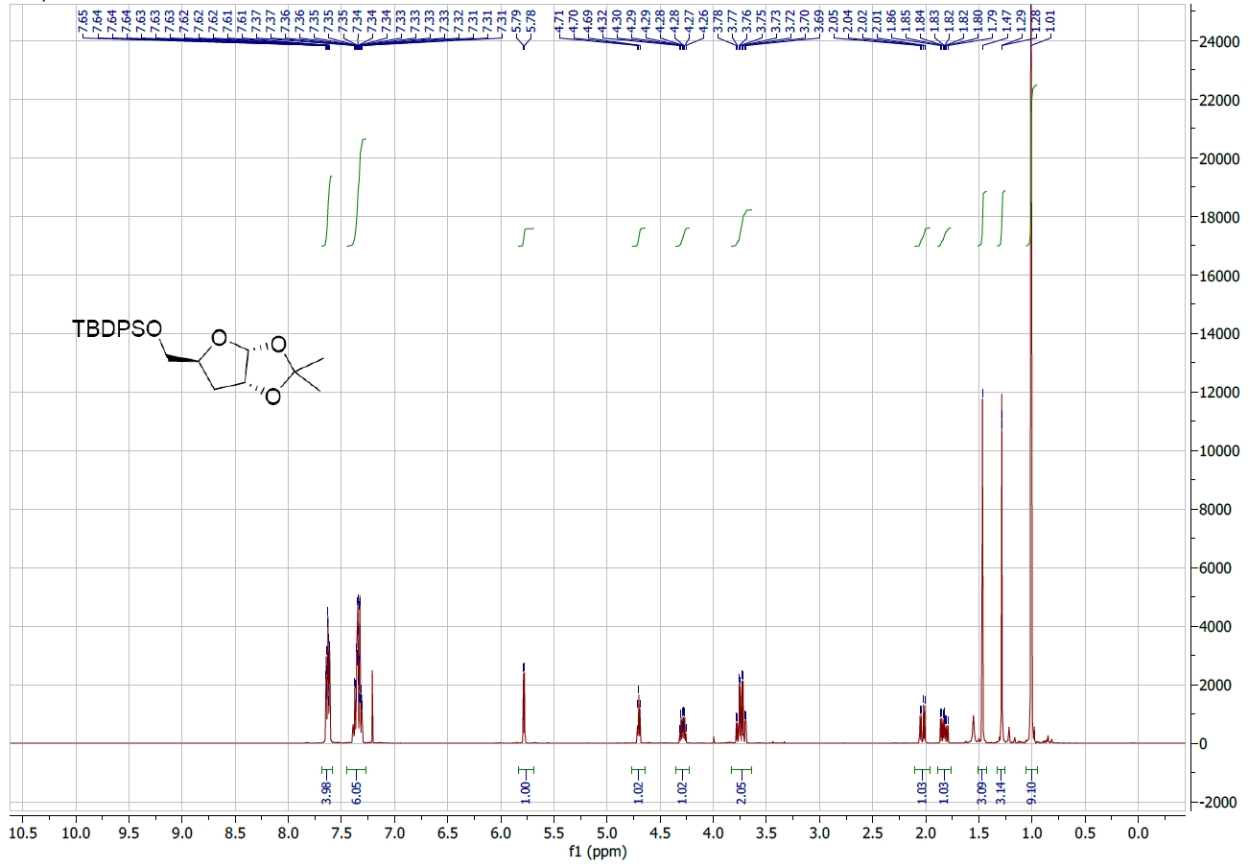

compound 23 - <sup>13</sup>CNMR

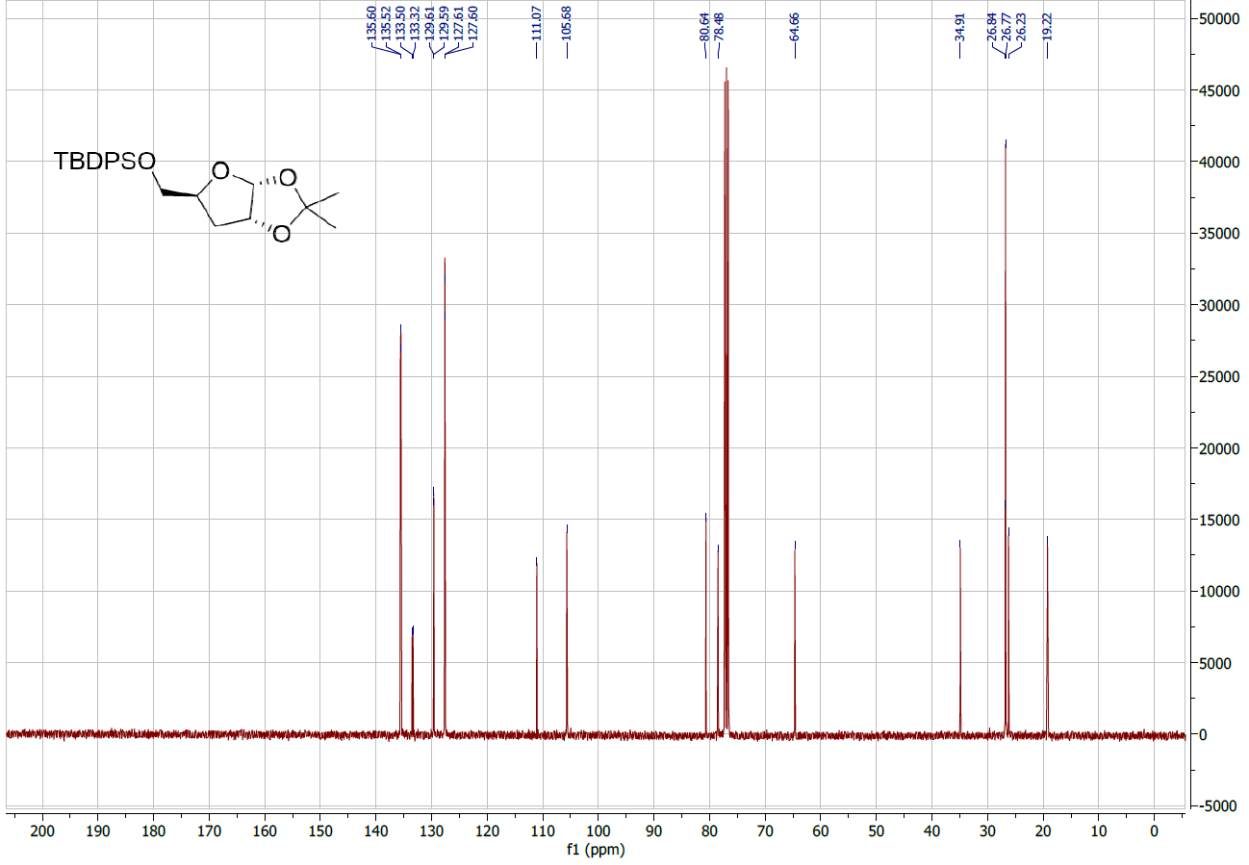

compound 24 - <sup>1</sup>H NMR

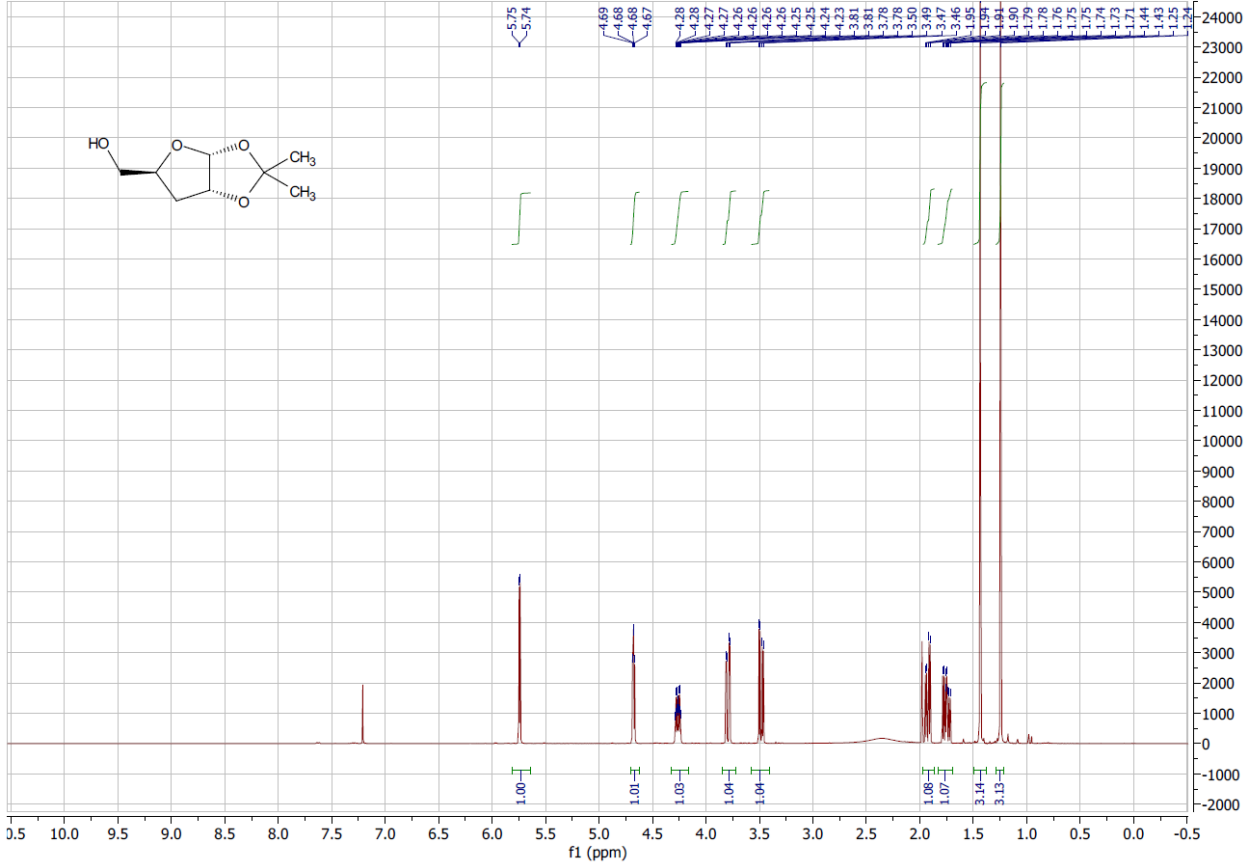

compound 24 - 13CNMR

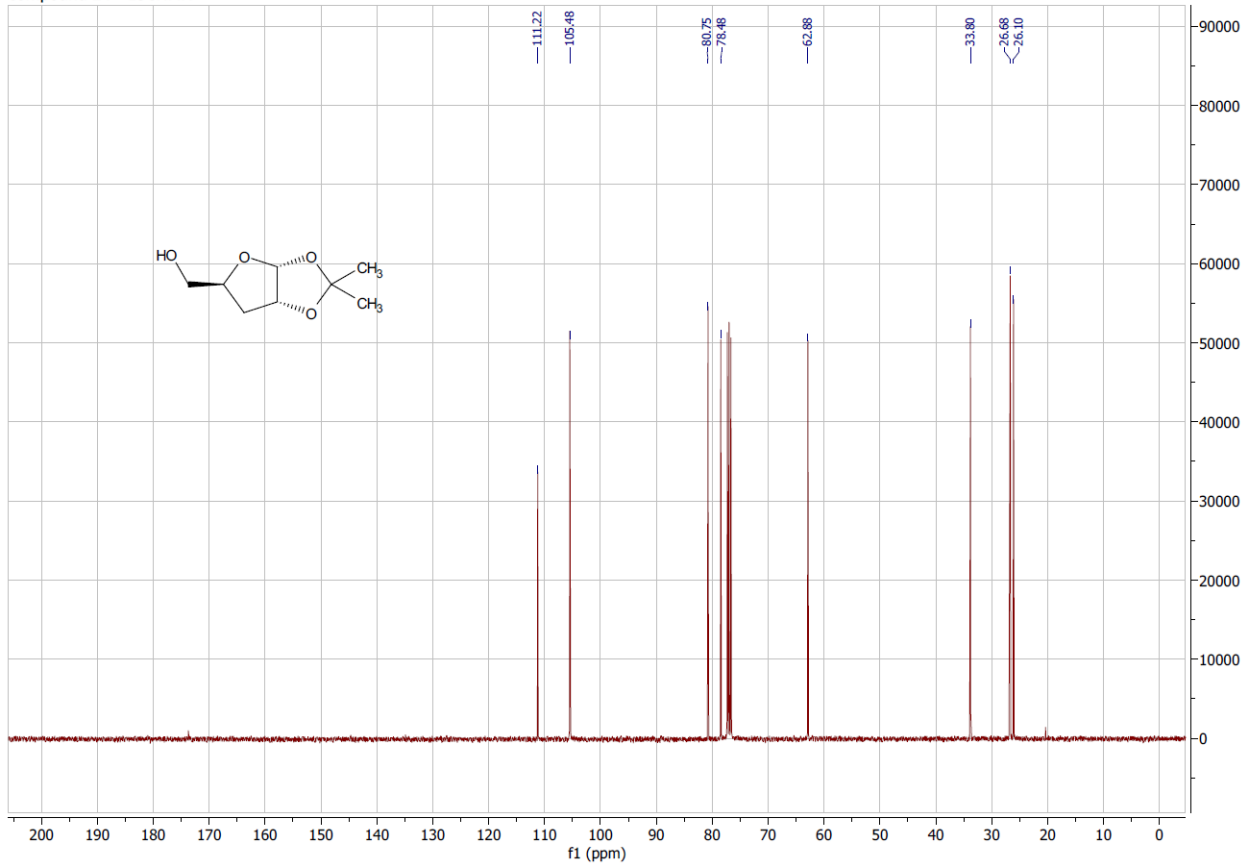

compound 25 - 1HNMR

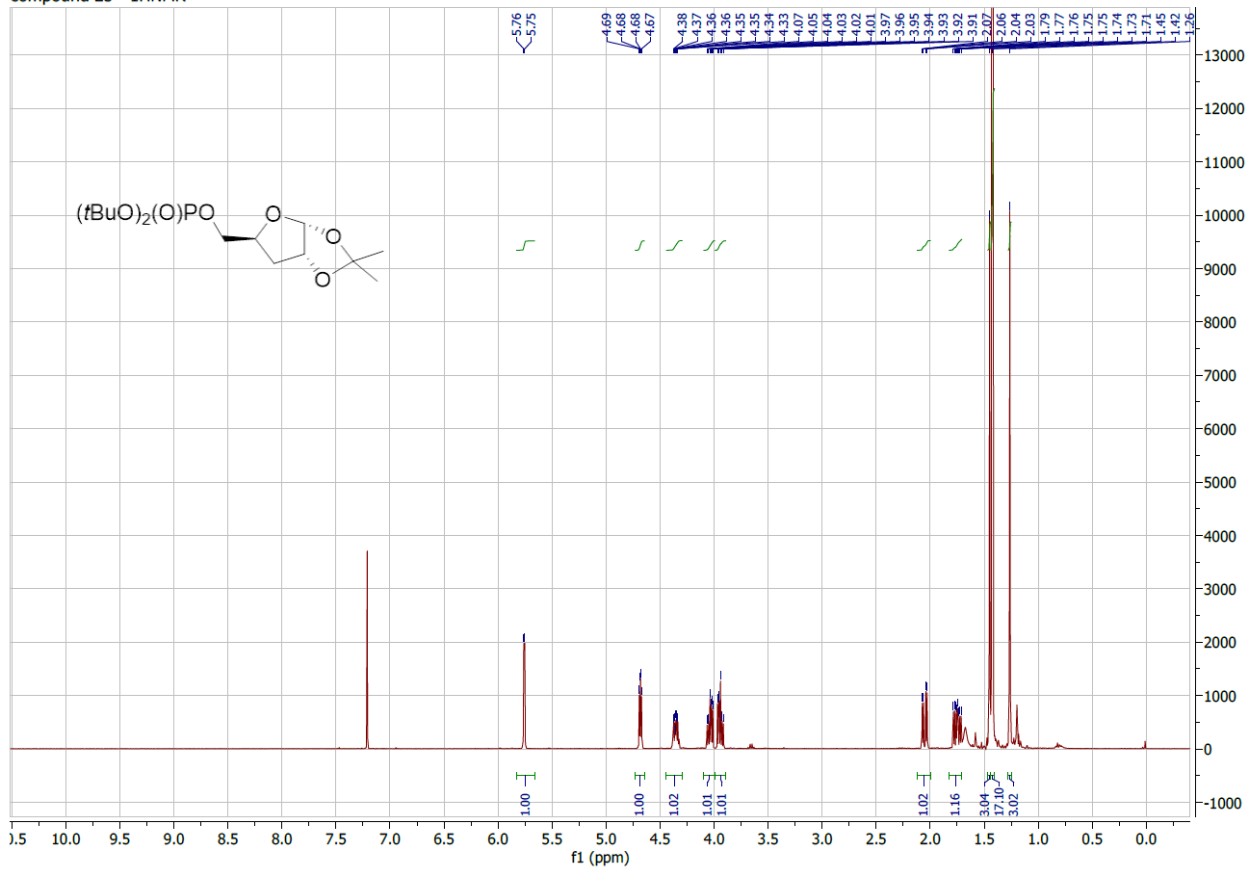

compound 25 - <sup>13</sup>CNMR

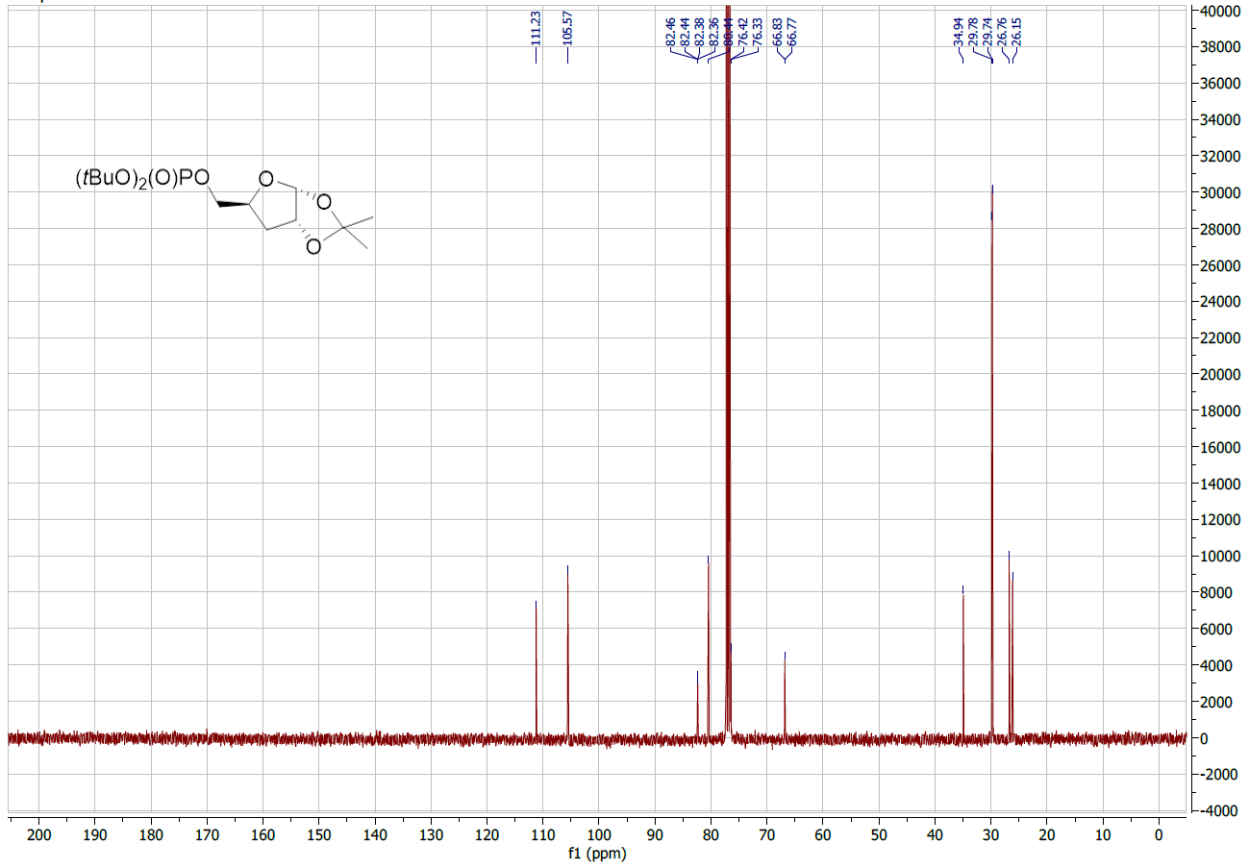

compound 25 - <sup>31</sup>PNMR

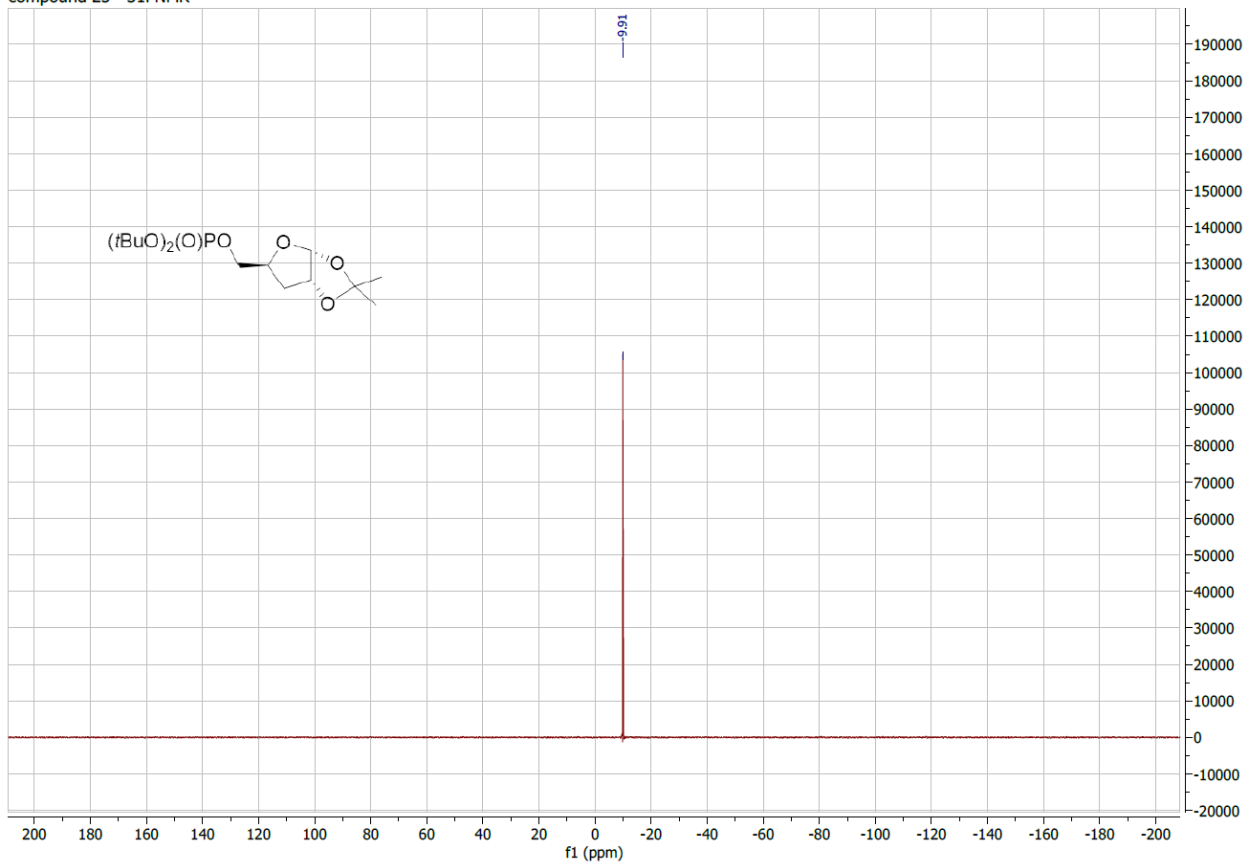

compound 26 - 1HNMR

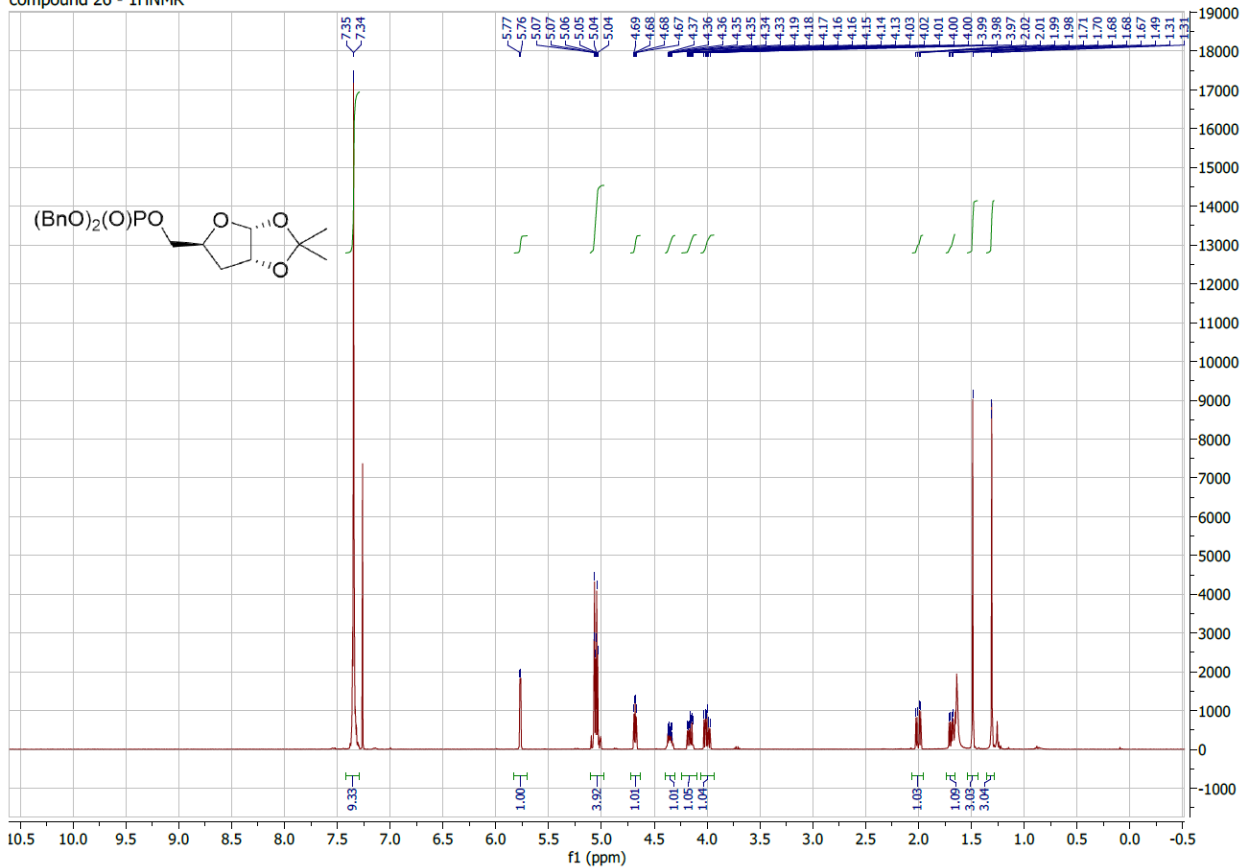

compound 26 - 13CNMR

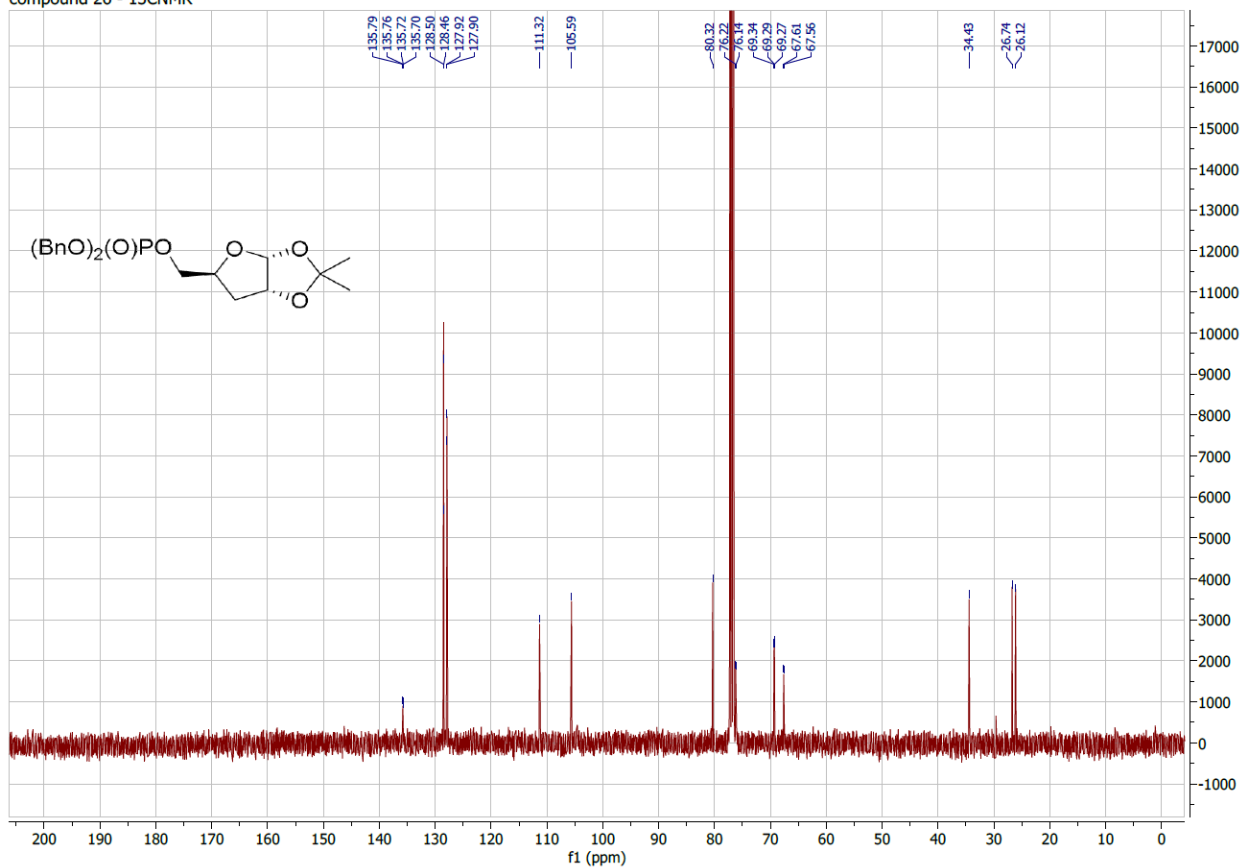

compound 26 - 31PNMR

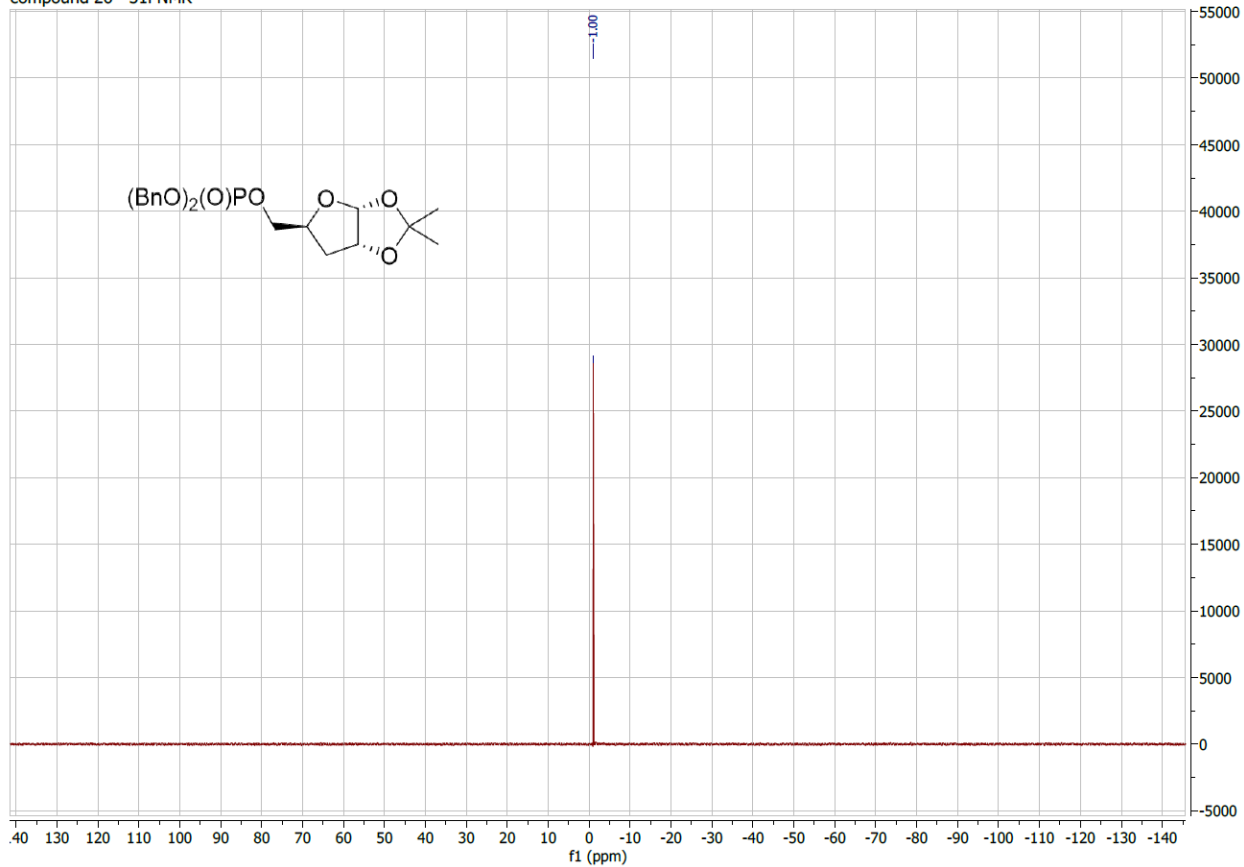

compound 27 - 1HNMR

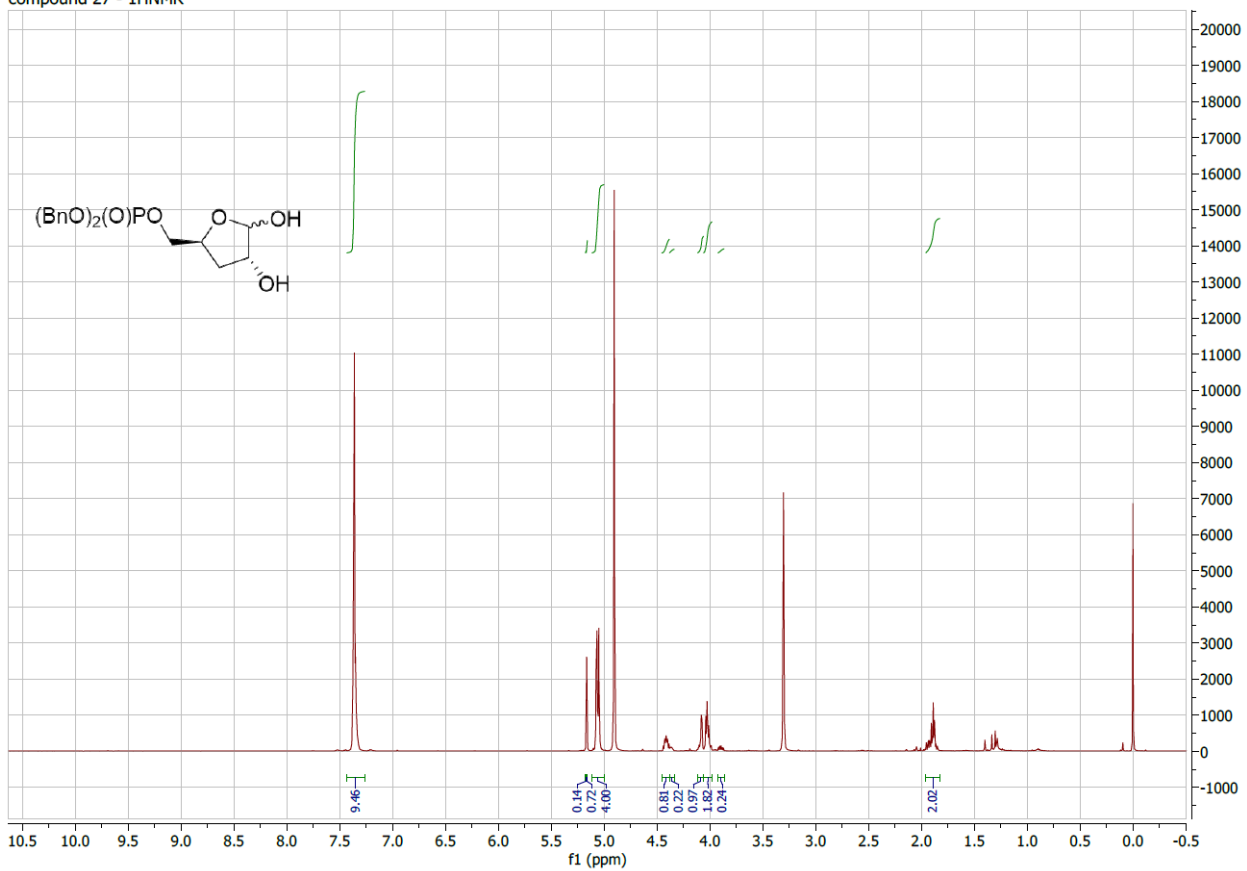



compound 27 - <sup>13</sup>CNMR

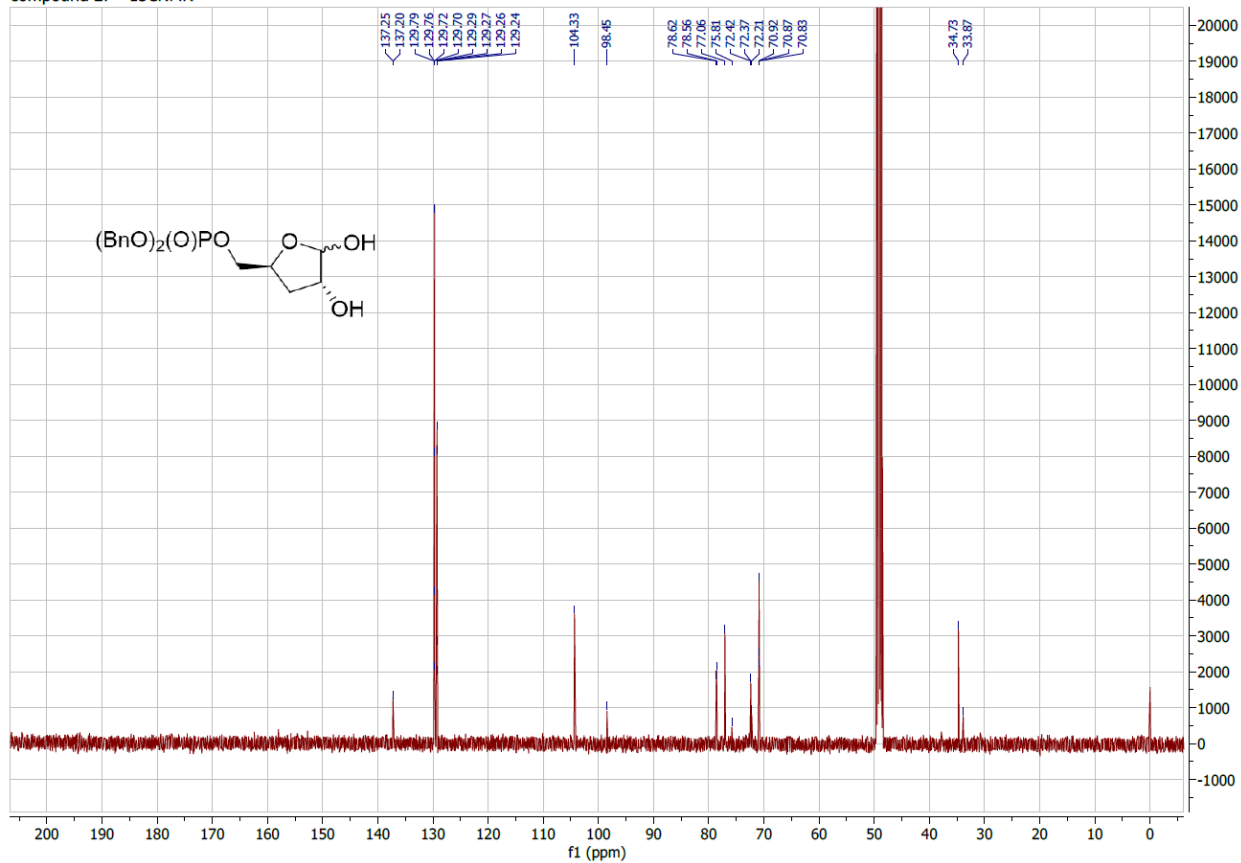

compound 27 - <sup>31</sup>PNMR

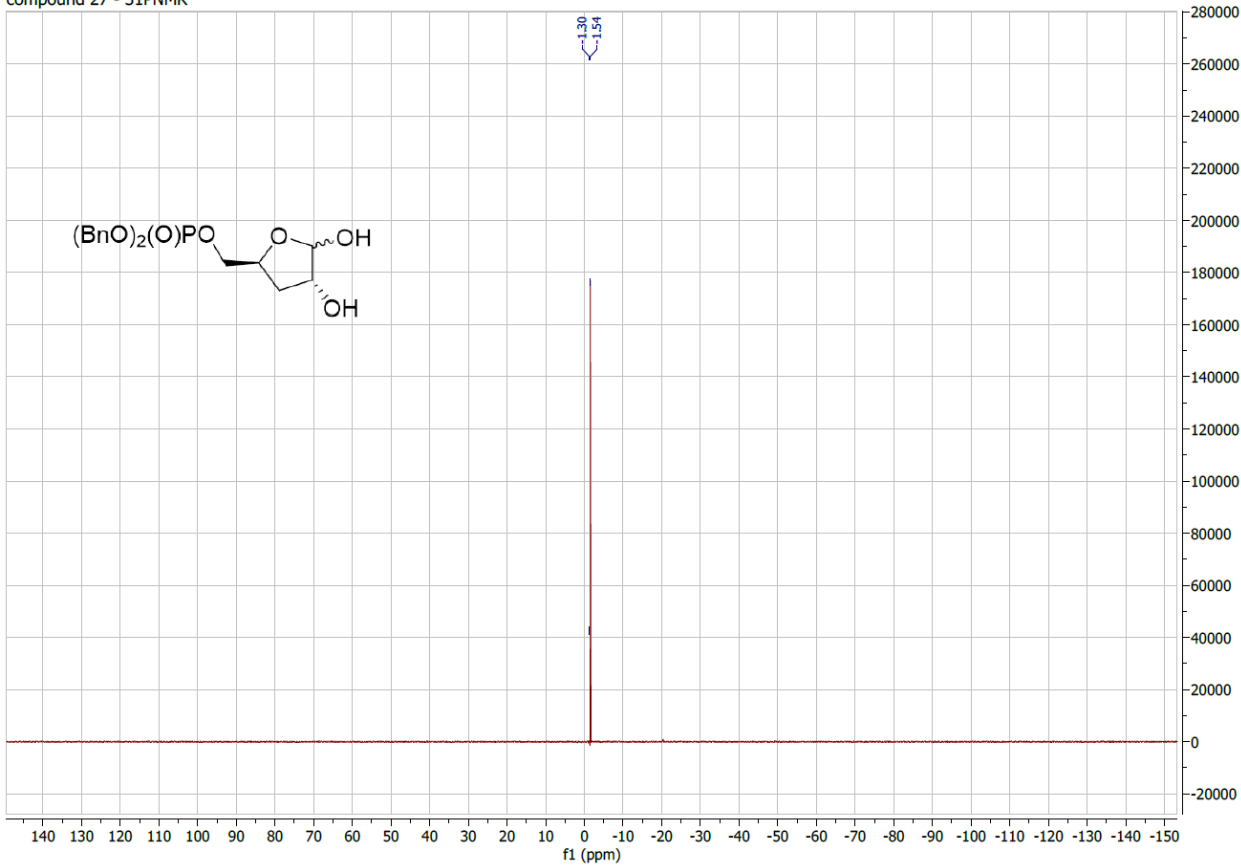

compound 12 - 1HNMR

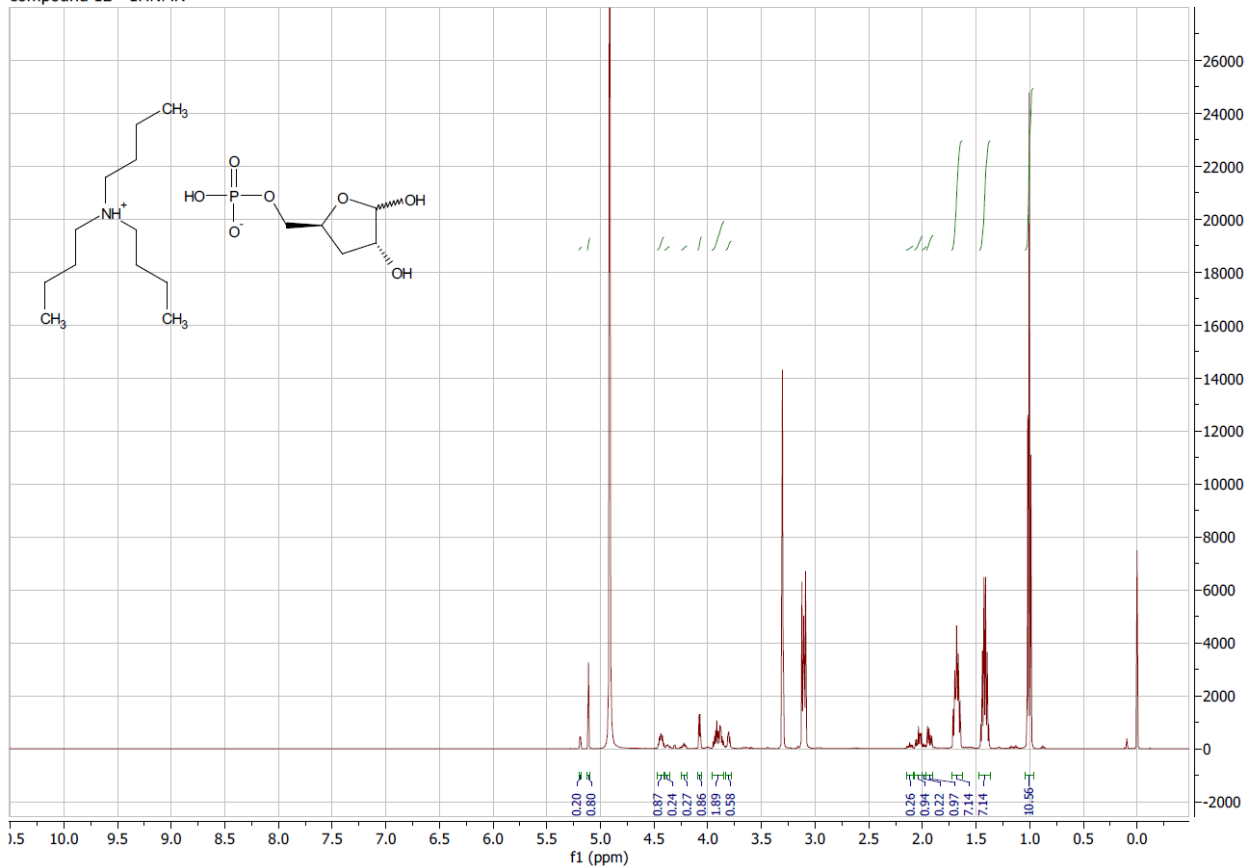

compound 12 - 13CNMR

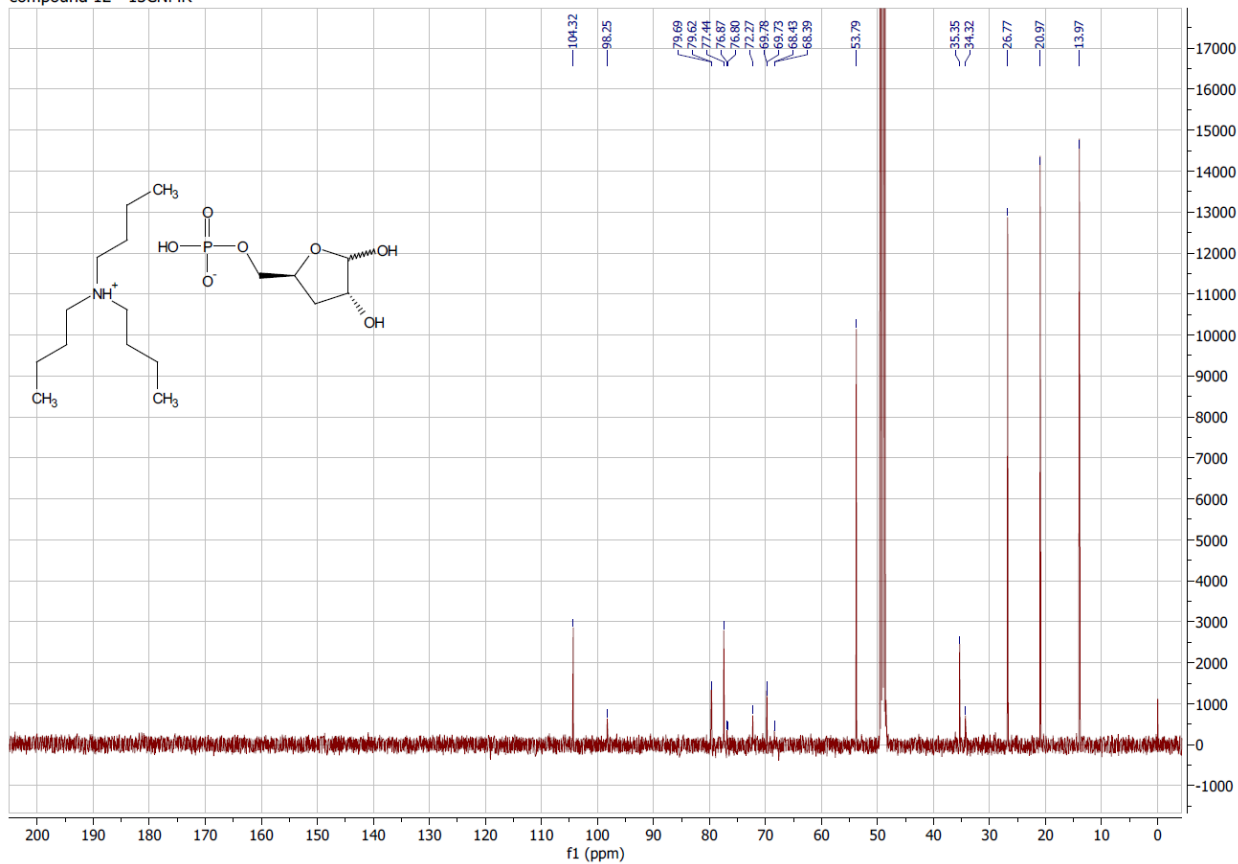

compound 12 - 31PNMR

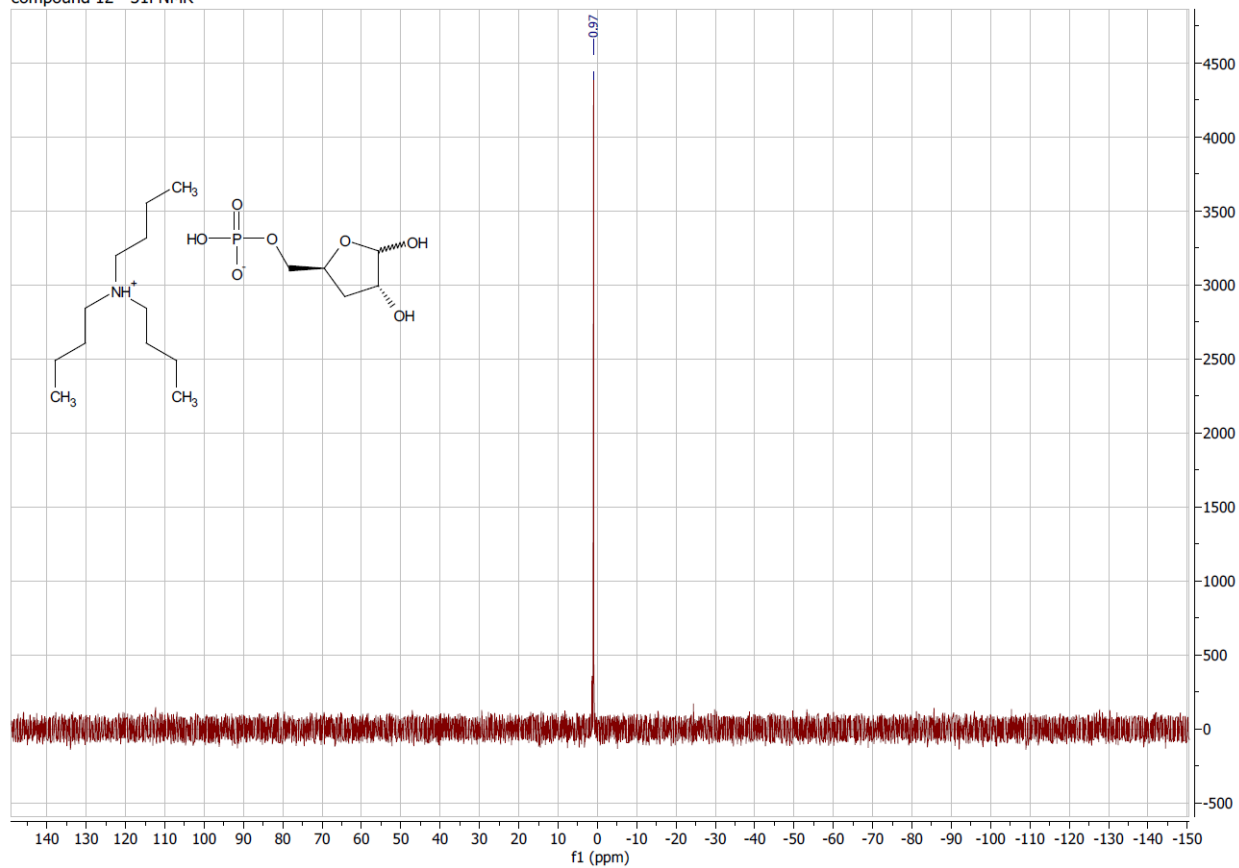

compound 30 - 1HNMR

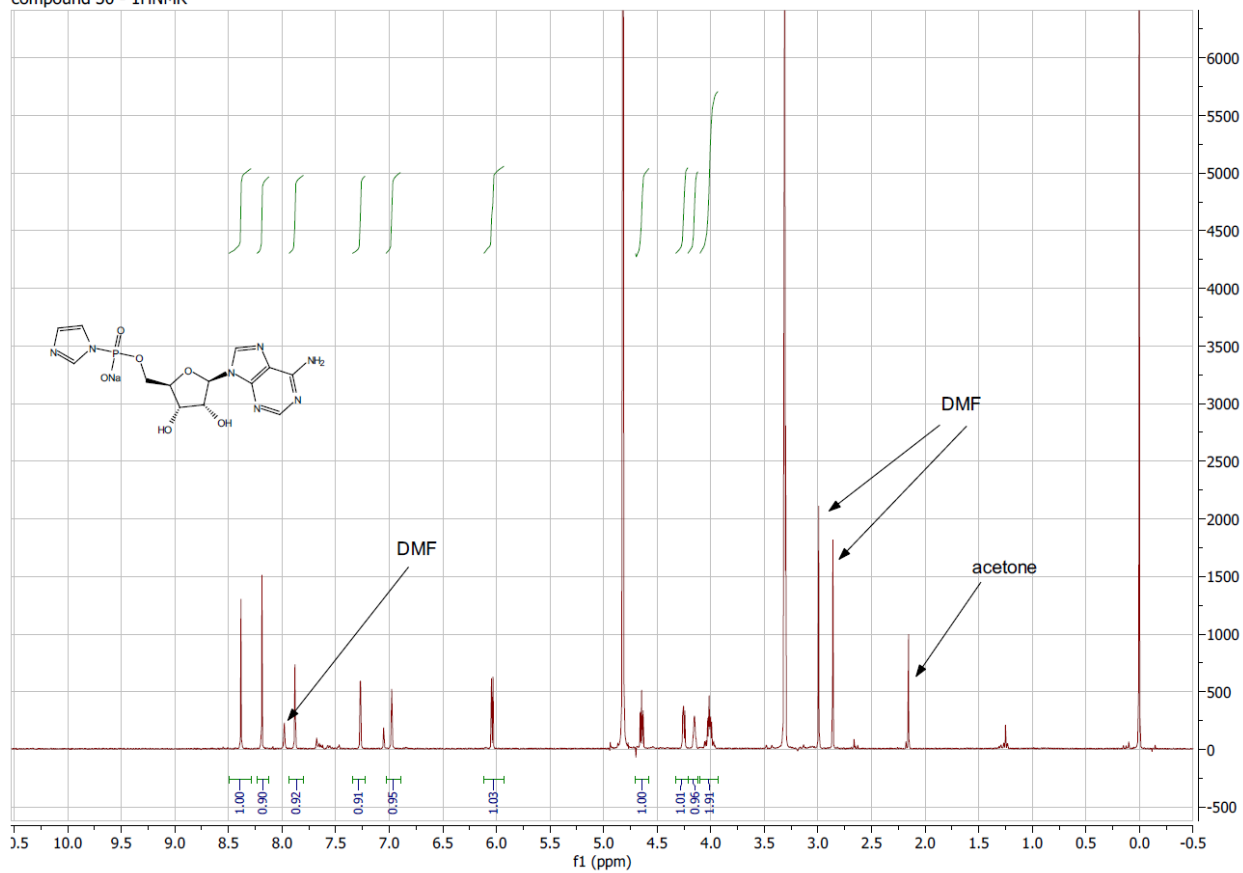

compound 30 - 13CNMR

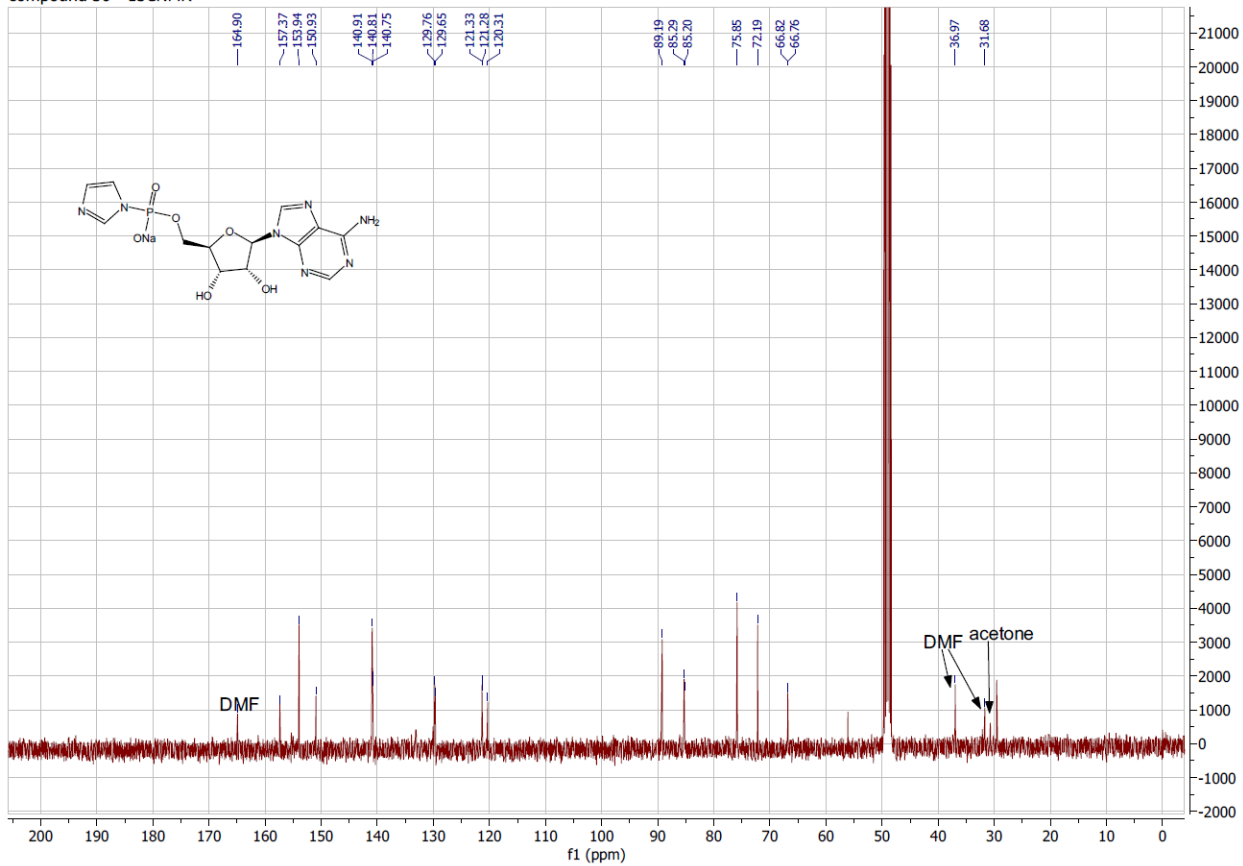

compound 30 - 31PNMR

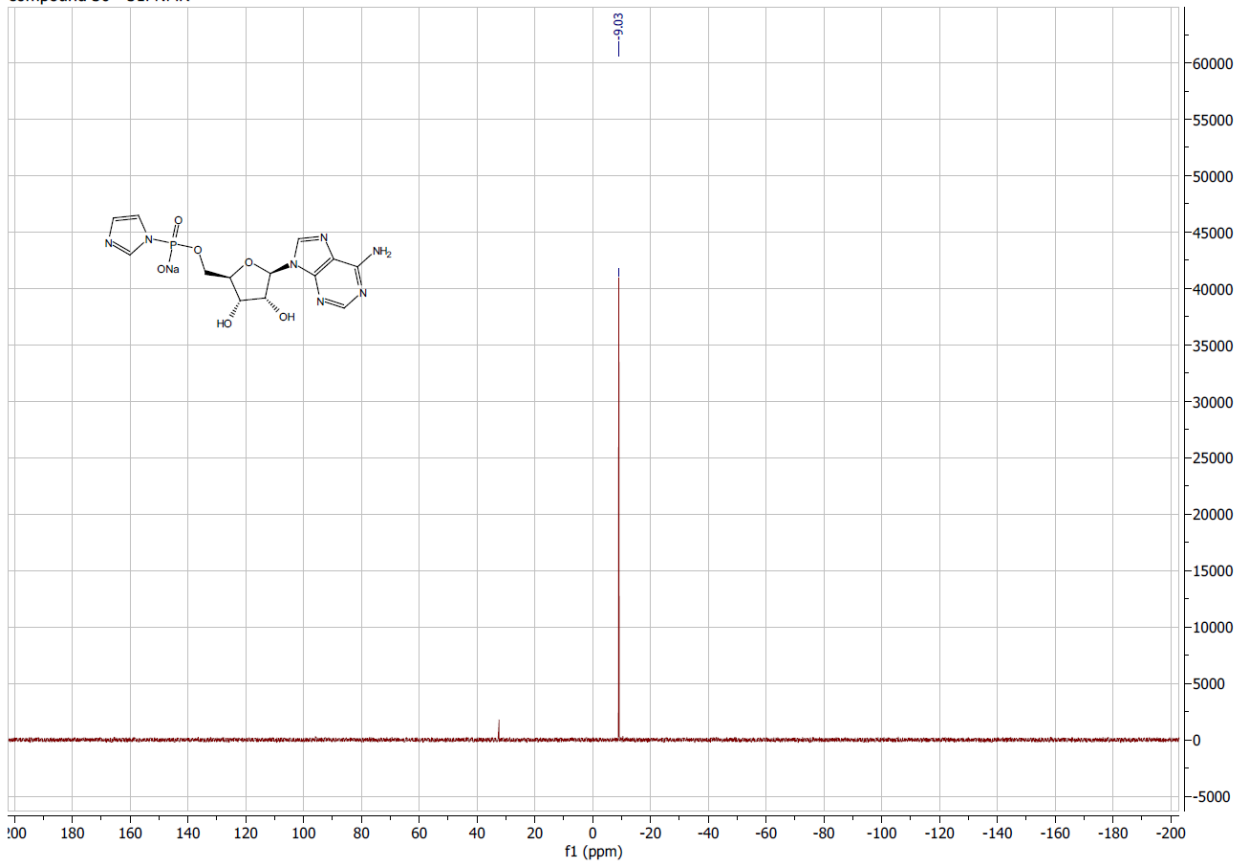

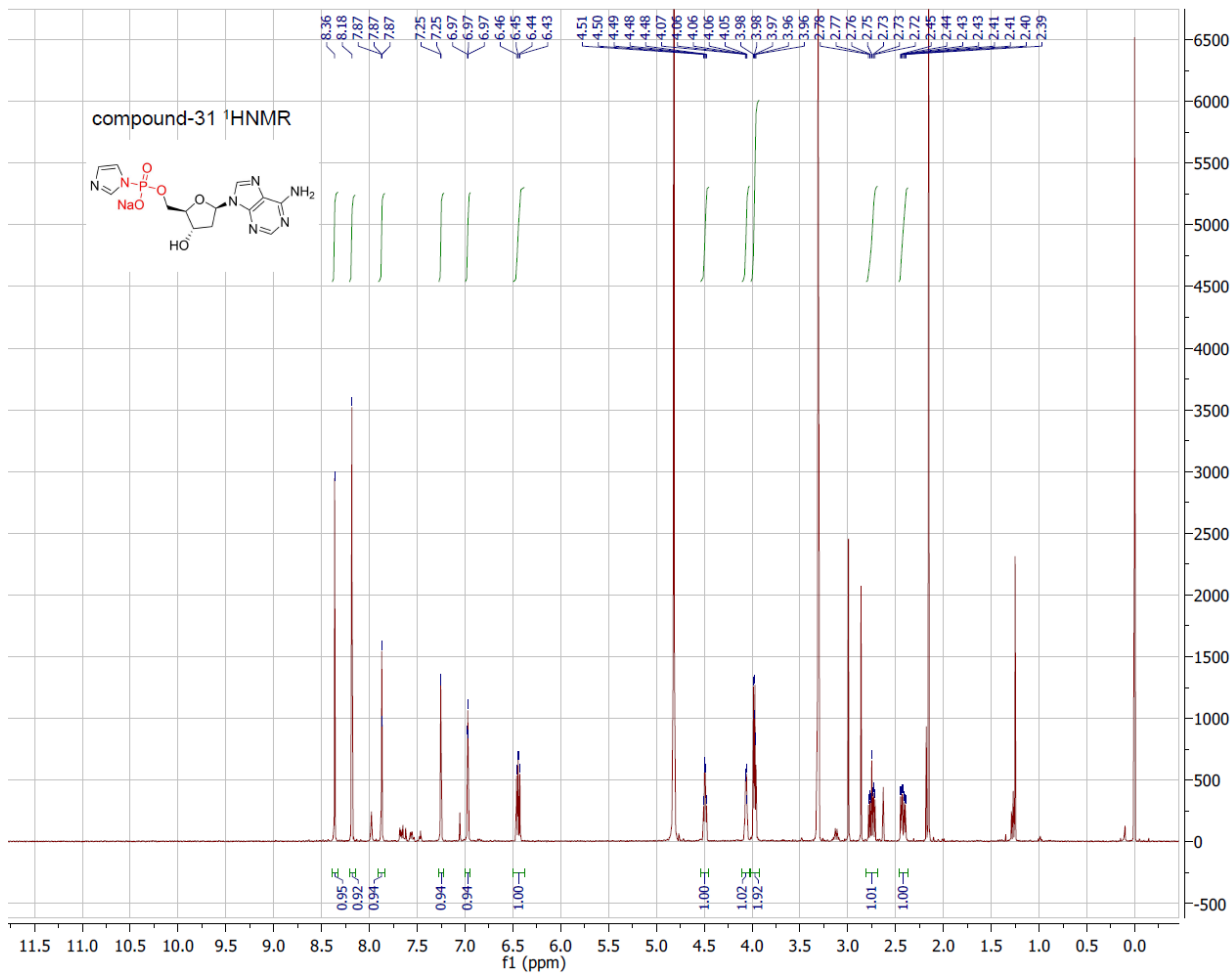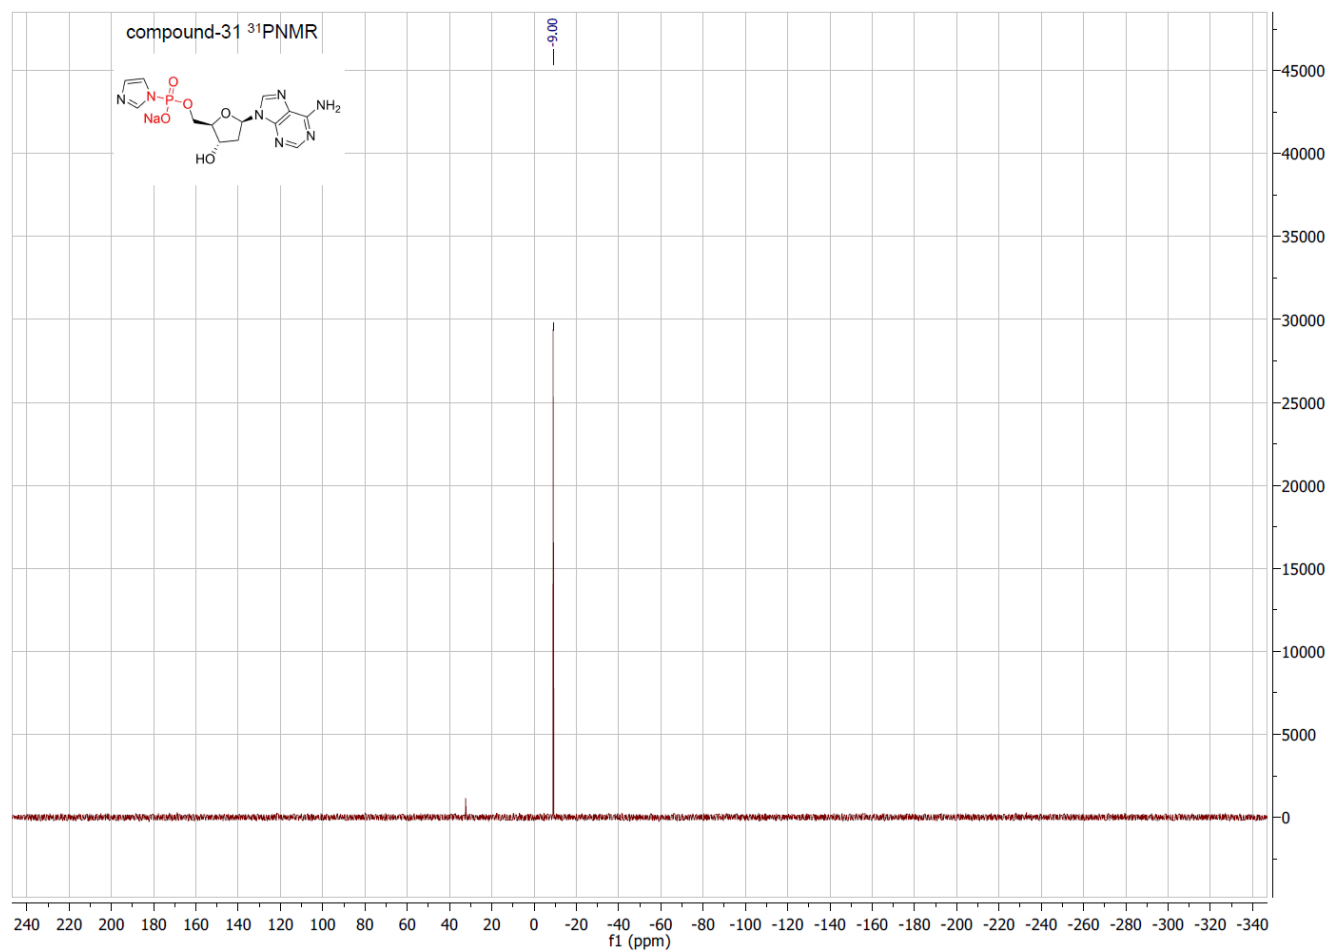

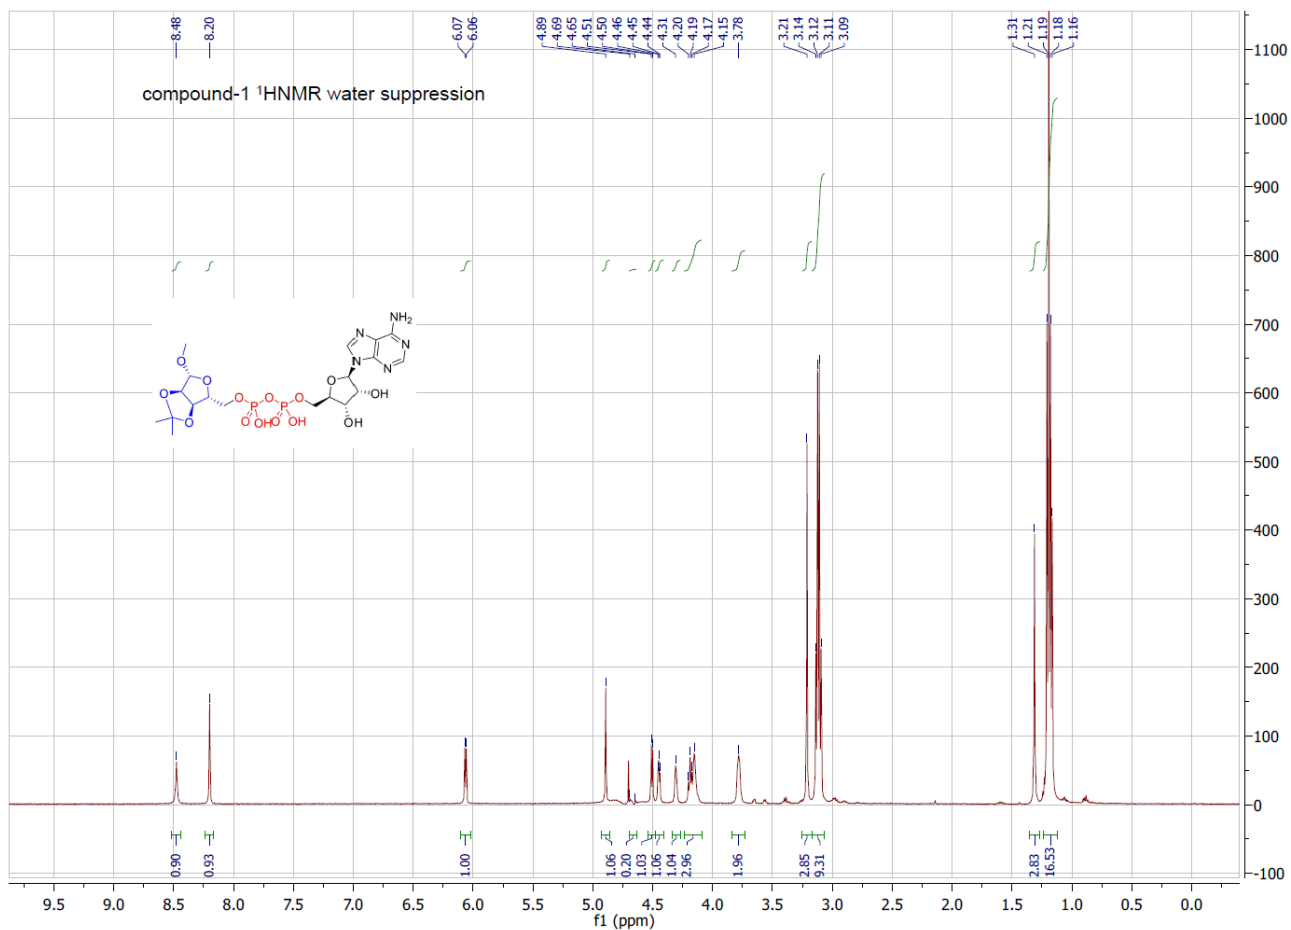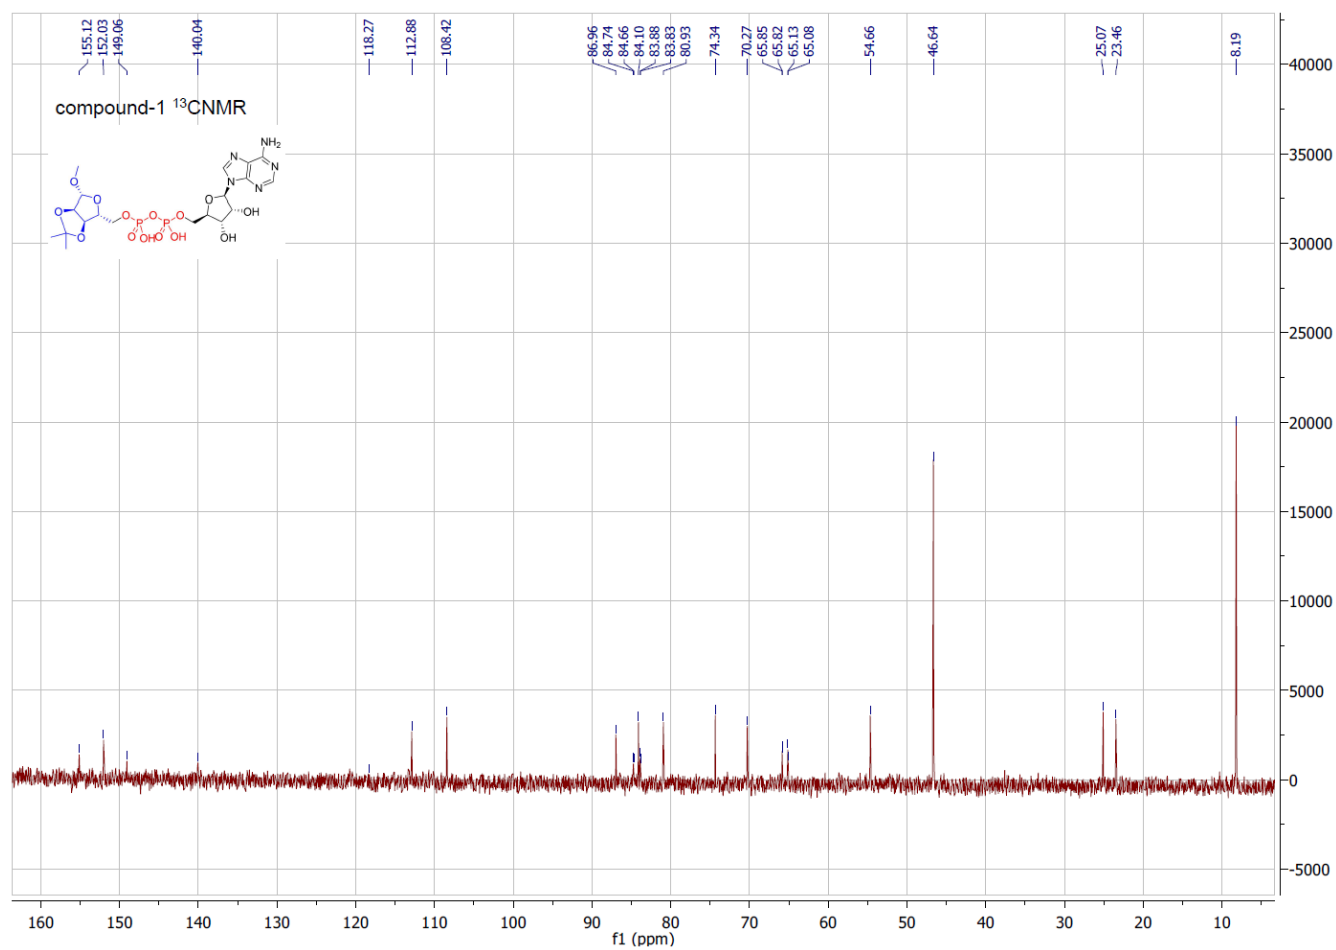

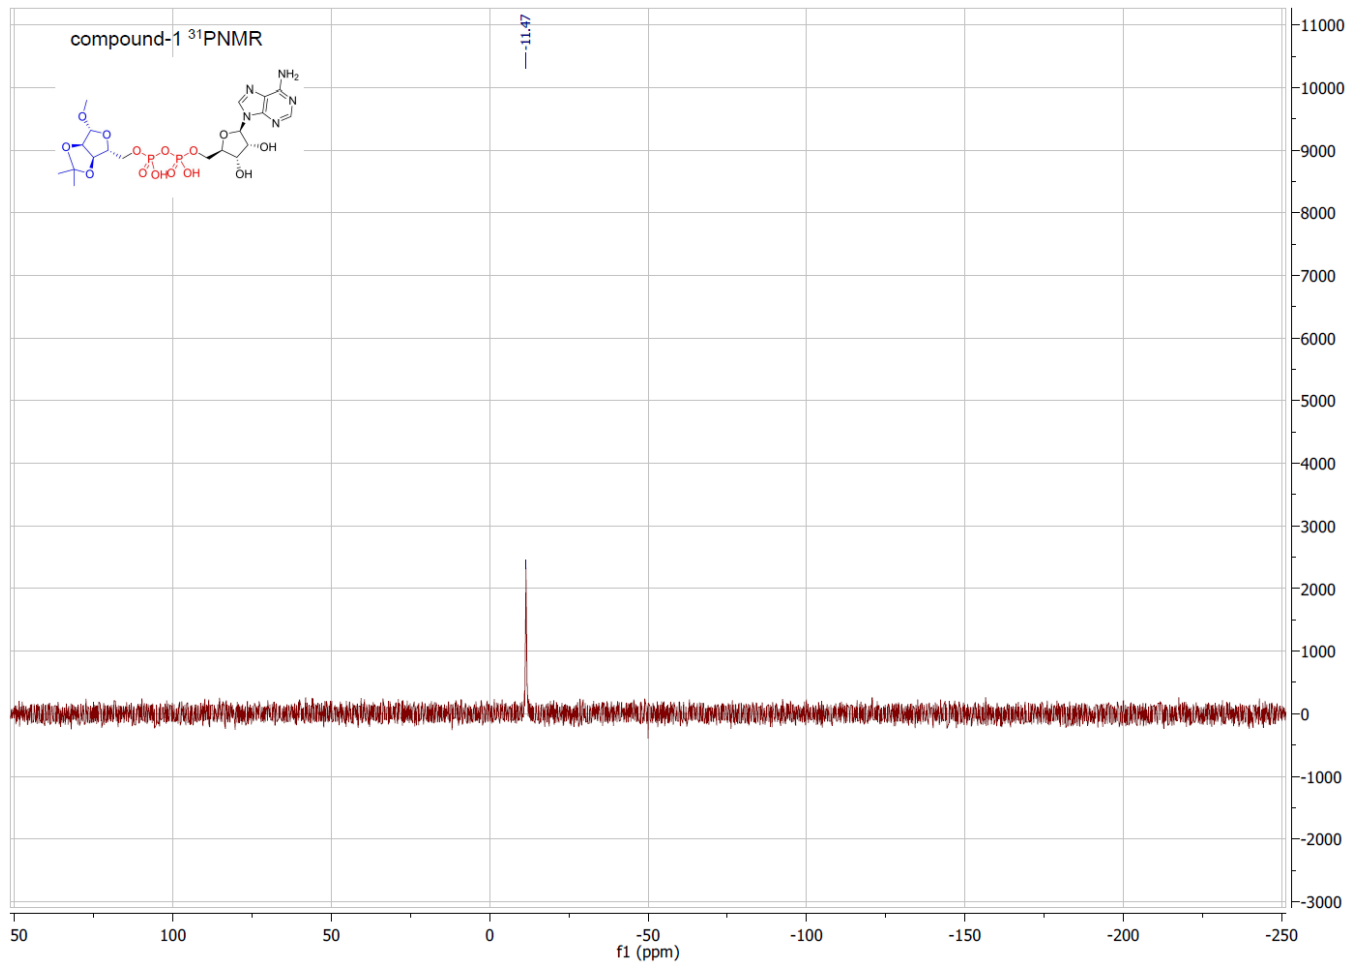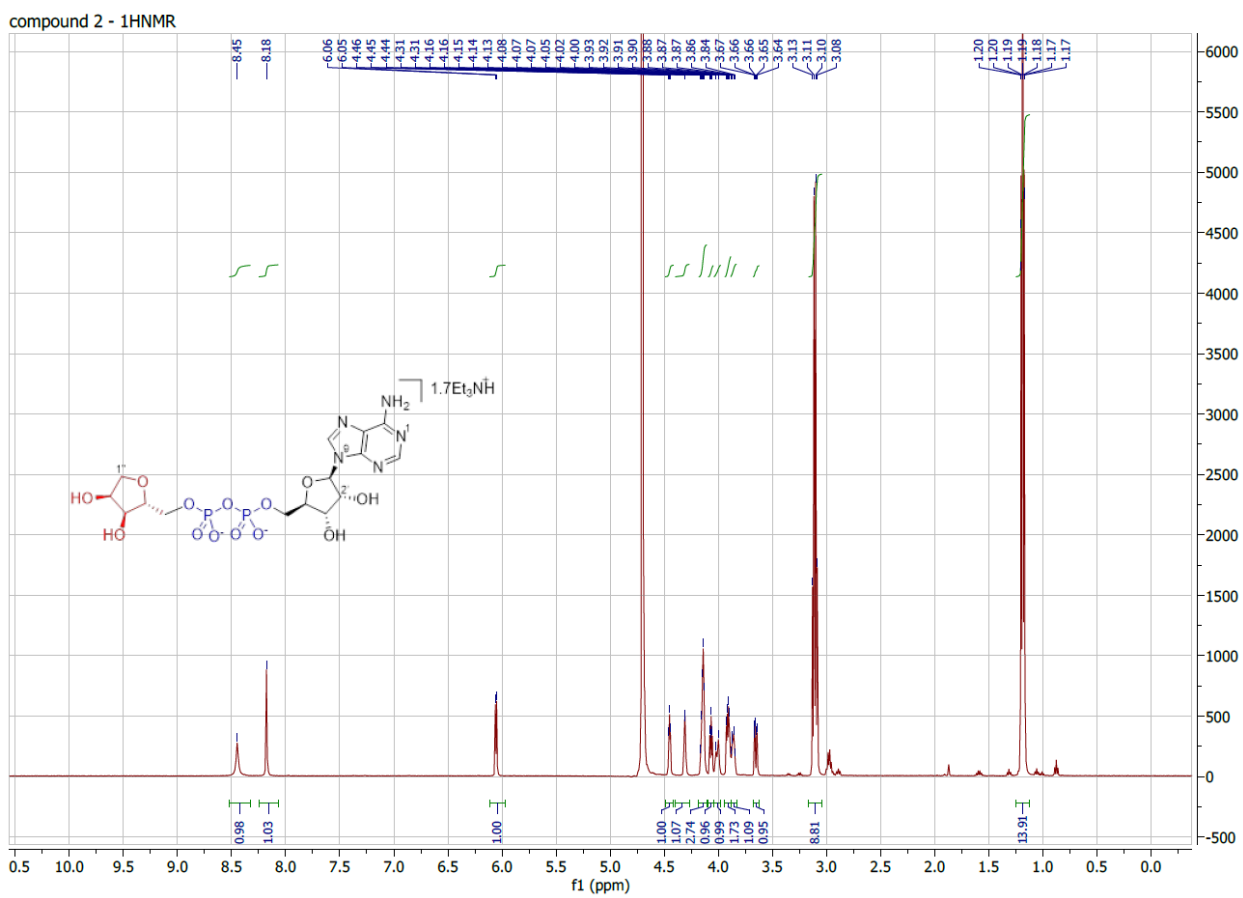

compound 2 - <sup>13</sup>CNMR

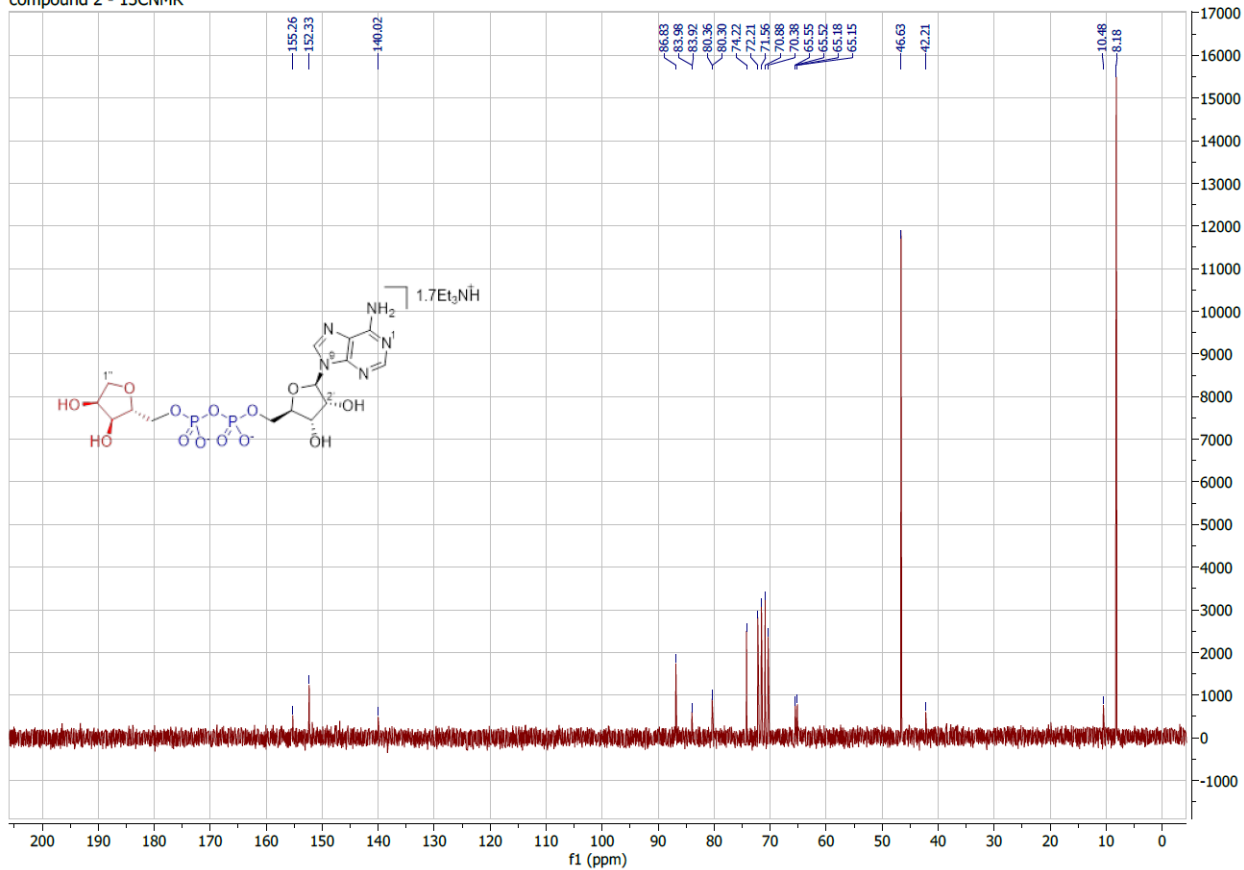

compound 2 - <sup>31</sup>PNMR

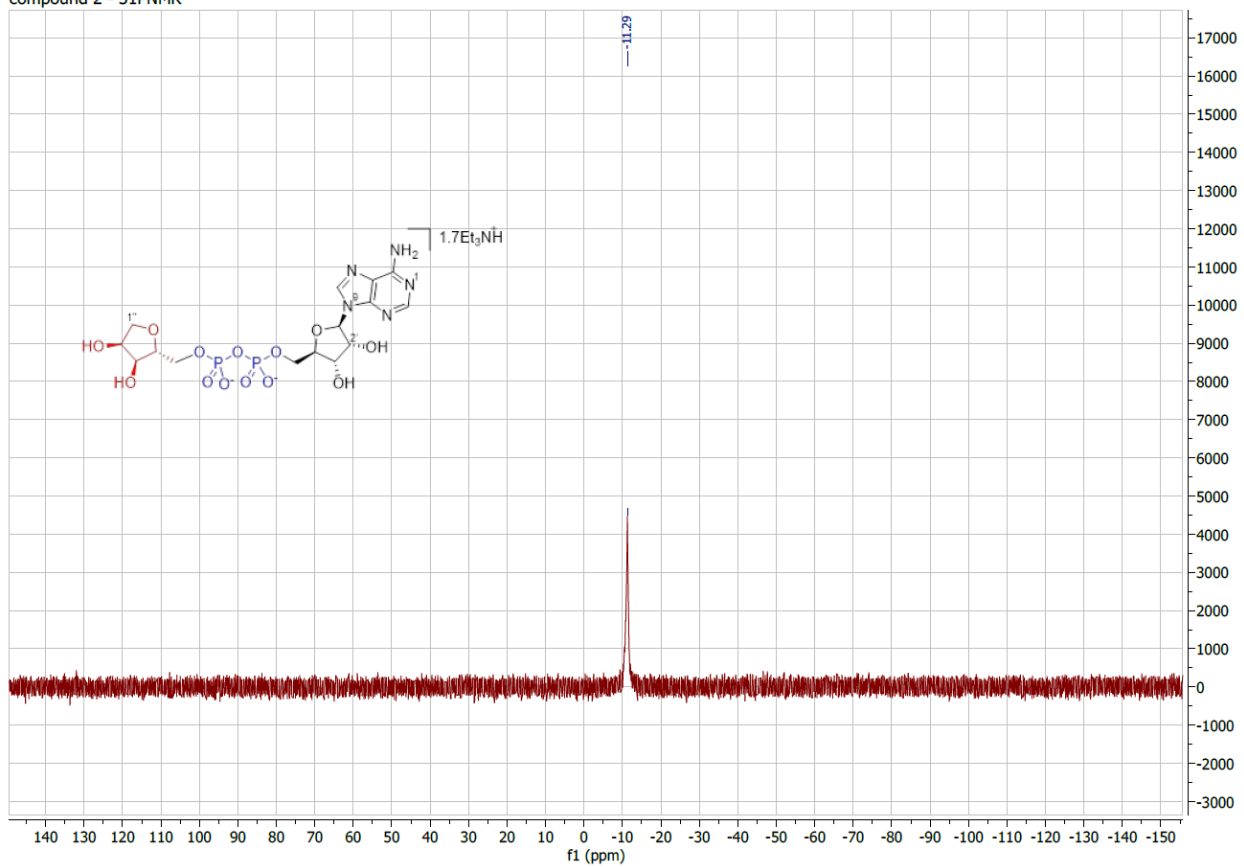



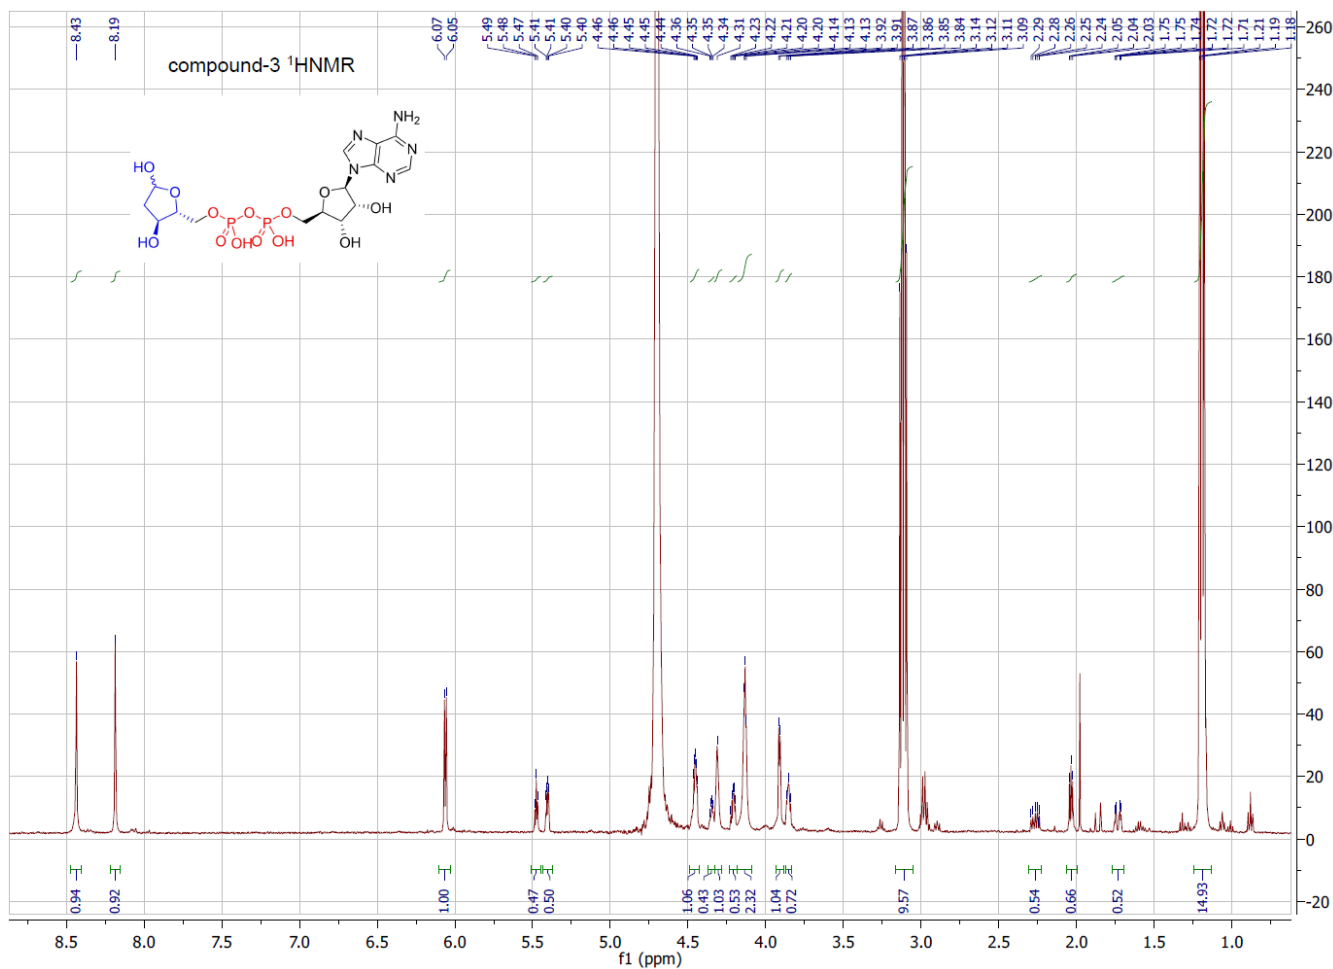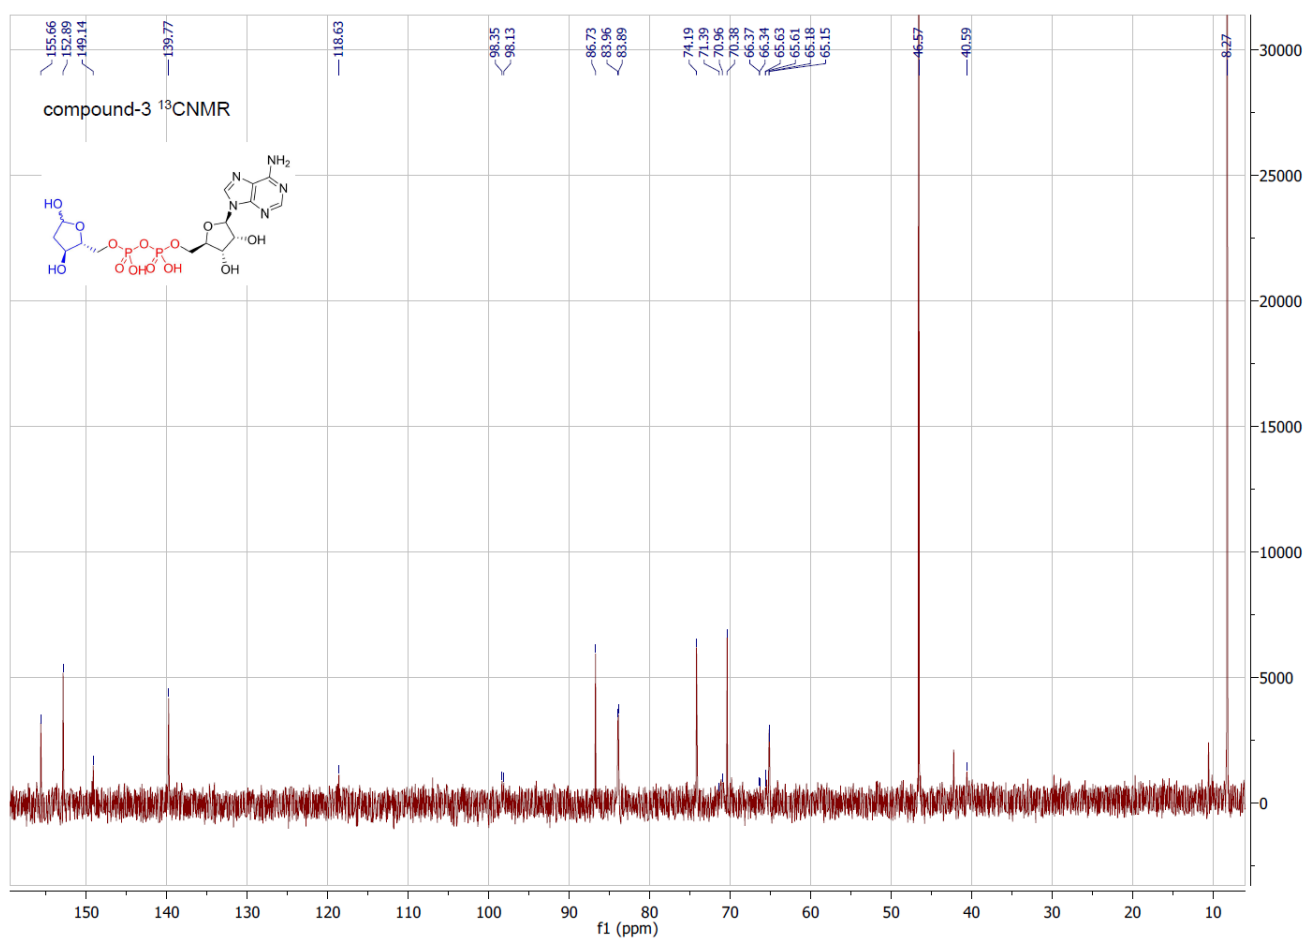

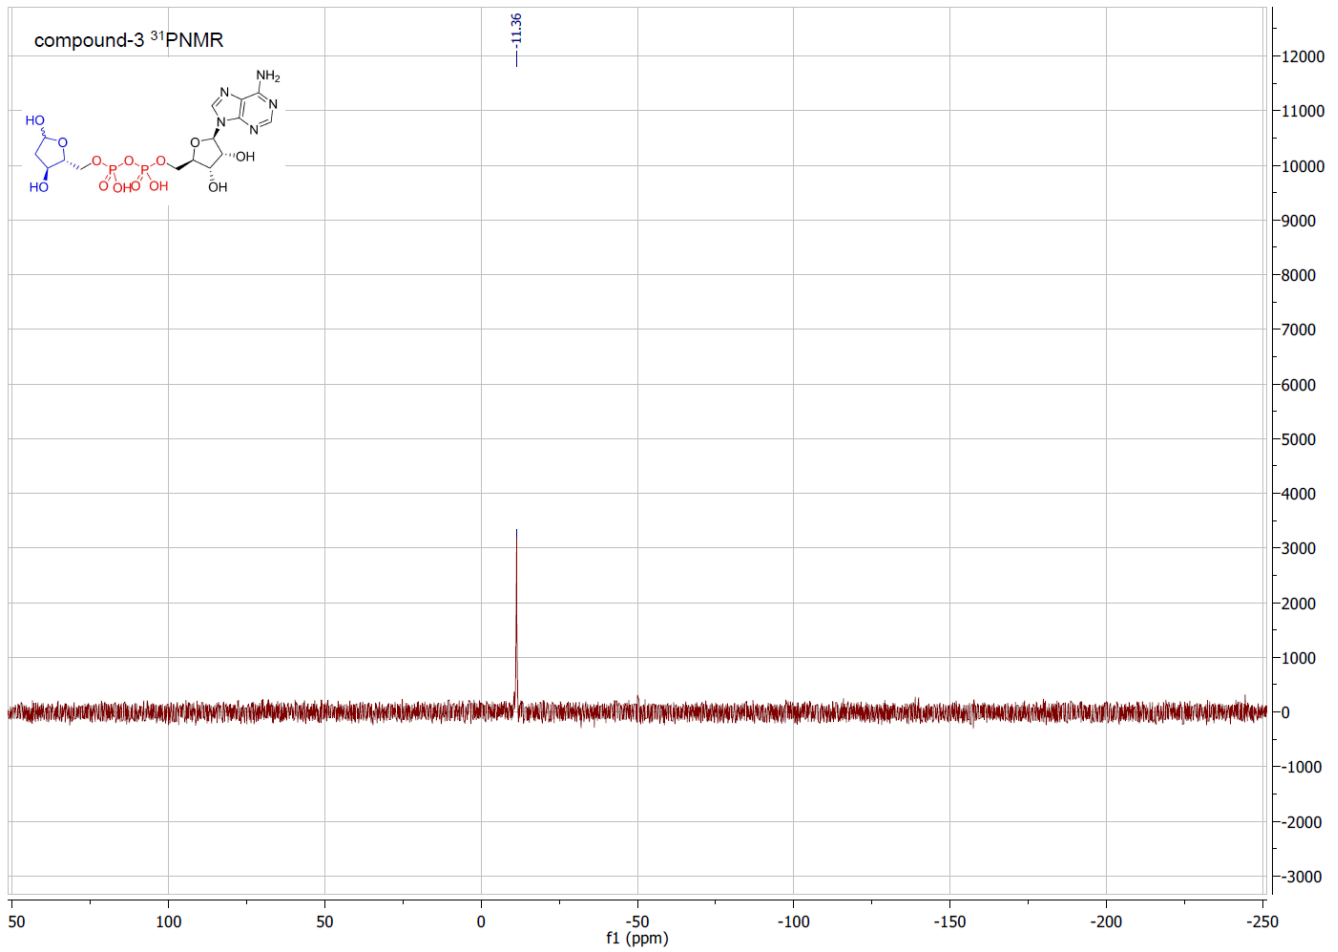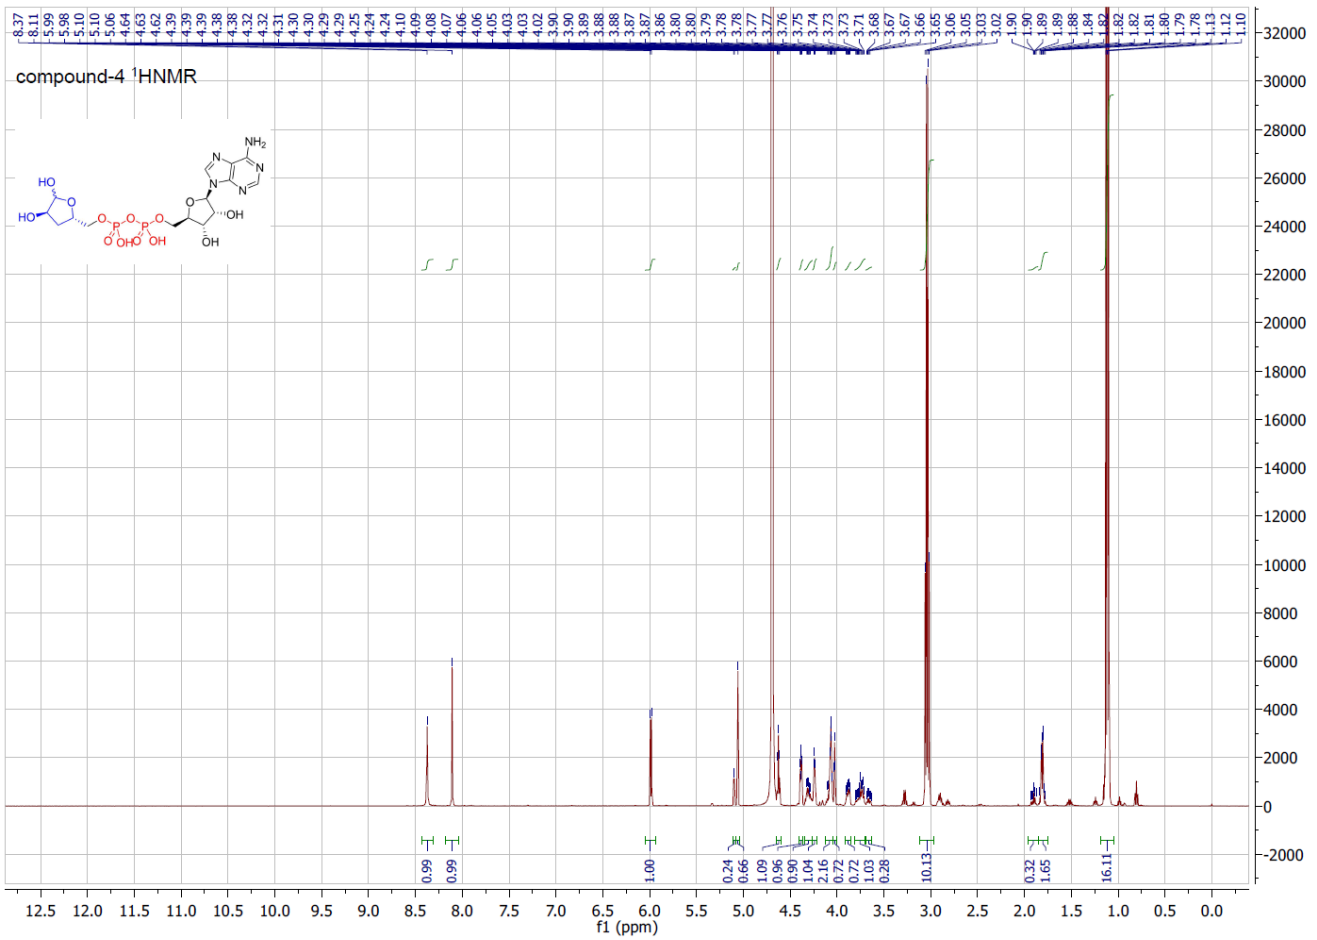

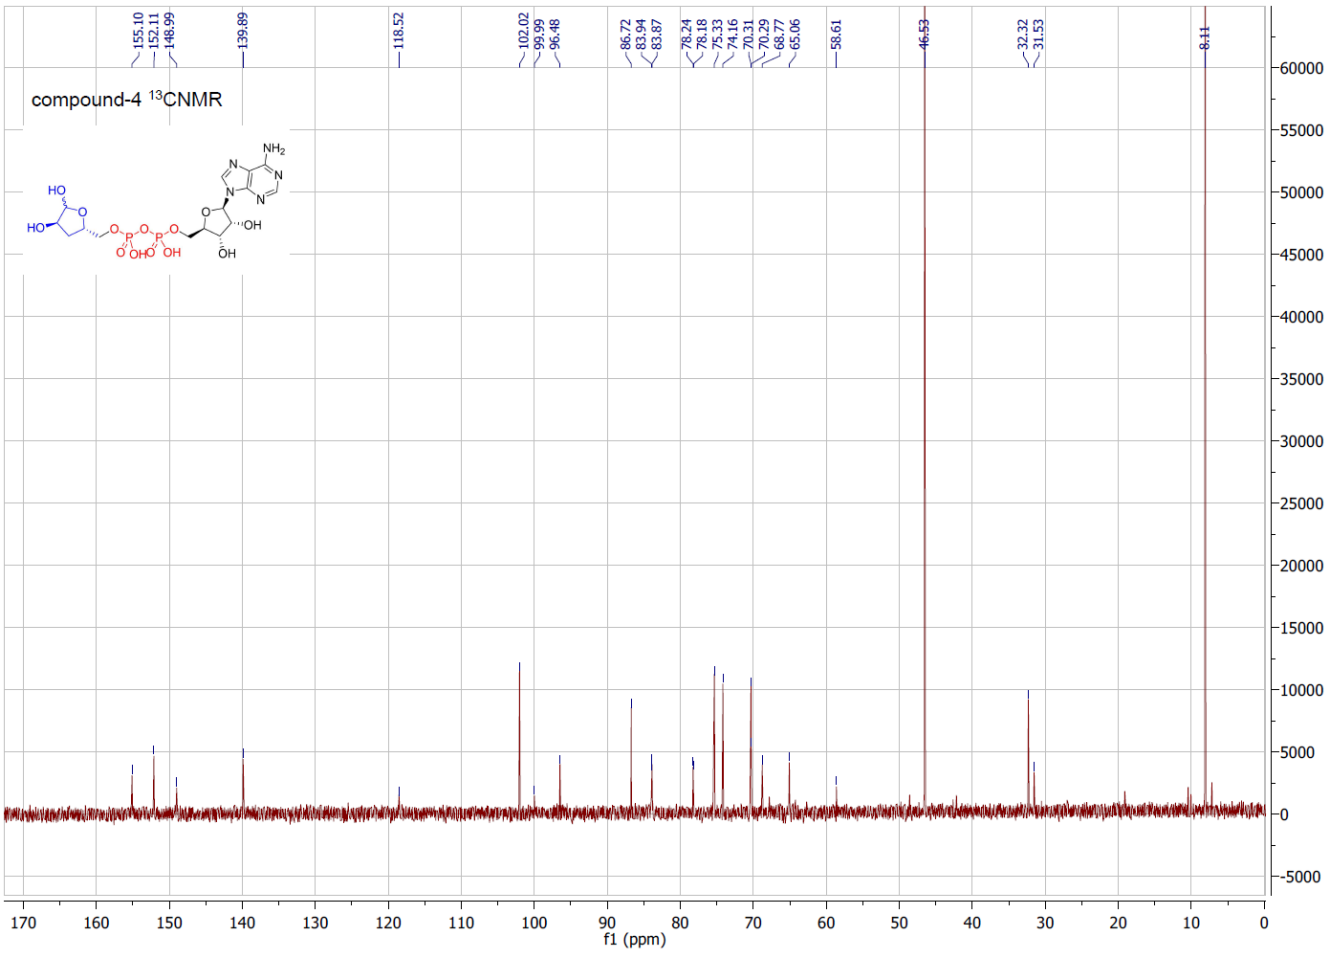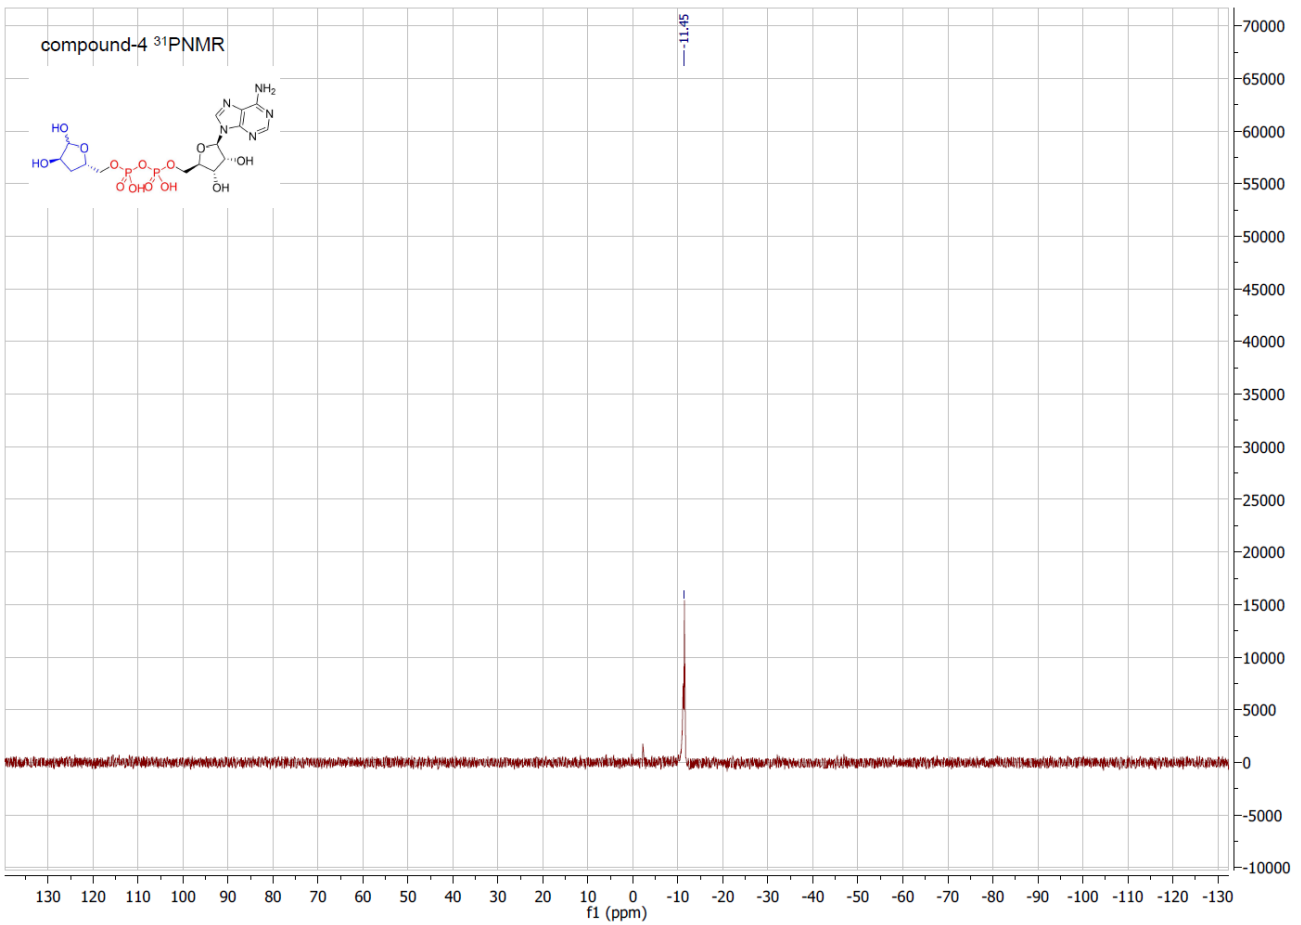

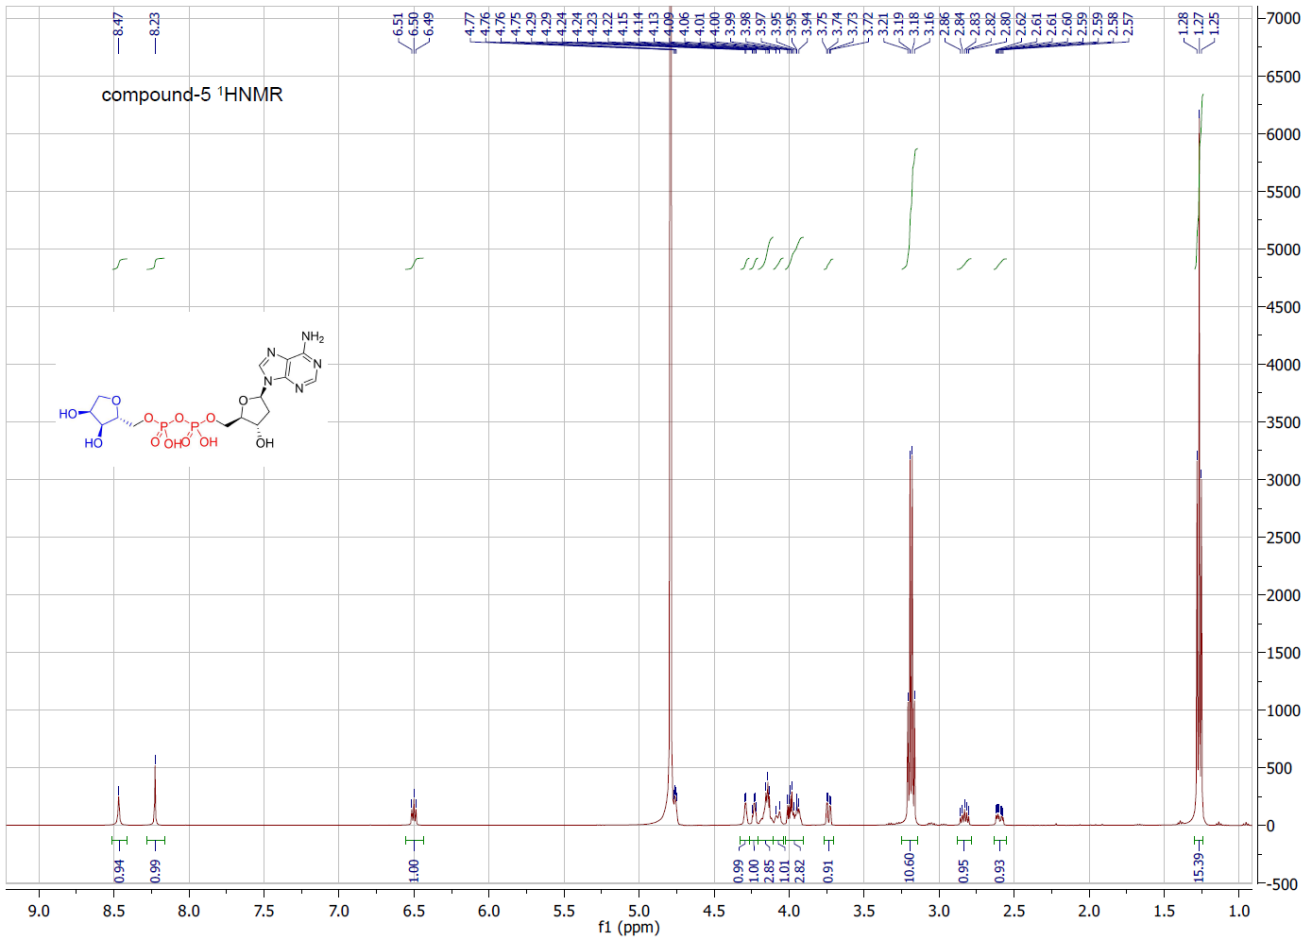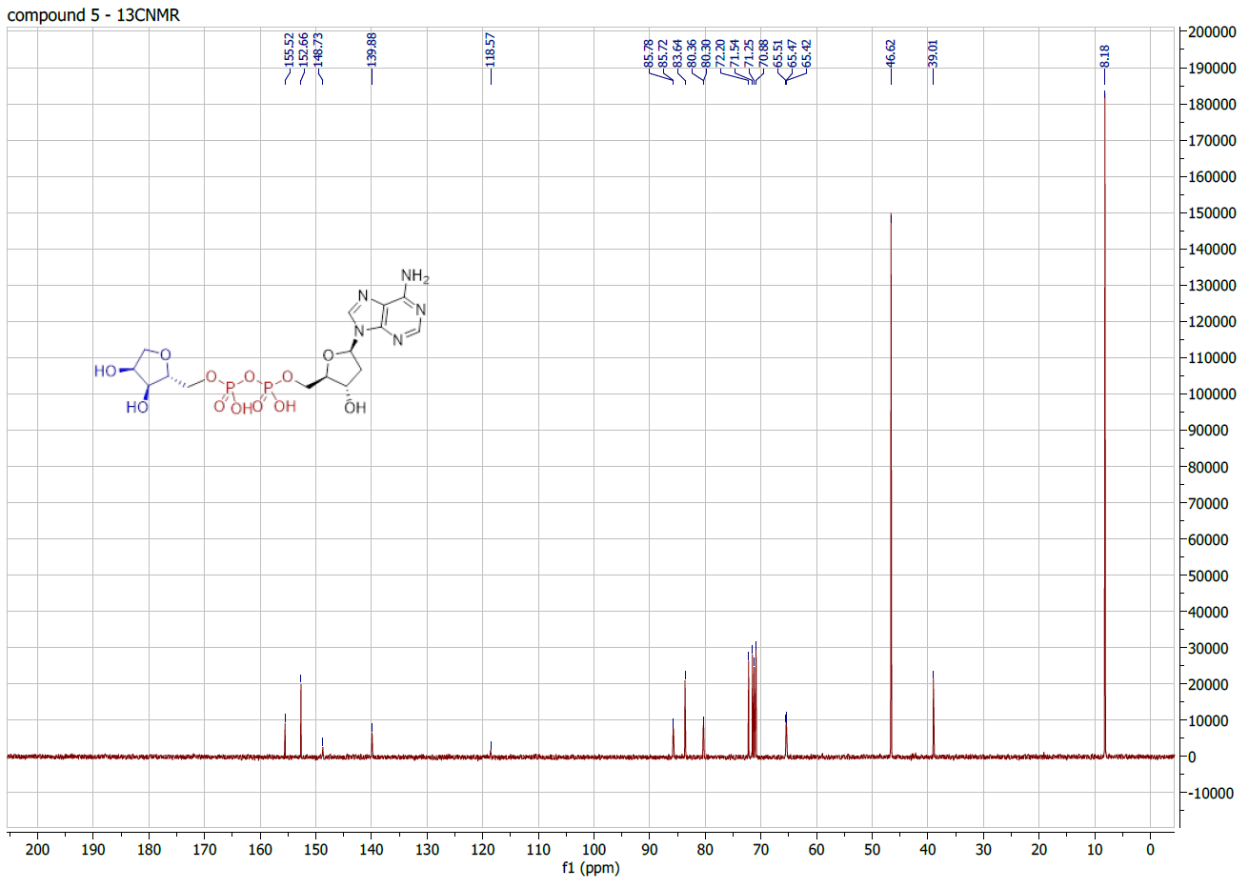

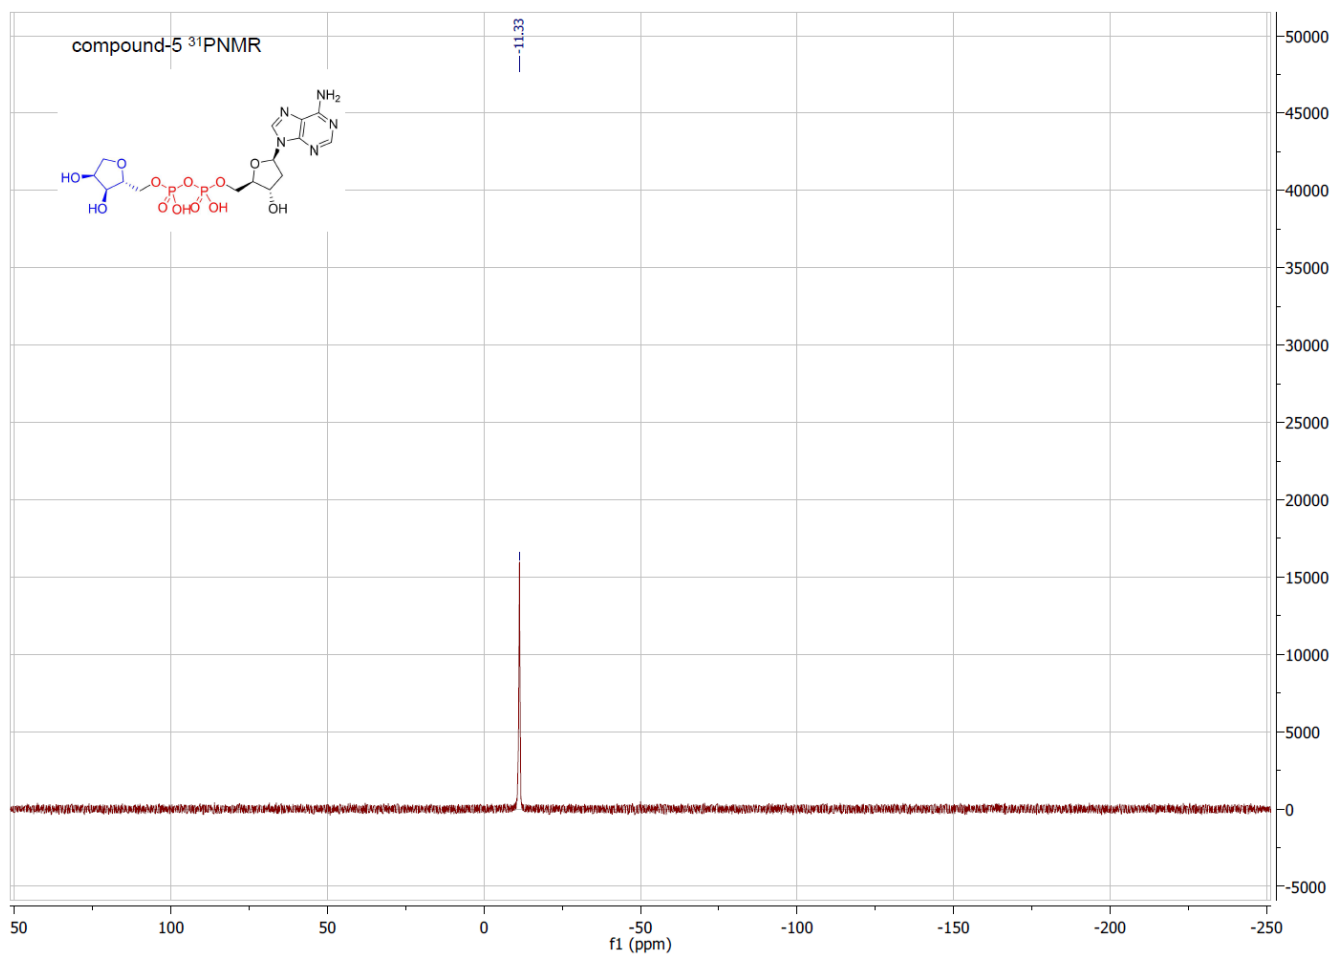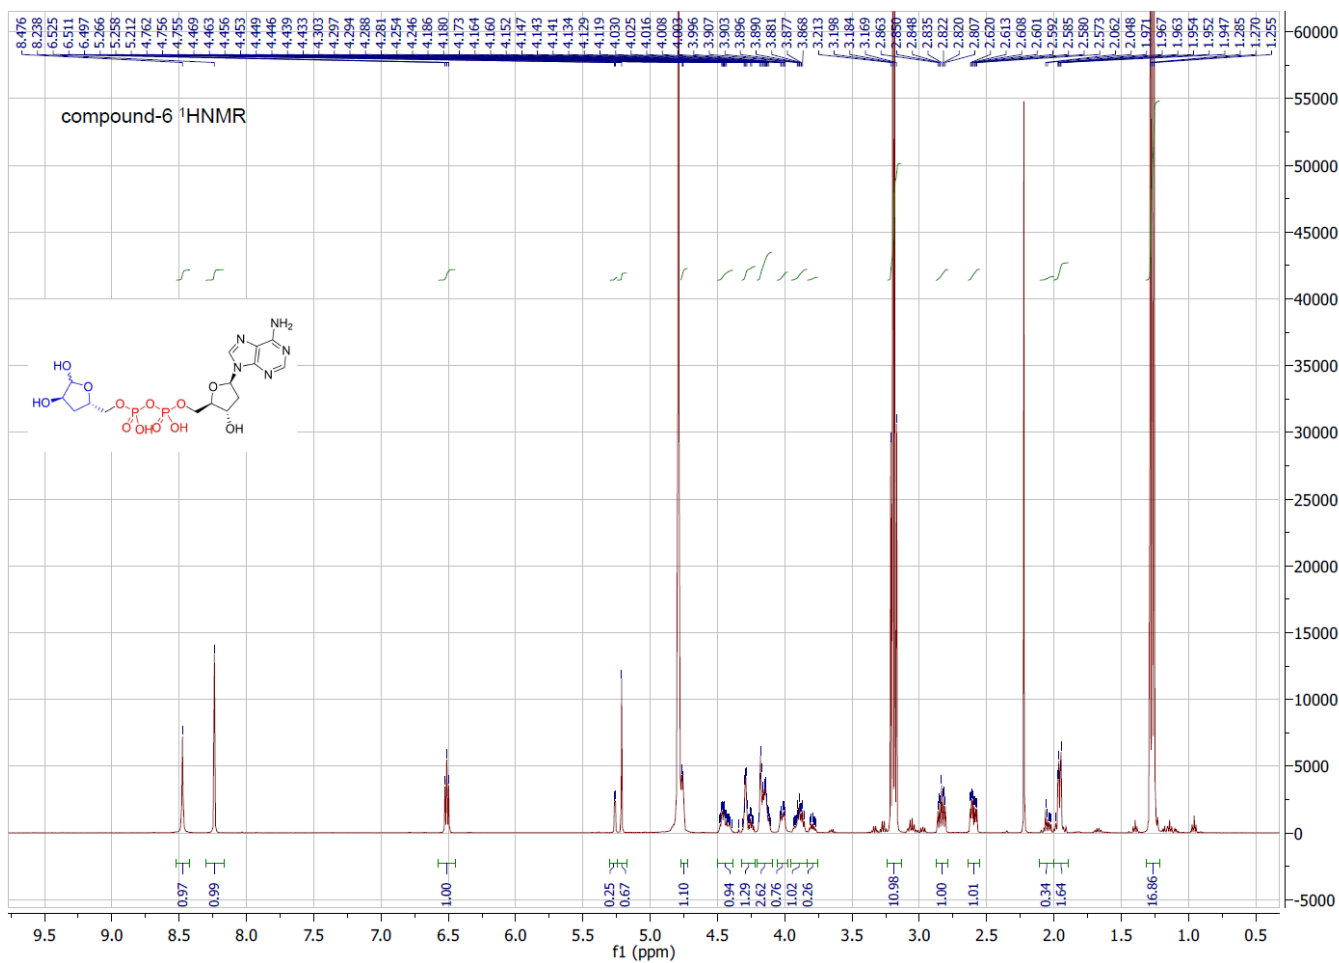

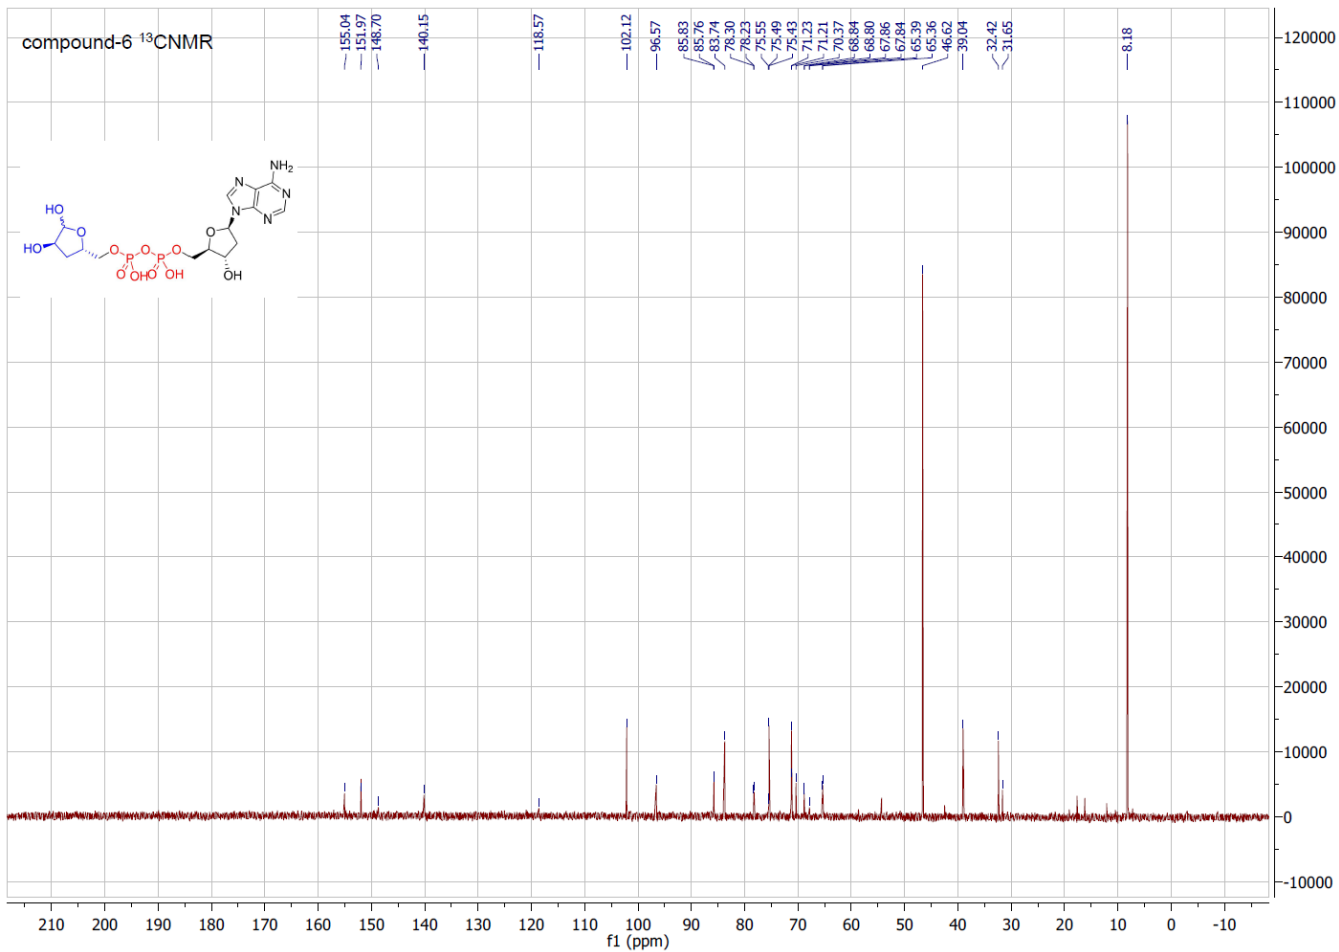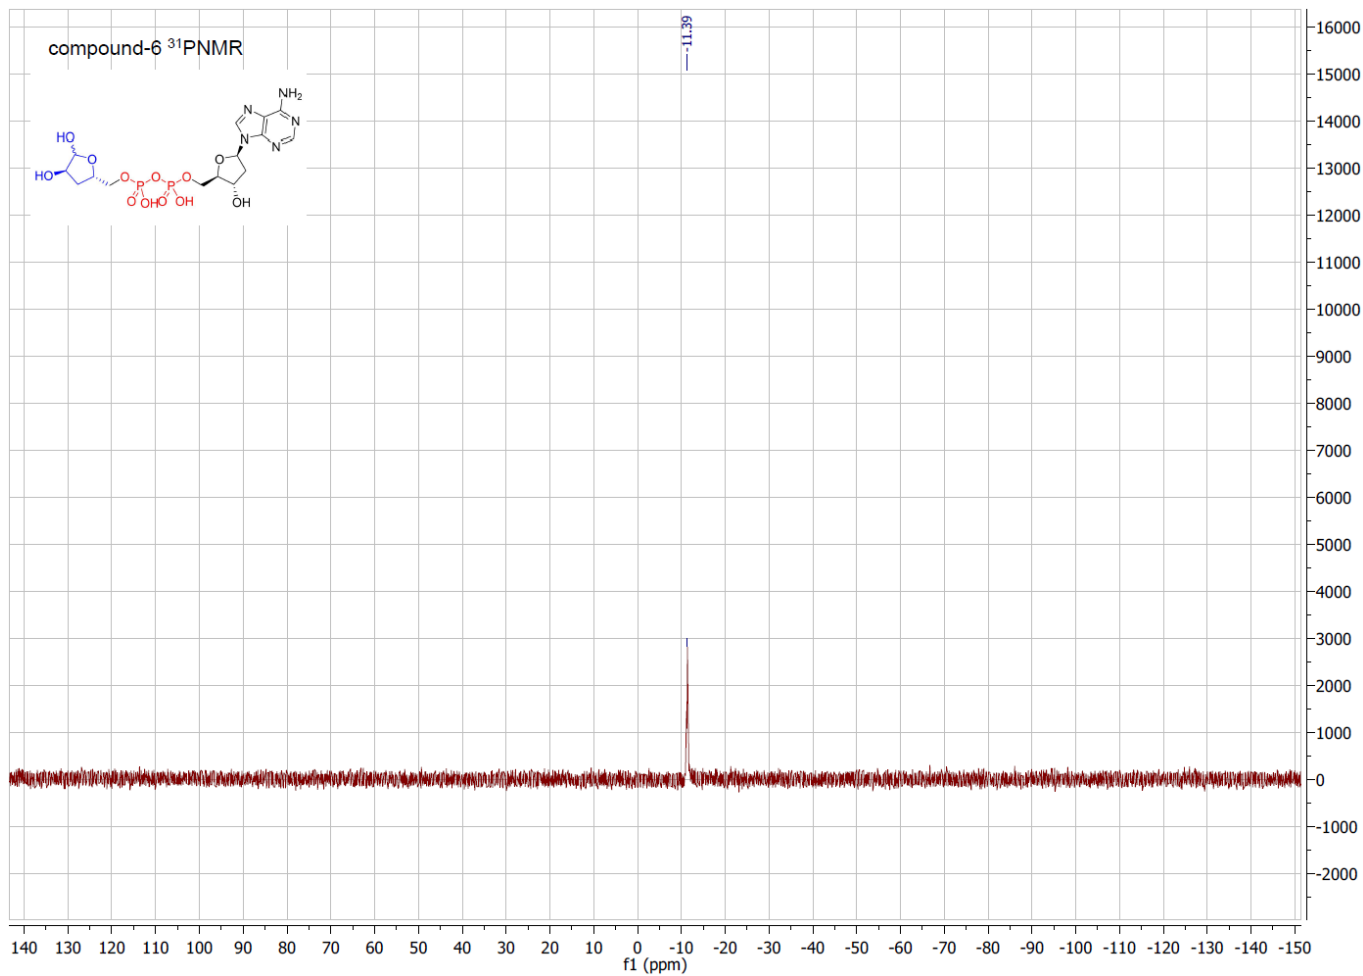

**compound-1 HPLC**

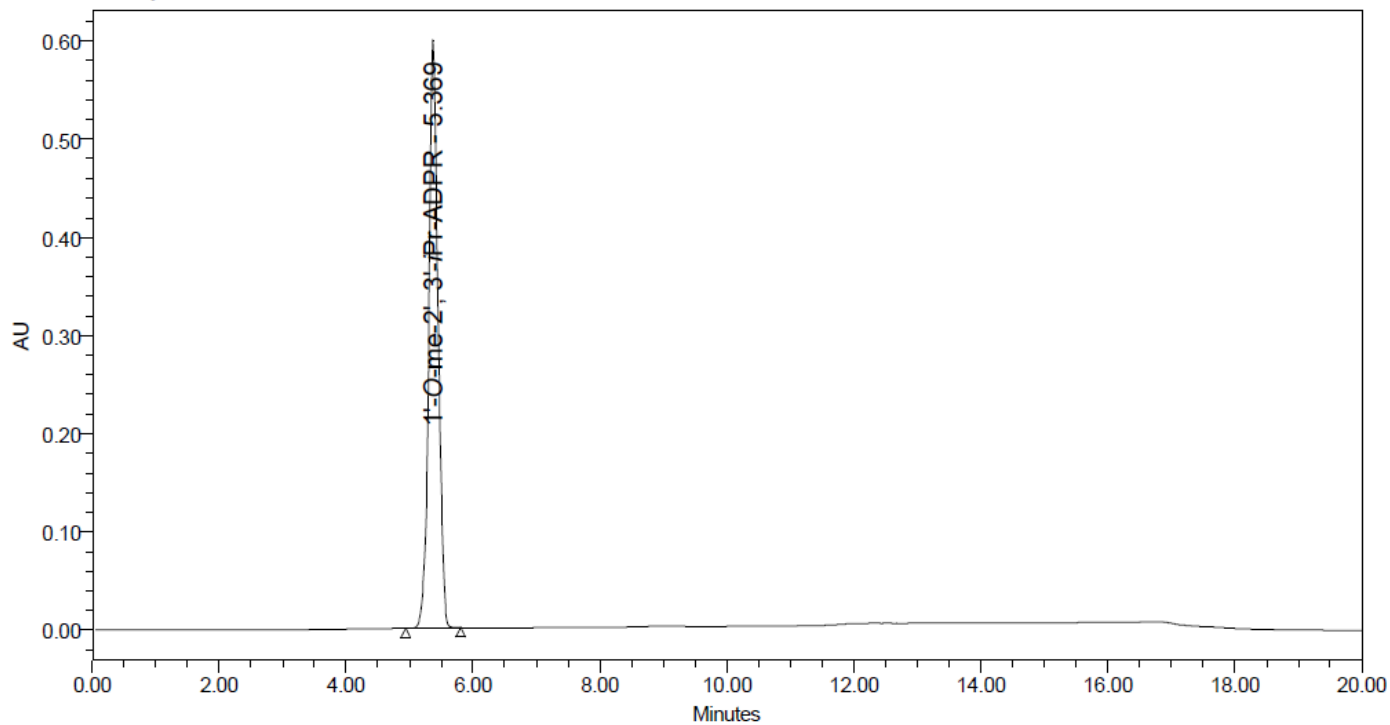

|   | Peak Name  | RT    | Area    | % Area | Height |
|---|------------|-------|---------|--------|--------|
| 1 | compound-1 | 5.369 | 6016865 | 100.00 | 599602 |

**compound-2 HPLC**

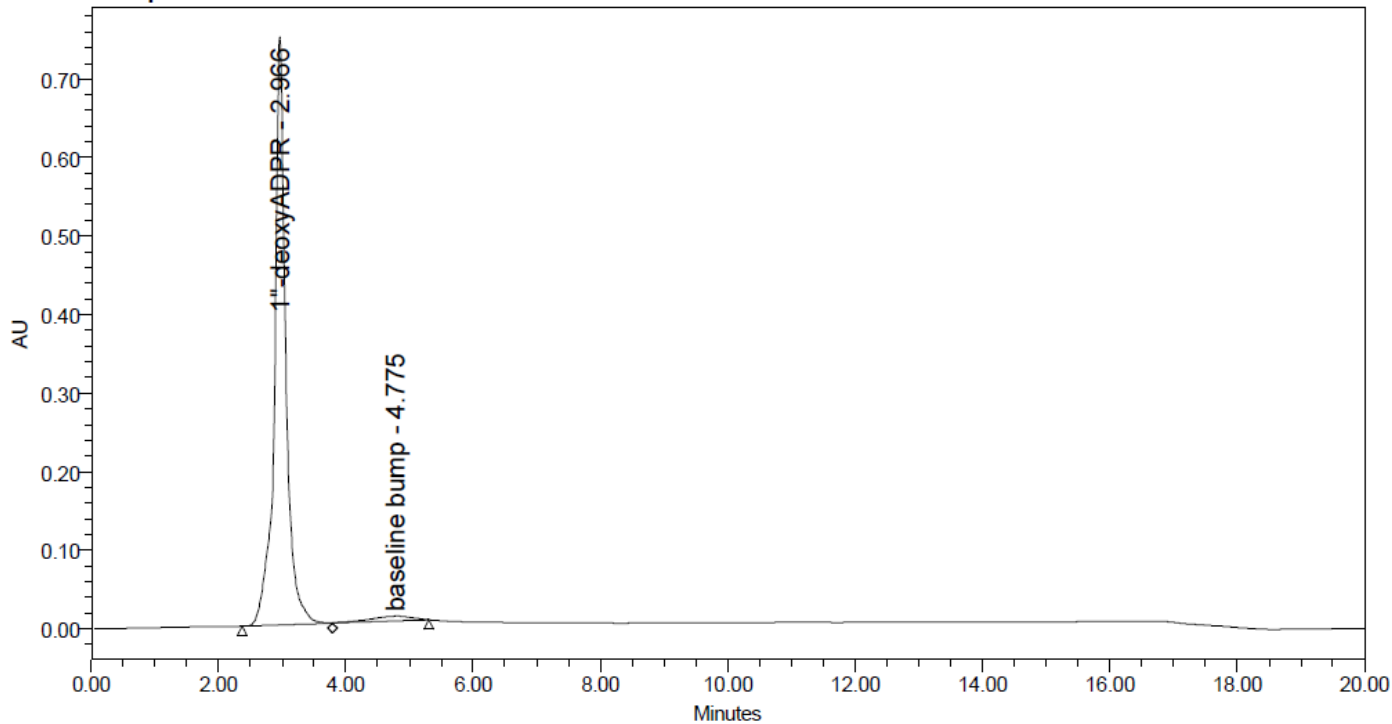

|   | Peak Name     | RT    | Area    | % Area | Height |
|---|---------------|-------|---------|--------|--------|
| 1 | compound-2    | 2.966 | 9281122 | 97.09  | 748450 |
| 2 | baseline bump | 4.775 | 278307  | 2.91   | 6239   |

compound-3 HPLC

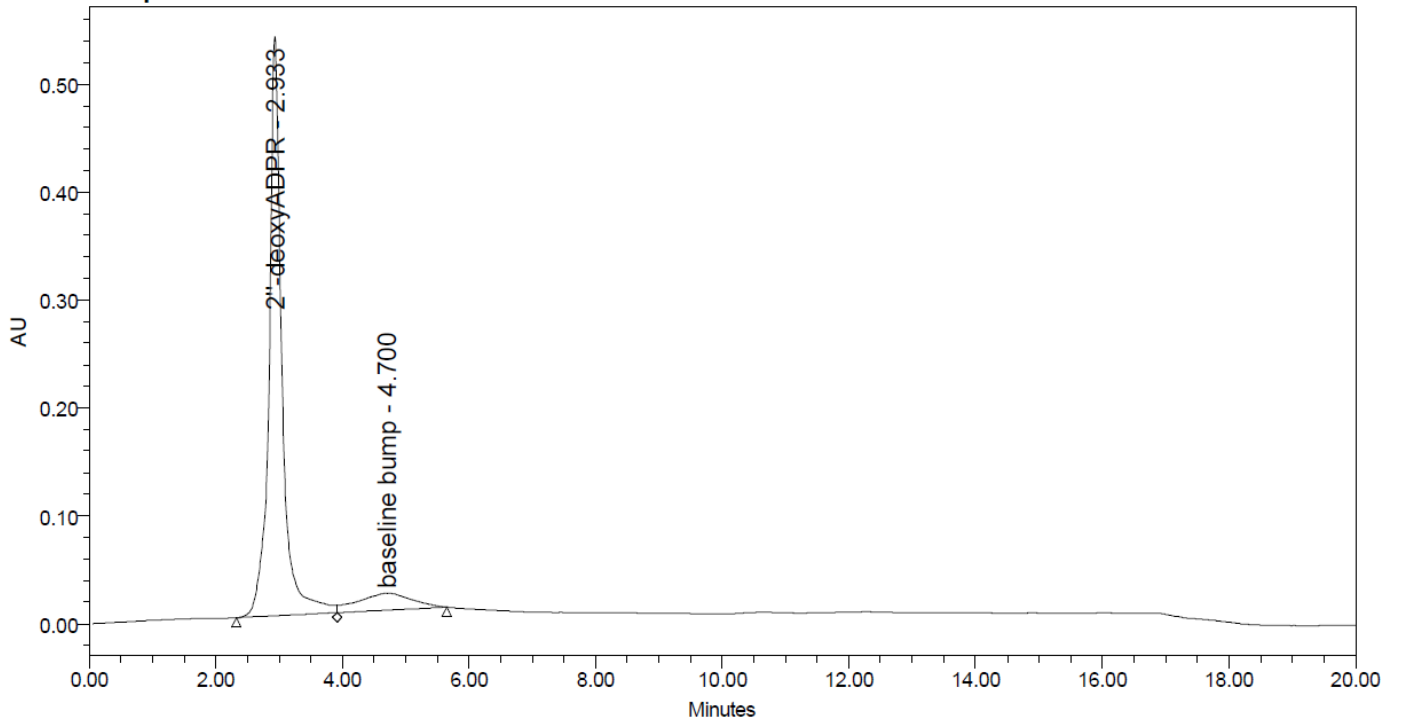

|   | Peak Name     | RT    | Area    | % Area | Height |
|---|---------------|-------|---------|--------|--------|
| 1 | 2''-deoxyADPR | 2.933 | 7595191 | 88.97  | 536539 |
| 2 | baseline bump | 4.700 | 941594  | 11.03  | 15903  |

compound-4 HPLC

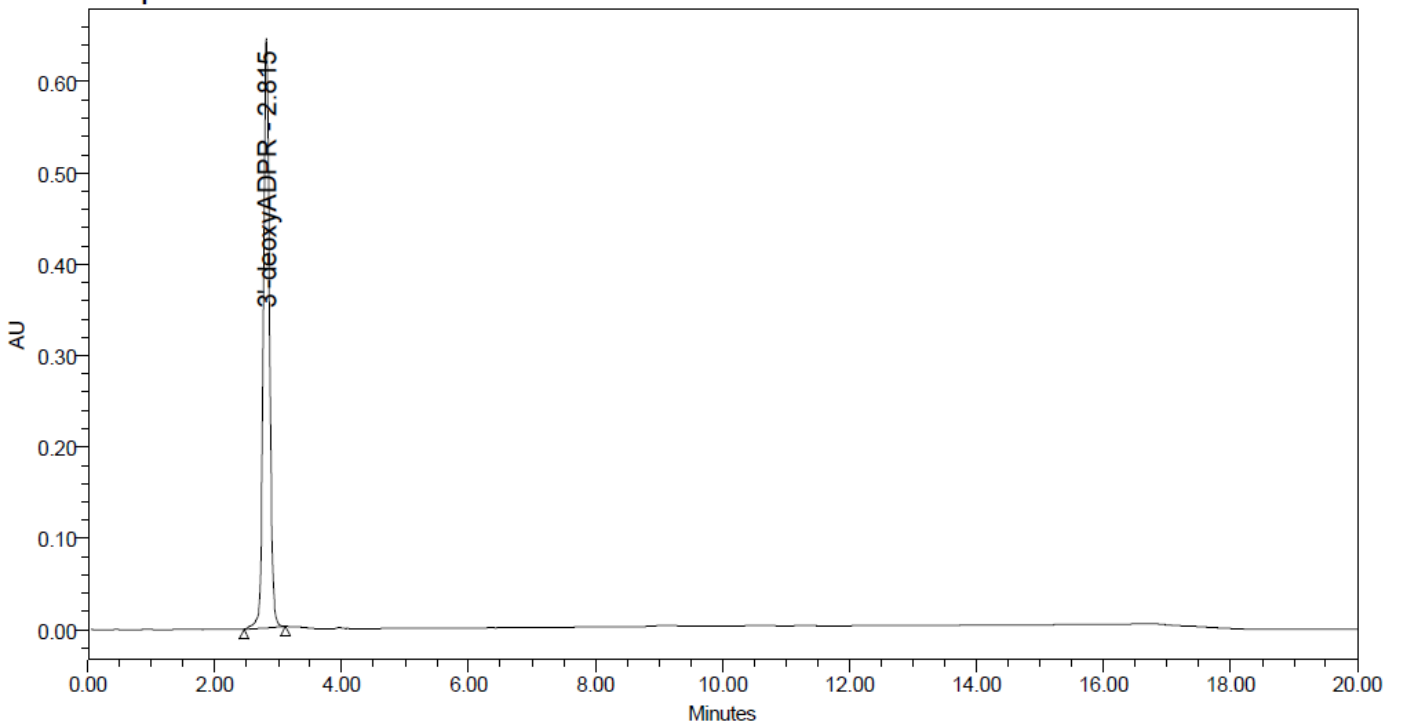

|   | Peak Name  | RT    | Area    | % Area | Height |
|---|------------|-------|---------|--------|--------|
| 1 | compound-4 | 2.815 | 4332210 | 100.00 | 645567 |



compound-5 HPLC

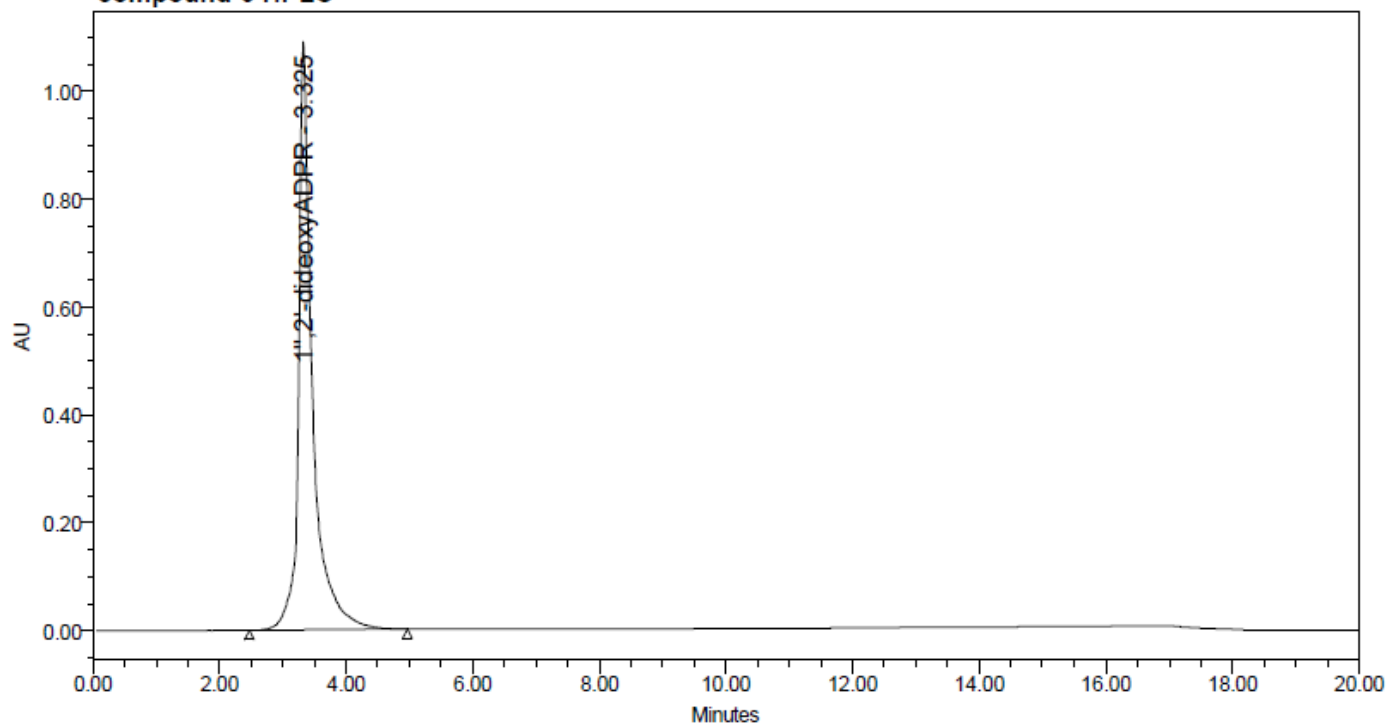

|   | Peak Name  | RT    | Area     | % Area | Height  |
|---|------------|-------|----------|--------|---------|
| 1 | compound-5 | 3.325 | 16556203 | 100.00 | 1090063 |

compound-6 HPLC

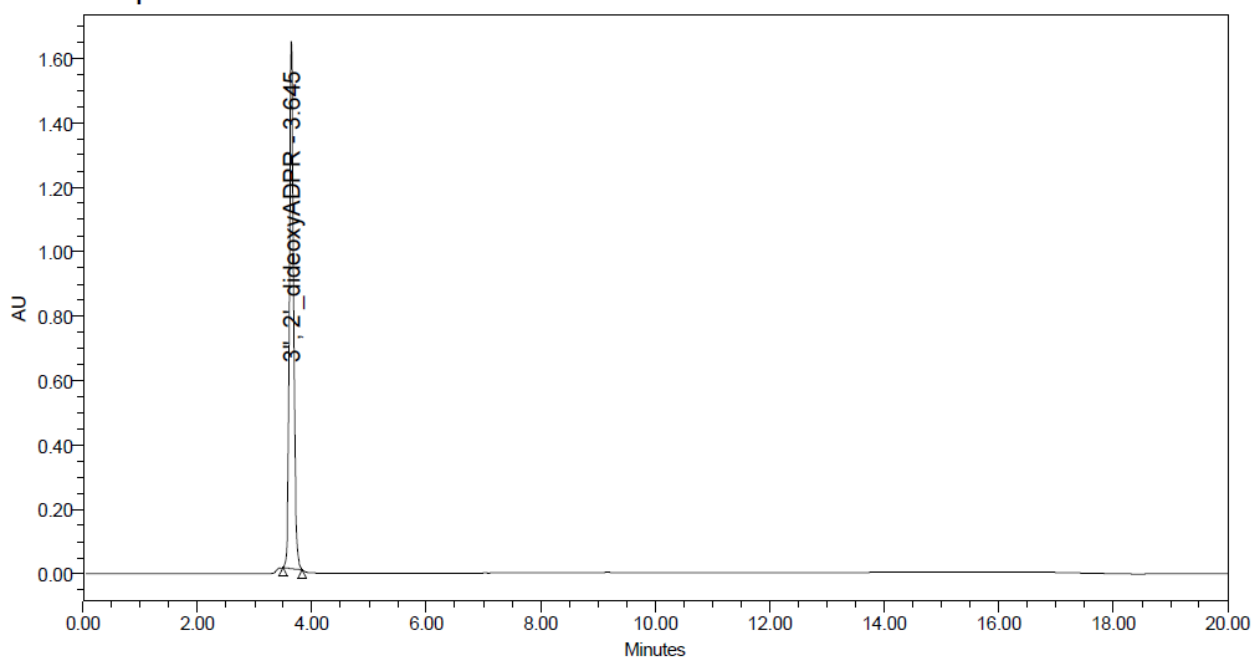

|   | Peak Name         | RT    | Area    | % Area | Height  |
|---|-------------------|-------|---------|--------|---------|
| 1 | Imp_1             | 2.996 |         |        |         |
| 2 | 2d_AMP            | 3.282 |         |        |         |
| 3 | compound-6        | 3.645 | 8580452 | 100.00 | 1642392 |
| 4 | Bis_2d_AMP        | 4.044 |         |        |         |
| 5 | 2d_AMP_imidazolid | 4.346 |         |        |         |

compound-1 MS

-MS, 1.0-1.3min #(21-26), -Spectral Bkgrnd

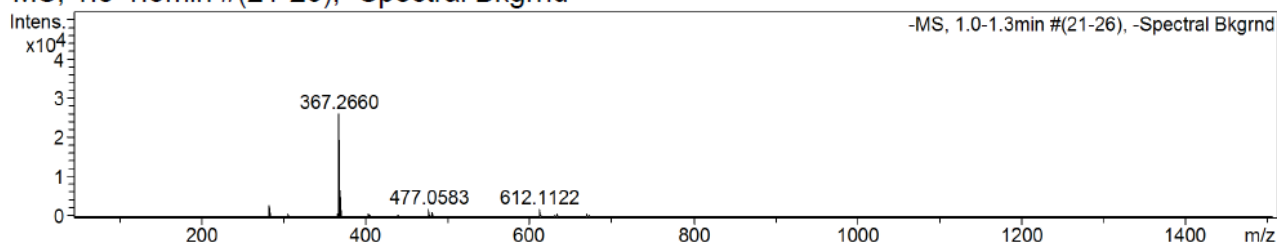

| #  | m/z      | I     | I %   | Area | S/N     |
|----|----------|-------|-------|------|---------|
| 1  | 283.0606 | 2716  | 10.5  | 96   | 4956.2  |
| 2  | 305.5533 | 663   | 2.6   | 26   | 869.3   |
| 3  | 367.2660 | 25957 | 100.0 | 1585 | 18013.9 |
| 4  | 368.2699 | 6576  | 25.3  | 414  | 4528.8  |
| 5  | 369.2739 | 844   | 3.3   | 48   | 577.2   |
| 6  | 403.2415 | 745   | 2.9   | 46   | 524.5   |
| 7  | 477.0583 | 1972  | 7.6   | 128  | 3833.1  |
| 8  | 481.2580 | 1042  | 4.0   | 61   | 2251.9  |
| 9  | 612.1122 | 2025  | 7.8   | 156  | 5845.0  |
| 10 | 670.0612 | 604   | 2.3   | 53   | 1118.4  |

Generate Molecular Formula Parameters

| Charge   | Tolerance | SearchRadius | H/C Ratio min. | H/C Ratio max. | Electron Conf. | Nitrogen Rule | sigma limit |
|----------|-----------|--------------|----------------|----------------|----------------|---------------|-------------|
| negative | 10 ppm    | 0.05 m/z     | 0              | 3              | both           | true          | 0.05        |

Expected Formula C19 H29 N5 O14 P2 Adduct(s): H, Na

| # | meas. m/z | theo. m/z  | Err[ppm] | Sigma  | Formula                |
|---|-----------|------------|----------|--------|------------------------|
| 1 | 612.1122  | 612.110799 | -1.40    | 0.0278 | C 19 H 28 N 5 O 14 P 2 |

Note: Sigma fits < 0.05 indicates high probability of correct MF, and mass accuracy of 5ppm or better is generally acceptable for publication

compound-2 MS

-MS, 1.0-1.3min #(24-30), -Spectral Bkgrnd

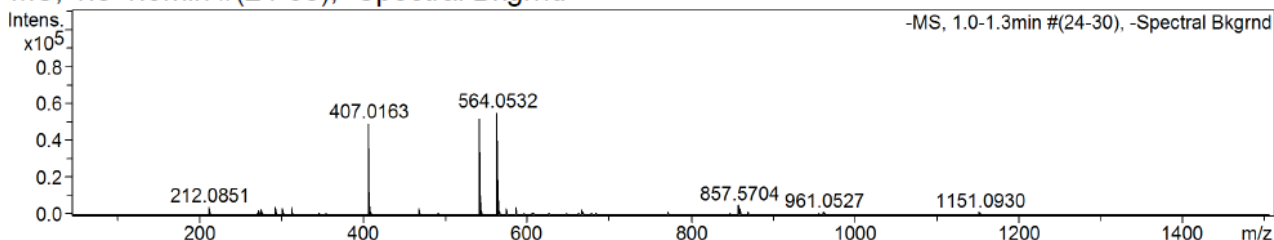

| #  | m/z      | I     | I %   | Area | S/N    |
|----|----------|-------|-------|------|--------|
| 1  | 212.0851 | 4199  | 7.6   | 42   | 1273.9 |
| 2  | 292.9828 | 4115  | 7.5   | 172  | 504.8  |
| 3  | 407.0163 | 49405 | 89.6  | 2851 | 7410.6 |
| 4  | 408.0200 | 6499  | 11.8  | 368  | 982.6  |
| 5  | 542.0716 | 51608 | 93.6  | 3540 | 3320.9 |
| 6  | 543.0747 | 10245 | 18.6  | 777  | 650.1  |
| 7  | 564.0532 | 55139 | 100.0 | 3871 | 2714.5 |
| 8  | 564.5546 | 5698  | 10.3  | 467  | 279.0  |
| 9  | 565.0575 | 10283 | 18.6  | 760  | 500.9  |
| 10 | 857.5704 | 5209  | 9.4   | 559  | 654.1  |

Generate Molecular Formula Parameters

| Charge   | Tolerance | SearchRadius | H/C Ratio min. | H/C Ratio max. | Electron Conf. | Nitrogen Rule | sigma limit |
|----------|-----------|--------------|----------------|----------------|----------------|---------------|-------------|
| negative | 10 ppm    | 0.05 m/z     | 0              | 3              | both           | true          | 0.05        |

Expected Formula C15 H23 N5 O13 P2 Adduct(s): H, Na

| # | meas. m/z | theo. m/z  | Err[ppm] | Sigma  | Formula                |
|---|-----------|------------|----------|--------|------------------------|
| 1 | 542.0716  | 542.068934 | -4.00    | 0.0066 | C 15 H 22 N 5 O 13 P 2 |

Note: Sigma fits < 0.05 indicates high probability of correct MF, and mass accuracy of 5ppm or better is generally acceptable for publication

compound-3 MS

-MS, 1.0-1.3min #(24-30), -Spectral Bkgrnd

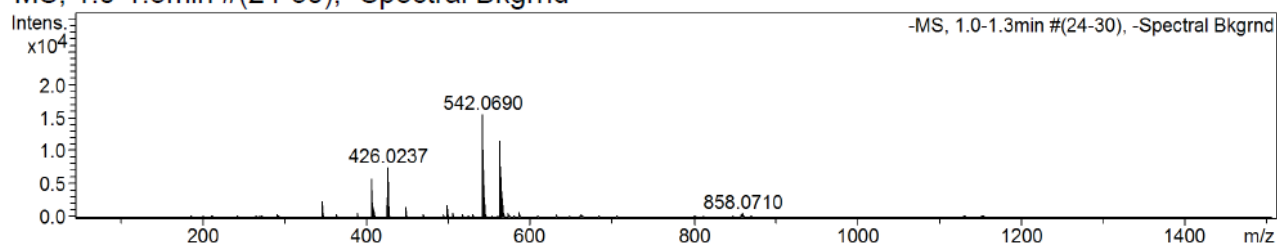

| #  | m/z      | I     | I %   | Area | S/N    |
|----|----------|-------|-------|------|--------|
| 1  | 346.0562 | 2290  | 14.9  | 110  | 999.9  |
| 2  | 407.0157 | 5676  | 36.8  | 299  | 1993.8 |
| 3  | 408.0199 | 2235  | 14.5  | 117  | 787.7  |
| 4  | 426.0237 | 7460  | 48.4  | 364  | 2800.8 |
| 5  | 542.0690 | 15407 | 100.0 | 1087 | 1707.3 |
| 6  | 543.0753 | 7202  | 46.7  | 519  | 787.8  |
| 7  | 544.0799 | 3131  | 20.3  | 249  | 338.1  |
| 8  | 564.0527 | 11620 | 75.4  | 912  | 1001.8 |
| 9  | 565.0579 | 6015  | 39.0  | 451  | 513.4  |
| 10 | 566.0639 | 2940  | 19.1  | 198  | 248.4  |

Generate Molecular Formula Parameters

| Charge   | Tolerance | SearchRadius | H/C Ratio min. | H/C Ratio max. | Electron Conf. | Nitrogen Rule | sigma limit |
|----------|-----------|--------------|----------------|----------------|----------------|---------------|-------------|
| negative | 10 ppm    | 0.05 m/z     | 0              | 3              | both           | true          | 0.05        |

Expected Formula C15 H23 N5 O13 P2 Adduct(s): H, Na

| # | meas. m/z | theo. m/z  | Err[ppm] | Sigma  | Formula                     |
|---|-----------|------------|----------|--------|-----------------------------|
| 1 | 566.0639  | 566.066529 | 5.60     | 0.0058 | C 15 H 23 N 5 Na 1 O 13 P 2 |

Note: Sigma fits < 0.05 indicates high probability of correct MF, and mass accuracy of 5ppm or better is generally acceptable for publication

compound-4 MS

-MS, 1.0-1.3min #(24-30), -Spectral Bkgrnd

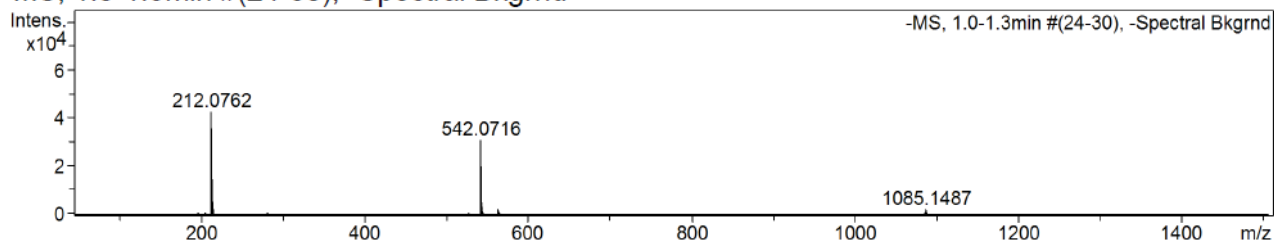

| #  | m/z       | I     | I %   | Area | S/N     |
|----|-----------|-------|-------|------|---------|
| 1  | 211.9125  | 488   | 1.2   | 25   | 420.9   |
| 2  | 212.0762  | 42326 | 100.0 | 1126 | 36566.6 |
| 3  | 213.0775  | 6505  | 15.4  | 128  | 5691.5  |
| 4  | 214.0706  | 2317  | 5.5   | 38   | 2053.8  |
| 5  | 542.0716  | 30786 | 72.7  | 2127 | 17385.3 |
| 6  | 543.0728  | 5061  | 12.0  | 379  | 2813.5  |
| 7  | 544.0775  | 1224  | 2.9   | 72   | 669.9   |
| 8  | 564.0562  | 2302  | 5.4   | 149  | 964.1   |
| 9  | 1085.1487 | 2005  | 4.7   | 270  | 742.2   |
| 10 | 1086.1562 | 706   | 1.7   | 82   | 261.9   |

Generate Molecular Formula Parameters

| Charge   | Tolerance | SearchRadius | H/C Ratio min. | H/C Ratio max. | Electron Conf. | Nitrogen Rule | sigma limit |
|----------|-----------|--------------|----------------|----------------|----------------|---------------|-------------|
| negative | 10 ppm    | 0.05 m/z     | 0              | 3              | both           | true          | 0.05        |

Expected Formula C15 H23 N5 O13 P2 Adduct(s): H, Na

| # | meas. m/z | theo. m/z  | Err[ppm] | Sigma  | Formula                |
|---|-----------|------------|----------|--------|------------------------|
| 1 | 542.0716  | 542.068934 | -3.90    | 0.0108 | C 15 H 22 N 5 O 13 P 2 |

Note: Sigma fits < 0.05 indicates high probability of correct MF, and mass accuracy of 5ppm or better is generally acceptable for publication

**compound-5 MS**

-MS, 1.0-1.3min #(24-30), -Spectral Bkgrnd

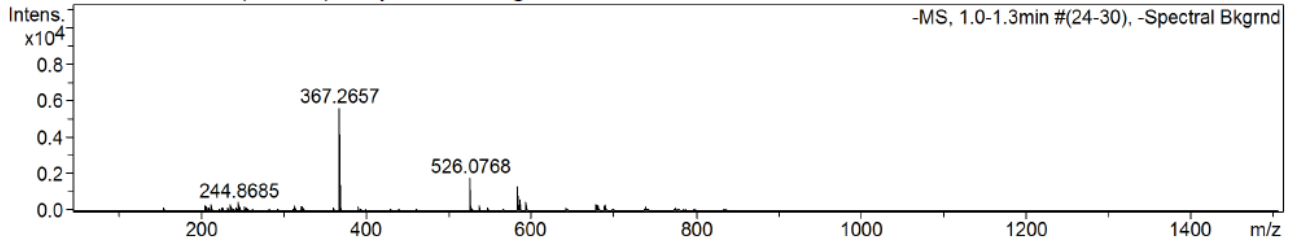

| #  | m/z      | I    | I %   | Area | S/N    |
|----|----------|------|-------|------|--------|
| 1  | 212.0740 | 369  | 6.6   | 5    | 1406.7 |
| 2  | 244.8685 | 471  | 8.4   | 16   | 1214.9 |
| 3  | 367.2657 | 5596 | 100.0 | 305  | 6685.7 |
| 4  | 368.2686 | 1470 | 26.3  | 78   | 1749.1 |
| 5  | 526.0768 | 1777 | 31.8  | 107  | 2795.6 |
| 6  | 584.0244 | 1324 | 23.7  | 84   | 1305.0 |
| 7  | 585.0318 | 379  | 6.8   | 26   | 372.3  |
| 8  | 586.0266 | 592  | 10.6  | 38   | 579.8  |
| 9  | 594.0596 | 495  | 8.8   | 25   | 471.3  |
| 10 | 679.9457 | 374  | 6.7   | 32   | 279.6  |

**Generate Molecular Formula Parameters**

| Charge   | Tolerance | SearchRadius | H/C Ratio min. | H/C Ratio max. | Electron Conf. | Nitrogen Rule | sigma limit |
|----------|-----------|--------------|----------------|----------------|----------------|---------------|-------------|
| negative | 10 ppm    | 0.05 m/z     | 0              | 3              | both           | true          | 0.05        |

**Expected Formula** C15 H23 N5 O12 P2 **Adduct(s):** H, Na

| # | meas. m/z | theo. m/z  | Err[ppm] | Sigma  | Formula                |
|---|-----------|------------|----------|--------|------------------------|
| 1 | 526.0768  | 526.074019 | -4.20    | 0.0397 | C 15 H 22 N 5 O 12 P 2 |

Note: Sigma fits < 0.05 indicates high probability of correct MF, and mass accuracy of 5ppm or better is generally acceptable for publication

**compound-6 MS**

-MS, 1.0-1.3min #(24-30), -Spectral Bkgrnd

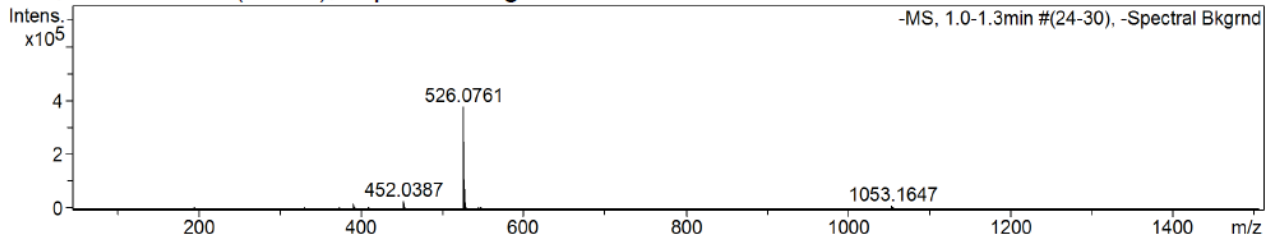

| #  | m/z       | I      | I %   | Area  | S/N     |
|----|-----------|--------|-------|-------|---------|
| 1  | 373.0112  | 6549   | 1.7   | 364   | 113.9   |
| 2  | 391.0239  | 17827  | 4.7   | 1107  | 315.0   |
| 3  | 452.0387  | 28988  | 7.7   | 1779  | 498.8   |
| 4  | 453.0509  | 5804   | 1.5   | 296   | 99.5    |
| 5  | 525.9448  | 15147  | 4.0   | 1455  | 439.0   |
| 6  | 526.0761  | 375790 | 100.0 | 17196 | 10923.0 |
| 7  | 527.0795  | 109768 | 29.2  | 6220  | 3244.2  |
| 8  | 528.0839  | 19457  | 5.2   | 1450  | 584.7   |
| 9  | 548.0597  | 6850   | 1.8   | 317   | 312.3   |
| 10 | 1053.1647 | 10652  | 2.8   | 1505  | 1686.5  |

**Generate Molecular Formula Parameters**

| Charge   | Tolerance | SearchRadius | H/C Ratio min. | H/C Ratio max. | Electron Conf. | Nitrogen Rule | sigma limit |
|----------|-----------|--------------|----------------|----------------|----------------|---------------|-------------|
| negative | 10 ppm    | 0.05 m/z     | 0              | 3              | both           | true          | 0.05        |

**Expected Formula** C15 H23 N5 O12 P2 **Adduct(s):** H, Na

| # | meas. m/z | theo. m/z | Err[ppm] | Sigma | Formula |
|---|-----------|-----------|----------|-------|---------|
|---|-----------|-----------|----------|-------|---------|

Note: Sigma fits < 0.05 indicates high probability of correct MF, and mass accuracy of 5ppm or better is generally acceptable for publication

## References:

- (1) Ko, H.; Das, A.; Carter, R. L.; Fricks, I. P.; Zhou, Y.; Ivanov, A. A.; Melman, A.; Joshi, B. V.; Kováč, P.; Hajduch, J.; Kirk, K. L.; Harden, T. K.; Jacobson, K. A. Molecular Recognition in the P2Y<sub>14</sub>receptor: Probing the Structurally Permissive Terminal Sugar Moiety of Uridine-5'-Diphosphoglucose. *Bioorganic Med. Chem.* **2009**, *17* (14), 5298–5311.
- (2) Dabrowski-Tumanski, P.; Kowalska, J.; Jemielity, J. Efficient and Rapid Synthesis of Nucleoside Diphosphate Sugars from Nucleoside Phosphorimidazolides. *European J. Org. Chem.* **2013**, *2013* (11), 2147–2154.
